# Supplementary material for: Modelling the Mara River Basin with data uncertainty using water levels for calibration
Source: Copernicus journal article supplement (doi:10.5194/hess-2017-661), 2017-11-23
Supplement: Supplementary file 1 [file Supporting data.xlsx]

## Sheet: Station characteristics
Name	Number	Number	LAT	LON	Type	Source
Nyangores	1LA03		-0.789861	35.3465	Discharge, water level	WRMA
Kapkimolwa	1LB02		-0.898953	35.4374	Discharge, water level	WRMA
Kichwa Tembo	1LA04		-1.233	35.036	Discharge, water level	WRMA
Mines	5H2		-1.548	34.554	Discharge, water level	WRMA
MAGADI	637380		-1.883	36.283	Temperature	NOAA
MUSOMA	637330		-1.5	33.8	Temperature	NOAA
MARA SERENA	636735		-1.405	35.01	Temperature	NOAA
NAROK	637370		-1.133	35.833	Temperature	NOAA
KISII	637090		-0.667	34.783	Temperature	NOAA
KERICHO	637100		-0.367	35.267	Temperature	NOAA
NAKURU	637140		-0.267	36.1	Temperature	NOAA
DANSON K.NGUGI SAW MILL,ELBURG.	9035031		-0.38333	35.8	Precipitation	WRMA
MULOT POLICE POST	9035284	60682	-0.93333	35.4333	Precipitation	WRMA
NAIKARA AFRICA GOSPEL CHURCH	9135022	60754	-1.55	35.6333	Precipitation	WRMA
Baraget forest station	60652	9035241	-0.42	35.73	Precipitation	WRMA
SOTIK, TENWIK MISSION	9035079	60579	-0.75	35.3667	Precipitation	WRMA
SOTIK,KABOSON GOSPEL MISSION	9135008	60745	-1	35.2333	Precipitation	WRMA
SOTIK, AITONG VET. HOUSE	9135010	60747	-1.18333	35.25	Precipitation	WRMA
NAROK,KEEKOROK GAME LODGE	9135013	60750	-1.58333	35.2333	Precipitation	WRMA
KICHWA TEMBO CAMP	9135035	60761	-1.23333	35.0167	Precipitation	WRMA
NAROTIA FOREST STATION	9035303	60699	-0.76666	35.5333	Precipitation	WRMA
NYANGORES FOREST STATION	9035302	60698	-0.7	35.4333	Precipitation	WRMA
SOTIK WATER SUPPLY	9035264	60670	-0.683333	35.1167	Precipitation	WRMA
BOMET WATER SUPPLY	9035265	60671	-0.783333	35.35	Precipitation	WRMA
OLEGURUOE D.O'S OFFICE	9035085		-0.583333	35.6833	Precipitation	WRMA
TALEK CAMP NAROK	9135012	60749	-1.45	35.25	Precipitation	WRMA
MARA SERENA LODGE	9135030	60758	-1.25	35.1167	Precipitation	WRMA
GOVERNOR'S CAMP	9135026	60756	-1.28333	35.0833	Precipitation	WRMA
SOTIK DIV AGRI OFFICE	9134011	60727	-1	34.8833	Precipitation	WRMA
TARANGANYA SEC. SCHOOL	9134012	60728	-1.23333	34.6	Precipitation	WRMA
LOLGORIEN POLICE POST	9134027	60734	-1.23333	34.8167	Precipitation	WRMA
ENTASEKERA CHIEF'S CAMP	9135020	60753	-1.83333	35.8333	Precipitation	WRMA
NTIMARU CHIEF'S OFFICE	9134019	60731	-1.33333	34.6833	Precipitation	WRMA
BUHEMBA TR.CENTRE	9134029	90172	-1.76667	34.0833	Precipitation	WRMA
KISAKA NGURUIME	9134016	90173	-1.56667	34.4667	Precipitation	WRMA
MUSOMA MET.	9133000	90045	-1.5	33.8	Precipitation	WRMA
NYABANGI MISSION	9133004	90049	-1.55	33.8667	Precipitation	WRMA
TARIME HYDROMET	9134026	90062	-1.33333	34.3333	Precipitation	WRMA
MUGUMU PRIMARY SCHOOL	9134033	90063	-1.86667	34.7167	Precipitation	WRMA

## Sheet: Time series
	637330			637140			637100			637090			637370
	TEMP	MAX	MIN	TEMP	MAX	MIN	TEMP	MAX	MIN	TEMP	MAX	MIN	TEMP	MAX	MIN
1957-01-01	NaN	NaN	NaN	21.3889	23.8889	18.2778	NaN	NaN	NaN	NaN	NaN	NaN	NaN	NaN	NaN
1957-01-02	NaN	NaN	NaN	NaN	NaN	NaN	NaN	NaN	NaN	NaN	NaN	NaN	NaN	NaN	NaN
1957-01-03	NaN	NaN	NaN	NaN	NaN	NaN	NaN	NaN	NaN	NaN	NaN	NaN	NaN	NaN	NaN
1957-01-04	NaN	NaN	NaN	19.3333	24.3889	13.2778	NaN	NaN	NaN	NaN	NaN	NaN	NaN	NaN	NaN
1957-01-05	NaN	NaN	NaN	17.1111	23.8889	12.7778	NaN	NaN	NaN	NaN	NaN	NaN	NaN	NaN	NaN
1957-01-06	NaN	NaN	NaN	19.6667	24.3889	14.3889	NaN	NaN	NaN	NaN	NaN	NaN	NaN	NaN	NaN
1957-01-07	NaN	NaN	NaN	19.5556	23.8889	12.7778	NaN	NaN	NaN	NaN	NaN	NaN	NaN	NaN	NaN
1957-01-08	NaN	NaN	NaN	19.2222	26.7222	6.11111	NaN	NaN	NaN	NaN	NaN	NaN	NaN	NaN	NaN
1957-01-09	NaN	NaN	NaN	18.8889	25.6111	4.38889	NaN	NaN	NaN	NaN	NaN	NaN	NaN	NaN	NaN
1957-01-10	NaN	NaN	NaN	19.7778	25.6111	7.22222	NaN	NaN	NaN	NaN	NaN	NaN	NaN	NaN	NaN
1957-01-11	NaN	NaN	NaN	19.3333	27.2222	4.38889	NaN	NaN	NaN	NaN	NaN	NaN	NaN	NaN	NaN
1957-01-12	NaN	NaN	NaN	18.2222	24.3889	3.88889	NaN	NaN	NaN	NaN	NaN	NaN	NaN	NaN	NaN
1957-01-13	NaN	NaN	NaN	20.3333	25.6111	12.7778	NaN	NaN	NaN	NaN	NaN	NaN	NaN	NaN	NaN
1957-01-14	NaN	NaN	NaN	20.2222	26.1111	10.6111	NaN	NaN	NaN	NaN	NaN	NaN	NaN	NaN	NaN
1957-01-15	NaN	NaN	NaN	19.1111	25	6.72222	NaN	NaN	NaN	NaN	NaN	NaN	NaN	NaN	NaN
1957-01-16	NaN	NaN	NaN	17.9444	25.6111	5.61111	NaN	NaN	NaN	NaN	NaN	NaN	NaN	NaN	NaN
1957-01-17	NaN	NaN	NaN	19.6667	27.7778	6.72222	NaN	NaN	NaN	NaN	NaN	NaN	NaN	NaN	NaN
1957-01-18	NaN	NaN	NaN	20.4444	29.3889	5	NaN	NaN	NaN	NaN	NaN	NaN	NaN	NaN	NaN
1957-01-19	NaN	NaN	NaN	18.8889	26.1111	6.72222	NaN	NaN	NaN	NaN	NaN	NaN	NaN	NaN	NaN
1957-01-20	NaN	NaN	NaN	20.3333	26.7222	7.77778	NaN	NaN	NaN	NaN	NaN	NaN	NaN	NaN	NaN
1957-01-21	NaN	NaN	NaN	20.2222	28.8889	5	NaN	NaN	NaN	NaN	NaN	NaN	NaN	NaN	NaN
1957-01-22	NaN	NaN	NaN	21.2222	26.7222	7.22222	NaN	NaN	NaN	NaN	NaN	NaN	NaN	NaN	NaN
1957-01-23	NaN	NaN	NaN	20.7778	27.2222	12.2222	NaN	NaN	NaN	NaN	NaN	NaN	NaN	NaN	NaN
1957-01-24	NaN	NaN	NaN	19.7778	27.2222	8.27778	NaN	NaN	NaN	NaN	NaN	NaN	NaN	NaN	NaN
1957-01-25	NaN	NaN	NaN	18	23.8889	9.38889	NaN	NaN	NaN	NaN	NaN	NaN	NaN	NaN	NaN
1957-01-26	NaN	NaN	NaN	19.8889	26.7222	9.38889	NaN	NaN	NaN	NaN	NaN	NaN	NaN	NaN	NaN
1957-01-27	NaN	NaN	NaN	19.6667	27.7778	10	NaN	NaN	NaN	NaN	NaN	NaN	NaN	NaN	NaN
1957-01-28	NaN	NaN	NaN	19.8889	26.1111	10	NaN	NaN	NaN	NaN	NaN	NaN	NaN	NaN	NaN
1957-01-29	NaN	NaN	NaN	19	24.3889	14.3889	NaN	NaN	NaN	NaN	NaN	NaN	NaN	NaN	NaN
1957-01-30	NaN	NaN	NaN	18.3333	23.8889	12.7778	NaN	NaN	NaN	NaN	NaN	NaN	NaN	NaN	NaN
1957-01-31	NaN	NaN	NaN	17.4444	21.1111	12.7778	NaN	NaN	NaN	NaN	NaN	NaN	NaN	NaN	NaN
1957-02-01	NaN	NaN	NaN	19.5556	25.6111	11.1111	NaN	NaN	NaN	NaN	NaN	NaN	NaN	NaN	NaN
1957-02-02	NaN	NaN	NaN	18	25.6111	8.27778	NaN	NaN	NaN	NaN	NaN	NaN	NaN	NaN	NaN
1957-02-03	NaN	NaN	NaN	19	26.1111	6.72222	NaN	NaN	NaN	NaN	NaN	NaN	NaN	NaN	NaN
1957-02-04	NaN	NaN	NaN	19.1111	24.3889	9.38889	NaN	NaN	NaN	NaN	NaN	NaN	NaN	NaN	NaN
1957-02-05	NaN	NaN	NaN	17.7778	23.2778	10	NaN	NaN	NaN	NaN	NaN	NaN	NaN	NaN	NaN
1957-02-06	NaN	NaN	NaN	18	23.2778	8.88889	NaN	NaN	NaN	NaN	NaN	NaN	NaN	NaN	NaN
1957-02-07	NaN	NaN	NaN	20.1111	26.1111	13.8889	NaN	NaN	NaN	NaN	NaN	NaN	NaN	NaN	NaN
1957-02-08	NaN	NaN	NaN	21	27.7778	10	NaN	NaN	NaN	NaN	NaN	NaN	NaN	NaN	NaN
1957-02-09	NaN	NaN	NaN	20.2222	23.8889	12.2222	NaN	NaN	NaN	NaN	NaN	NaN	NaN	NaN	NaN
1957-02-10	NaN	NaN	NaN	20.1111	26.7222	7.22222	NaN	NaN	NaN	NaN	NaN	NaN	NaN	NaN	NaN
1957-02-11	NaN	NaN	NaN	19.3333	25.6111	6.72222	NaN	NaN	NaN	NaN	NaN	NaN	NaN	NaN	NaN
1957-02-12	NaN	NaN	NaN	20.5556	27.2222	7.22222	NaN	NaN	NaN	NaN	NaN	NaN	NaN	NaN	NaN
1957-02-13	NaN	NaN	NaN	20.2222	27.2222	7.22222	NaN	NaN	NaN	NaN	NaN	NaN	NaN	NaN	NaN
1957-02-14	NaN	NaN	NaN	20	28.2778	5	NaN	NaN	NaN	NaN	NaN	NaN	NaN	NaN	NaN
1957-02-15	NaN	NaN	NaN	20	28.2778	4.38889	NaN	NaN	NaN	NaN	NaN	NaN	NaN	NaN	NaN
1957-02-16	NaN	NaN	NaN	20.4444	28.8889	4.38889	NaN	NaN	NaN	NaN	NaN	NaN	NaN	NaN	NaN
1957-02-17	NaN	NaN	NaN	20.3333	26.7222	6.11111	NaN	NaN	NaN	NaN	NaN	NaN	NaN	NaN	NaN
1957-02-18	NaN	NaN	NaN	20.5556	26.1111	11.7222	NaN	NaN	NaN	NaN	NaN	NaN	NaN	NaN	NaN
1957-02-19	NaN	NaN	NaN	20.8889	29.3889	6.11111	NaN	NaN	NaN	NaN	NaN	NaN	NaN	NaN	NaN
1957-02-20	NaN	NaN	NaN	20.1111	27.2222	8.27778	NaN	NaN	NaN	NaN	NaN	NaN	NaN	NaN	NaN
1957-02-21	NaN	NaN	NaN	20.6667	25.6111	11.1111	NaN	NaN	NaN	NaN	NaN	NaN	NaN	NaN	NaN
1957-02-22	NaN	NaN	NaN	20	25.6111	11.7222	NaN	NaN	NaN	NaN	NaN	NaN	NaN	NaN	NaN
1957-02-23	NaN	NaN	NaN	19.8889	25.6111	7.77778	NaN	NaN	NaN	NaN	NaN	NaN	NaN	NaN	NaN
1957-02-24	NaN	NaN	NaN	18.8889	25.6111	7.22222	NaN	NaN	NaN	NaN	NaN	NaN	NaN	NaN	NaN
1957-02-25	NaN	NaN	NaN	19.2222	26.1111	5.61111	NaN	NaN	NaN	NaN	NaN	NaN	NaN	NaN	NaN
1957-02-26	NaN	NaN	NaN	19.5556	27.2222	5.61111	NaN	NaN	NaN	NaN	NaN	NaN	NaN	NaN	NaN
1957-02-27	NaN	NaN	NaN	19.8889	26.7222	7.22222	NaN	NaN	NaN	NaN	NaN	NaN	NaN	NaN	NaN
1957-02-28	NaN	NaN	NaN	18.5556	26.7222	5.61111	NaN	NaN	NaN	NaN	NaN	NaN	NaN	NaN	NaN
1957-03-01	NaN	NaN	NaN	17.6667	23.2778	8.88889	NaN	NaN	NaN	NaN	NaN	NaN	NaN	NaN	NaN
1957-03-02	NaN	NaN	NaN	17.3333	23.2778	11.1111	NaN	NaN	NaN	NaN	NaN	NaN	NaN	NaN	NaN
1957-03-03	NaN	NaN	NaN	17.9444	23.8889	10.6111	NaN	NaN	NaN	NaN	NaN	NaN	NaN	NaN	NaN
1957-03-04	NaN	NaN	NaN	20.5556	25.6111	13.8889	NaN	NaN	NaN	NaN	NaN	NaN	NaN	NaN	NaN
1957-03-05	NaN	NaN	NaN	18.4444	24.3889	9.38889	NaN	NaN	NaN	NaN	NaN	NaN	NaN	NaN	NaN
1957-03-06	NaN	NaN	NaN	19	27.7778	6.72222	NaN	NaN	NaN	NaN	NaN	NaN	NaN	NaN	NaN
1957-03-07	NaN	NaN	NaN	19	25.6111	8.88889	NaN	NaN	NaN	NaN	NaN	NaN	NaN	NaN	NaN
1957-03-08	NaN	NaN	NaN	19.4444	27.7778	5	NaN	NaN	NaN	NaN	NaN	NaN	NaN	NaN	NaN
1957-03-09	NaN	NaN	NaN	19.3333	26.7222	7.22222	NaN	NaN	NaN	NaN	NaN	NaN	NaN	NaN	NaN
1957-03-10	NaN	NaN	NaN	17.2222	23.2778	8.27778	NaN	NaN	NaN	NaN	NaN	NaN	NaN	NaN	NaN
1957-03-11	NaN	NaN	NaN	15.6667	18.2778	12.7778	NaN	NaN	NaN	NaN	NaN	NaN	NaN	NaN	NaN
1957-03-12	NaN	NaN	NaN	19.1111	25	12.2222	NaN	NaN	NaN	NaN	NaN	NaN	NaN	NaN	NaN
1957-03-13	NaN	NaN	NaN	18.1111	25	10.6111	NaN	NaN	NaN	NaN	NaN	NaN	NaN	NaN	NaN
1957-03-14	NaN	NaN	NaN	20.4444	26.1111	9.38889	NaN	NaN	NaN	NaN	NaN	NaN	NaN	NaN	NaN
1957-03-15	NaN	NaN	NaN	21.3333	28.8889	8.27778	NaN	NaN	NaN	NaN	NaN	NaN	NaN	NaN	NaN
1957-03-16	NaN	NaN	NaN	21.3333	28.8889	6.11111	NaN	NaN	NaN	NaN	NaN	NaN	NaN	NaN	NaN
1957-03-17	NaN	NaN	NaN	21.4444	28.8889	8.27778	NaN	NaN	NaN	NaN	NaN	NaN	NaN	NaN	NaN
1957-03-18	NaN	NaN	NaN	20.3333	26.7222	7.77778	NaN	NaN	NaN	NaN	NaN	NaN	NaN	NaN	NaN
1957-03-19	NaN	NaN	NaN	17.7778	25	6.11111	NaN	NaN	NaN	NaN	NaN	NaN	NaN	NaN	NaN
1957-03-20	NaN	NaN	NaN	18	23.8889	7.22222	NaN	NaN	NaN	NaN	NaN	NaN	NaN	NaN	NaN
1957-03-21	NaN	NaN	NaN	21.1111	26.7222	13.2778	NaN	NaN	NaN	NaN	NaN	NaN	NaN	NaN	NaN
1957-03-22	NaN	NaN	NaN	20.7778	27.2222	8.88889	NaN	NaN	NaN	NaN	NaN	NaN	NaN	NaN	NaN
1957-03-23	NaN	NaN	NaN	20.2222	27.7778	6.11111	NaN	NaN	NaN	NaN	NaN	NaN	NaN	NaN	NaN
1957-03-24	NaN	NaN	NaN	20.4444	28.8889	7.77778	NaN	NaN	NaN	NaN	NaN	NaN	NaN	NaN	NaN
1957-03-25	NaN	NaN	NaN	20.1111	27.7778	8.27778	NaN	NaN	NaN	NaN	NaN	NaN	NaN	NaN	NaN
1957-03-26	NaN	NaN	NaN	17.8889	22.7778	9.38889	NaN	NaN	NaN	NaN	NaN	NaN	NaN	NaN	NaN
1957-03-27	NaN	NaN	NaN	21.3333	28.2778	11.1111	NaN	NaN	NaN	NaN	NaN	NaN	NaN	NaN	NaN
1957-03-28	NaN	NaN	NaN	17.6667	23.8889	7.77778	NaN	NaN	NaN	NaN	NaN	NaN	NaN	NaN	NaN
1957-03-29	NaN	NaN	NaN	16.7778	22.2222	10	NaN	NaN	NaN	NaN	NaN	NaN	NaN	NaN	NaN
1957-03-30	NaN	NaN	NaN	18.4444	25	12.2222	NaN	NaN	NaN	NaN	NaN	NaN	NaN	NaN	NaN
1957-03-31	NaN	NaN	NaN	18.2222	25.6111	6.72222	NaN	NaN	NaN	NaN	NaN	NaN	NaN	NaN	NaN
1957-04-01	NaN	NaN	NaN	19.2222	26.1111	7.77778	NaN	NaN	NaN	NaN	NaN	NaN	NaN	NaN	NaN
1957-04-02	NaN	NaN	NaN	19.3333	23.8889	12.2222	NaN	NaN	NaN	NaN	NaN	NaN	NaN	NaN	NaN
1957-04-03	NaN	NaN	NaN	19.2222	25	7.77778	NaN	NaN	NaN	NaN	NaN	NaN	NaN	NaN	NaN
1957-04-04	NaN	NaN	NaN	18.7778	23.2778	9.38889	NaN	NaN	NaN	NaN	NaN	NaN	NaN	NaN	NaN
1957-04-05	NaN	NaN	NaN	19.1111	26.1111	9.38889	NaN	NaN	NaN	NaN	NaN	NaN	NaN	NaN	NaN
1957-04-06	NaN	NaN	NaN	19.2222	27.2222	8.27778	NaN	NaN	NaN	NaN	NaN	NaN	NaN	NaN	NaN
1957-04-07	NaN	NaN	NaN	17.7778	24.3889	12.7778	NaN	NaN	NaN	NaN	NaN	NaN	NaN	NaN	NaN
1957-04-08	NaN	NaN	NaN	17	24.3889	7.22222	NaN	NaN	NaN	NaN	NaN	NaN	NaN	NaN	NaN
1957-04-09	NaN	NaN	NaN	18.5556	23.8889	10	NaN	NaN	NaN	NaN	NaN	NaN	NaN	NaN	NaN
1957-04-10	NaN	NaN	NaN	19.1111	25	8.88889	NaN	NaN	NaN	NaN	NaN	NaN	NaN	NaN	NaN
1957-04-11	NaN	NaN	NaN	19.1111	24.3889	8.27778	NaN	NaN	NaN	NaN	NaN	NaN	NaN	NaN	NaN
1957-04-12	NaN	NaN	NaN	19.8889	27.7778	9.38889	NaN	NaN	NaN	NaN	NaN	NaN	NaN	NaN	NaN
1957-04-13	NaN	NaN	NaN	18.3333	22.2222	13.8889	NaN	NaN	NaN	NaN	NaN	NaN	NaN	NaN	NaN
1957-04-14	NaN	NaN	NaN	18.6667	24.3889	13.2778	NaN	NaN	NaN	NaN	NaN	NaN	NaN	NaN	NaN
1957-04-15	NaN	NaN	NaN	19.6667	25.6111	13.8889	NaN	NaN	NaN	NaN	NaN	NaN	NaN	NaN	NaN
1957-04-16	NaN	NaN	NaN	19.6667	25	13.8889	NaN	NaN	NaN	NaN	NaN	NaN	NaN	NaN	NaN
1957-04-17	NaN	NaN	NaN	19.3333	26.1111	12.2222	NaN	NaN	NaN	NaN	NaN	NaN	NaN	NaN	NaN
1957-04-18	NaN	NaN	NaN	17	22.7778	9.38889	NaN	NaN	NaN	NaN	NaN	NaN	NaN	NaN	NaN
1957-04-19	NaN	NaN	NaN	19.1111	27.2222	8.27778	NaN	NaN	NaN	NaN	NaN	NaN	NaN	NaN	NaN
1957-04-20	NaN	NaN	NaN	20	26.7222	13.2778	NaN	NaN	NaN	NaN	NaN	NaN	NaN	NaN	NaN
1957-04-21	NaN	NaN	NaN	17.3333	22.2222	13.2778	NaN	NaN	NaN	NaN	NaN	NaN	NaN	NaN	NaN
1957-04-22	NaN	NaN	NaN	18.1111	21.1111	14.3889	NaN	NaN	NaN	NaN	NaN	NaN	NaN	NaN	NaN
1957-04-23	NaN	NaN	NaN	17.6667	22.2222	12.7778	NaN	NaN	NaN	NaN	NaN	NaN	NaN	NaN	NaN
1957-04-24	NaN	NaN	NaN	NaN	NaN	NaN	NaN	NaN	NaN	NaN	NaN	NaN	NaN	NaN	NaN
1957-04-25	NaN	NaN	NaN	NaN	NaN	NaN	NaN	NaN	NaN	NaN	NaN	NaN	NaN	NaN	NaN
1957-04-26	NaN	NaN	NaN	NaN	NaN	NaN	NaN	NaN	NaN	NaN	NaN	NaN	NaN	NaN	NaN
1957-04-27	NaN	NaN	NaN	NaN	NaN	NaN	NaN	NaN	NaN	NaN	NaN	NaN	NaN	NaN	NaN
1957-04-28	NaN	NaN	NaN	NaN	NaN	NaN	NaN	NaN	NaN	NaN	NaN	NaN	NaN	NaN	NaN
1957-04-29	NaN	NaN	NaN	NaN	NaN	NaN	NaN	NaN	NaN	NaN	NaN	NaN	NaN	NaN	NaN
1957-04-30	NaN	NaN	NaN	18.1111	24.3889	8.88889	NaN	NaN	NaN	NaN	NaN	NaN	NaN	NaN	NaN
1957-05-01	NaN	NaN	NaN	18	22.7778	10	NaN	NaN	NaN	NaN	NaN	NaN	NaN	NaN	NaN
1957-05-02	NaN	NaN	NaN	19.3333	23.2778	13.8889	NaN	NaN	NaN	NaN	NaN	NaN	NaN	NaN	NaN
1957-05-03	NaN	NaN	NaN	18.6667	23.2778	12.2222	NaN	NaN	NaN	NaN	NaN	NaN	NaN	NaN	NaN
1957-05-04	NaN	NaN	NaN	19	23.8889	15.6111	NaN	NaN	NaN	NaN	NaN	NaN	NaN	NaN	NaN
1957-05-05	NaN	NaN	NaN	18.4444	21.7222	15	NaN	NaN	NaN	NaN	NaN	NaN	NaN	NaN	NaN
1957-05-06	NaN	NaN	NaN	19.1111	24.3889	15	NaN	NaN	NaN	NaN	NaN	NaN	NaN	NaN	NaN
1957-05-07	NaN	NaN	NaN	17.8889	22.2222	14.3889	NaN	NaN	NaN	NaN	NaN	NaN	NaN	NaN	NaN
1957-05-08	NaN	NaN	NaN	18.6667	22.2222	12.7778	NaN	NaN	NaN	NaN	NaN	NaN	NaN	NaN	NaN
1957-05-09	NaN	NaN	NaN	17.7778	22.2222	13.8889	NaN	NaN	NaN	NaN	NaN	NaN	NaN	NaN	NaN
1957-05-10	NaN	NaN	NaN	17.7778	23.2778	12.7778	NaN	NaN	NaN	NaN	NaN	NaN	NaN	NaN	NaN
1957-05-11	NaN	NaN	NaN	18.8333	22.2222	14.3889	NaN	NaN	NaN	NaN	NaN	NaN	NaN	NaN	NaN
1957-05-12	NaN	NaN	NaN	18.3333	22.7778	11.1111	NaN	NaN	NaN	NaN	NaN	NaN	NaN	NaN	NaN
1957-05-13	NaN	NaN	NaN	18.1111	22.2222	11.7222	NaN	NaN	NaN	NaN	NaN	NaN	NaN	NaN	NaN
1957-05-14	NaN	NaN	NaN	18.1111	22.2222	13.2778	NaN	NaN	NaN	NaN	NaN	NaN	NaN	NaN	NaN
1957-05-15	NaN	NaN	NaN	19.2222	22.7778	14.3889	NaN	NaN	NaN	NaN	NaN	NaN	NaN	NaN	NaN
1957-05-16	NaN	NaN	NaN	19.5556	23.8889	13.8889	NaN	NaN	NaN	NaN	NaN	NaN	NaN	NaN	NaN
1957-05-17	NaN	NaN	NaN	18.6667	21.1111	14.3889	NaN	NaN	NaN	NaN	NaN	NaN	NaN	NaN	NaN
1957-05-18	NaN	NaN	NaN	18.8889	23.2778	12.7778	NaN	NaN	NaN	NaN	NaN	NaN	NaN	NaN	NaN
1957-05-19	NaN	NaN	NaN	17.2222	21.7222	9.38889	NaN	NaN	NaN	NaN	NaN	NaN	NaN	NaN	NaN
1957-05-20	NaN	NaN	NaN	17.2222	21.1111	9.38889	NaN	NaN	NaN	NaN	NaN	NaN	NaN	NaN	NaN
1957-05-21	NaN	NaN	NaN	17.6667	21.7222	14.3889	NaN	NaN	NaN	NaN	NaN	NaN	NaN	NaN	NaN
1957-05-22	NaN	NaN	NaN	17.4444	22.2222	10	NaN	NaN	NaN	NaN	NaN	NaN	NaN	NaN	NaN
1957-05-23	NaN	NaN	NaN	16.5556	21.7222	8.27778	NaN	NaN	NaN	NaN	NaN	NaN	NaN	NaN	NaN
1957-05-24	NaN	NaN	NaN	17.4444	23.8889	7.77778	NaN	NaN	NaN	NaN	NaN	NaN	NaN	NaN	NaN
1957-05-25	NaN	NaN	NaN	18.6667	24.3889	8.88889	NaN	NaN	NaN	NaN	NaN	NaN	NaN	NaN	NaN
1957-05-26	NaN	NaN	NaN	18.1111	25	8.88889	NaN	NaN	NaN	NaN	NaN	NaN	NaN	NaN	NaN
1957-05-27	NaN	NaN	NaN	19.8889	23.8889	13.2778	NaN	NaN	NaN	NaN	NaN	NaN	NaN	NaN	NaN
1957-05-28	NaN	NaN	NaN	19.4444	23.2778	14.3889	NaN	NaN	NaN	NaN	NaN	NaN	NaN	NaN	NaN
1957-05-29	NaN	NaN	NaN	17	18.8889	15	NaN	NaN	NaN	NaN	NaN	NaN	NaN	NaN	NaN
1957-05-30	NaN	NaN	NaN	17.8889	20.6111	15	NaN	NaN	NaN	NaN	NaN	NaN	NaN	NaN	NaN
1957-05-31	NaN	NaN	NaN	17.2222	22.2222	14.3889	NaN	NaN	NaN	NaN	NaN	NaN	NaN	NaN	NaN
1957-06-01	NaN	NaN	NaN	16.4444	21.7222	12.2222	NaN	NaN	NaN	NaN	NaN	NaN	NaN	NaN	NaN
1957-06-02	NaN	NaN	NaN	19	23.2778	12.7778	NaN	NaN	NaN	NaN	NaN	NaN	NaN	NaN	NaN
1957-06-03	NaN	NaN	NaN	18.8333	24.3889	9.38889	NaN	NaN	NaN	NaN	NaN	NaN	NaN	NaN	NaN
1957-06-04	NaN	NaN	NaN	17.7778	21.7222	13.8889	NaN	NaN	NaN	NaN	NaN	NaN	NaN	NaN	NaN
1957-06-05	NaN	NaN	NaN	17.5556	23.8889	8.27778	NaN	NaN	NaN	NaN	NaN	NaN	NaN	NaN	NaN
1957-06-06	NaN	NaN	NaN	19.5556	24.3889	12.7778	NaN	NaN	NaN	NaN	NaN	NaN	NaN	NaN	NaN
1957-06-07	NaN	NaN	NaN	17.7778	21.7222	11.7222	NaN	NaN	NaN	NaN	NaN	NaN	NaN	NaN	NaN
1957-06-08	NaN	NaN	NaN	19.2222	26.1111	11.1111	NaN	NaN	NaN	NaN	NaN	NaN	NaN	NaN	NaN
1957-06-09	NaN	NaN	NaN	16.4444	23.8889	7.22222	NaN	NaN	NaN	NaN	NaN	NaN	NaN	NaN	NaN
1957-06-10	NaN	NaN	NaN	16.6667	23.2778	7.22222	NaN	NaN	NaN	NaN	NaN	NaN	NaN	NaN	NaN
1957-06-11	NaN	NaN	NaN	16.7778	21.1111	8.88889	NaN	NaN	NaN	NaN	NaN	NaN	NaN	NaN	NaN
1957-06-12	NaN	NaN	NaN	17.8889	22.2222	12.2222	NaN	NaN	NaN	NaN	NaN	NaN	NaN	NaN	NaN
1957-06-13	NaN	NaN	NaN	18.5556	22.2222	12.7778	NaN	NaN	NaN	NaN	NaN	NaN	NaN	NaN	NaN
1957-06-14	NaN	NaN	NaN	17.4444	22.7778	7.22222	NaN	NaN	NaN	NaN	NaN	NaN	NaN	NaN	NaN
1957-06-15	NaN	NaN	NaN	18.5556	23.8889	10.6111	NaN	NaN	NaN	NaN	NaN	NaN	NaN	NaN	NaN
1957-06-16	NaN	NaN	NaN	16.8889	20	11.1111	NaN	NaN	NaN	NaN	NaN	NaN	NaN	NaN	NaN
1957-06-17	NaN	NaN	NaN	17.5556	22.2222	11.1111	NaN	NaN	NaN	NaN	NaN	NaN	NaN	NaN	NaN
1957-06-18	NaN	NaN	NaN	16.5556	23.8889	6.11111	NaN	NaN	NaN	NaN	NaN	NaN	NaN	NaN	NaN
1957-06-19	NaN	NaN	NaN	16.1111	25	5	NaN	NaN	NaN	NaN	NaN	NaN	NaN	NaN	NaN
1957-06-20	NaN	NaN	NaN	18.4444	23.2778	11.7222	NaN	NaN	NaN	NaN	NaN	NaN	NaN	NaN	NaN
1957-06-21	NaN	NaN	NaN	17.3333	26.1111	6.72222	NaN	NaN	NaN	NaN	NaN	NaN	NaN	NaN	NaN
1957-06-22	NaN	NaN	NaN	17.6667	21.7222	15	NaN	NaN	NaN	NaN	NaN	NaN	NaN	NaN	NaN
1957-06-23	NaN	NaN	NaN	16.2222	20.6111	13.8889	NaN	NaN	NaN	NaN	NaN	NaN	NaN	NaN	NaN
1957-06-24	NaN	NaN	NaN	16.4444	20	12.7778	NaN	NaN	NaN	NaN	NaN	NaN	NaN	NaN	NaN
1957-06-25	NaN	NaN	NaN	15.6667	20.6111	9.38889	NaN	NaN	NaN	NaN	NaN	NaN	NaN	NaN	NaN
1957-06-26	NaN	NaN	NaN	16.1111	20.6111	10	NaN	NaN	NaN	NaN	NaN	NaN	NaN	NaN	NaN
1957-06-27	NaN	NaN	NaN	16.8889	22.7778	11.7222	NaN	NaN	NaN	NaN	NaN	NaN	NaN	NaN	NaN
1957-06-28	NaN	NaN	NaN	16.5556	22.7778	9.38889	NaN	NaN	NaN	NaN	NaN	NaN	NaN	NaN	NaN
1957-06-29	NaN	NaN	NaN	16	22.2222	7.22222	NaN	NaN	NaN	NaN	NaN	NaN	NaN	NaN	NaN
1957-06-30	NaN	NaN	NaN	16.7778	20.6111	8.88889	NaN	NaN	NaN	NaN	NaN	NaN	NaN	NaN	NaN
1957-07-01	NaN	NaN	NaN	16	22.7778	5.61111	NaN	NaN	NaN	NaN	NaN	NaN	NaN	NaN	NaN
1957-07-02	NaN	NaN	NaN	17	24.3889	6.72222	NaN	NaN	NaN	NaN	NaN	NaN	NaN	NaN	NaN
1957-07-03	NaN	NaN	NaN	17.2222	23.2778	9.38889	NaN	NaN	NaN	NaN	NaN	NaN	NaN	NaN	NaN
1957-07-04	NaN	NaN	NaN	16.5556	21.1111	7.77778	NaN	NaN	NaN	NaN	NaN	NaN	NaN	NaN	NaN
1957-07-05	NaN	NaN	NaN	15.3333	23.8889	4.38889	NaN	NaN	NaN	NaN	NaN	NaN	NaN	NaN	NaN
1957-07-06	NaN	NaN	NaN	15.1111	21.7222	5	NaN	NaN	NaN	NaN	NaN	NaN	NaN	NaN	NaN
1957-07-07	NaN	NaN	NaN	16.3333	21.7222	9.38889	NaN	NaN	NaN	NaN	NaN	NaN	NaN	NaN	NaN
1957-07-08	NaN	NaN	NaN	16.7778	22.7778	9.38889	NaN	NaN	NaN	NaN	NaN	NaN	NaN	NaN	NaN
1957-07-09	NaN	NaN	NaN	18	24.3889	12.2222	NaN	NaN	NaN	NaN	NaN	NaN	NaN	NaN	NaN
1957-07-10	NaN	NaN	NaN	17.4444	22.7778	12.7778	NaN	NaN	NaN	NaN	NaN	NaN	NaN	NaN	NaN
1957-07-11	NaN	NaN	NaN	16.7778	20	13.2778	NaN	NaN	NaN	NaN	NaN	NaN	NaN	NaN	NaN
1957-07-12	NaN	NaN	NaN	18.3333	22.7778	12.2222	NaN	NaN	NaN	NaN	NaN	NaN	NaN	NaN	NaN
1957-07-13	NaN	NaN	NaN	18.4444	23.2778	12.2222	NaN	NaN	NaN	NaN	NaN	NaN	NaN	NaN	NaN
1957-07-14	NaN	NaN	NaN	17.5556	24.3889	7.77778	NaN	NaN	NaN	NaN	NaN	NaN	NaN	NaN	NaN
1957-07-15	NaN	NaN	NaN	17.6667	23.8889	9.38889	NaN	NaN	NaN	NaN	NaN	NaN	NaN	NaN	NaN
1957-07-16	NaN	NaN	NaN	17.7778	21.7222	12.7778	NaN	NaN	NaN	NaN	NaN	NaN	NaN	NaN	NaN
1957-07-17	NaN	NaN	NaN	16	19.3889	12.7778	NaN	NaN	NaN	NaN	NaN	NaN	NaN	NaN	NaN
1957-07-18	NaN	NaN	NaN	15.3333	19.3889	7.22222	NaN	NaN	NaN	NaN	NaN	NaN	NaN	NaN	NaN
1957-07-19	NaN	NaN	NaN	15.7778	20.6111	6.11111	NaN	NaN	NaN	NaN	NaN	NaN	NaN	NaN	NaN
1957-07-20	NaN	NaN	NaN	16.8889	23.2778	6.11111	NaN	NaN	NaN	NaN	NaN	NaN	NaN	NaN	NaN
1957-07-21	NaN	NaN	NaN	17.5556	24.3889	10	NaN	NaN	NaN	NaN	NaN	NaN	NaN	NaN	NaN
1957-07-22	NaN	NaN	NaN	18.6667	24.3889	12.7778	NaN	NaN	NaN	NaN	NaN	NaN	NaN	NaN	NaN
1957-07-23	NaN	NaN	NaN	17.8889	23.8889	11.1111	NaN	NaN	NaN	NaN	NaN	NaN	NaN	NaN	NaN
1957-07-24	NaN	NaN	NaN	15.4444	18.8889	7.77778	NaN	NaN	NaN	NaN	NaN	NaN	NaN	NaN	NaN
1957-07-25	NaN	NaN	NaN	18.2222	23.8889	11.1111	NaN	NaN	NaN	NaN	NaN	NaN	NaN	NaN	NaN
1957-07-26	NaN	NaN	NaN	18	20.6111	14.3889	NaN	NaN	NaN	NaN	NaN	NaN	NaN	NaN	NaN
1957-07-27	NaN	NaN	NaN	16.8889	24.3889	7.77778	NaN	NaN	NaN	NaN	NaN	NaN	NaN	NaN	NaN
1957-07-28	NaN	NaN	NaN	18.5556	23.8889	11.7222	NaN	NaN	NaN	NaN	NaN	NaN	NaN	NaN	NaN
1957-07-29	NaN	NaN	NaN	18	24.3889	10	NaN	NaN	NaN	NaN	NaN	NaN	NaN	NaN	NaN
1957-07-30	NaN	NaN	NaN	17.5556	23.2778	12.7778	NaN	NaN	NaN	NaN	NaN	NaN	NaN	NaN	NaN
1957-07-31	NaN	NaN	NaN	16.8889	21.7222	12.2222	NaN	NaN	NaN	NaN	NaN	NaN	NaN	NaN	NaN
1957-08-01	NaN	NaN	NaN	17.7778	21.7222	12.7778	NaN	NaN	NaN	NaN	NaN	NaN	NaN	NaN	NaN
1957-08-02	NaN	NaN	NaN	17.1111	23.8889	7.77778	NaN	NaN	NaN	NaN	NaN	NaN	NaN	NaN	NaN
1957-08-03	NaN	NaN	NaN	17.8889	22.2222	13.8889	NaN	NaN	NaN	NaN	NaN	NaN	NaN	NaN	NaN
1957-08-04	NaN	NaN	NaN	15.8889	20.6111	12.2222	NaN	NaN	NaN	NaN	NaN	NaN	NaN	NaN	NaN
1957-08-05	NaN	NaN	NaN	17.3333	21.7222	13.2778	NaN	NaN	NaN	NaN	NaN	NaN	NaN	NaN	NaN
1957-08-06	NaN	NaN	NaN	17.1111	22.2222	10	NaN	NaN	NaN	NaN	NaN	NaN	NaN	NaN	NaN
1957-08-07	NaN	NaN	NaN	15.8889	21.1111	9.38889	NaN	NaN	NaN	NaN	NaN	NaN	NaN	NaN	NaN
1957-08-08	NaN	NaN	NaN	17.4444	21.7222	12.2222	NaN	NaN	NaN	NaN	NaN	NaN	NaN	NaN	NaN
1957-08-09	NaN	NaN	NaN	16.4444	21.1111	7.22222	NaN	NaN	NaN	NaN	NaN	NaN	NaN	NaN	NaN
1957-08-10	NaN	NaN	NaN	16.8333	22.2222	10	NaN	NaN	NaN	NaN	NaN	NaN	NaN	NaN	NaN
1957-08-11	NaN	NaN	NaN	17.3333	23.2778	7.77778	NaN	NaN	NaN	NaN	NaN	NaN	NaN	NaN	NaN
1957-08-12	NaN	NaN	NaN	16.1111	23.2778	5	NaN	NaN	NaN	NaN	NaN	NaN	NaN	NaN	NaN
1957-08-13	NaN	NaN	NaN	16.2222	25.6111	5.61111	NaN	NaN	NaN	NaN	NaN	NaN	NaN	NaN	NaN
1957-08-14	NaN	NaN	NaN	16.6667	25	8.88889	NaN	NaN	NaN	NaN	NaN	NaN	NaN	NaN	NaN
1957-08-15	NaN	NaN	NaN	15.7778	21.1111	7.77778	NaN	NaN	NaN	NaN	NaN	NaN	NaN	NaN	NaN
1957-08-16	NaN	NaN	NaN	16.5556	22.2222	6.11111	NaN	NaN	NaN	NaN	NaN	NaN	NaN	NaN	NaN
1957-08-17	NaN	NaN	NaN	16.6667	23.8889	5	NaN	NaN	NaN	NaN	NaN	NaN	NaN	NaN	NaN
1957-08-18	NaN	NaN	NaN	16.7778	22.2222	7.22222	NaN	NaN	NaN	NaN	NaN	NaN	NaN	NaN	NaN
1957-08-19	NaN	NaN	NaN	17.3333	22.7778	10	NaN	NaN	NaN	NaN	NaN	NaN	NaN	NaN	NaN
1957-08-20	NaN	NaN	NaN	16.4444	22.7778	6.11111	NaN	NaN	NaN	NaN	NaN	NaN	NaN	NaN	NaN
1957-08-21	NaN	NaN	NaN	16.3333	25	5.61111	NaN	NaN	NaN	NaN	NaN	NaN	NaN	NaN	NaN
1957-08-22	NaN	NaN	NaN	17	22.2222	9.38889	NaN	NaN	NaN	NaN	NaN	NaN	NaN	NaN	NaN
1957-08-23	NaN	NaN	NaN	17.2222	21.7222	11.7222	NaN	NaN	NaN	NaN	NaN	NaN	NaN	NaN	NaN
1957-08-24	NaN	NaN	NaN	17.6667	23.2778	12.7778	NaN	NaN	NaN	NaN	NaN	NaN	NaN	NaN	NaN
1957-08-25	NaN	NaN	NaN	16.7778	21.1111	10	NaN	NaN	NaN	NaN	NaN	NaN	NaN	NaN	NaN
1957-08-26	NaN	NaN	NaN	16.3333	23.8889	7.22222	NaN	NaN	NaN	NaN	NaN	NaN	NaN	NaN	NaN
1957-08-27	NaN	NaN	NaN	16	22.2222	8.27778	NaN	NaN	NaN	NaN	NaN	NaN	NaN	NaN	NaN
1957-08-28	NaN	NaN	NaN	15.2222	18.8889	10	NaN	NaN	NaN	NaN	NaN	NaN	NaN	NaN	NaN
1957-08-29	NaN	NaN	NaN	17.2222	21.1111	13.2778	NaN	NaN	NaN	NaN	NaN	NaN	NaN	NaN	NaN
1957-08-30	NaN	NaN	NaN	15	18.8889	5.61111	NaN	NaN	NaN	NaN	NaN	NaN	NaN	NaN	NaN
1957-08-31	NaN	NaN	NaN	15.1111	21.1111	5.61111	NaN	NaN	NaN	NaN	NaN	NaN	NaN	NaN	NaN
1957-09-01	NaN	NaN	NaN	17.5556	25	7.22222	NaN	NaN	NaN	NaN	NaN	NaN	NaN	NaN	NaN
1957-09-02	NaN	NaN	NaN	17.2222	24.3889	4.38889	NaN	NaN	NaN	NaN	NaN	NaN	NaN	NaN	NaN
1957-09-03	NaN	NaN	NaN	17.1111	24.3889	5.61111	NaN	NaN	NaN	NaN	NaN	NaN	NaN	NaN	NaN
1957-09-04	NaN	NaN	NaN	16.2222	23.2778	4.38889	NaN	NaN	NaN	NaN	NaN	NaN	NaN	NaN	NaN
1957-09-05	NaN	NaN	NaN	15.5	23.2778	4.38889	NaN	NaN	NaN	NaN	NaN	NaN	NaN	NaN	NaN
1957-09-06	NaN	NaN	NaN	16.2222	23.8889	5	NaN	NaN	NaN	NaN	NaN	NaN	NaN	NaN	NaN
1957-09-07	NaN	NaN	NaN	15.9444	21.7222	5	NaN	NaN	NaN	NaN	NaN	NaN	NaN	NaN	NaN
1957-09-08	NaN	NaN	NaN	16	23.2778	4.38889	NaN	NaN	NaN	NaN	NaN	NaN	NaN	NaN	NaN
1957-09-09	NaN	NaN	NaN	17.5556	24.3889	4.38889	NaN	NaN	NaN	NaN	NaN	NaN	NaN	NaN	NaN
1957-09-10	NaN	NaN	NaN	15.5556	21.7222	10	NaN	NaN	NaN	NaN	NaN	NaN	NaN	NaN	NaN
1957-09-11	NaN	NaN	NaN	17.7778	22.2222	11.1111	NaN	NaN	NaN	NaN	NaN	NaN	NaN	NaN	NaN
1957-09-12	NaN	NaN	NaN	17.1111	24.3889	6.11111	NaN	NaN	NaN	NaN	NaN	NaN	NaN	NaN	NaN
1957-09-13	NaN	NaN	NaN	15.7222	24.3889	5	NaN	NaN	NaN	NaN	NaN	NaN	NaN	NaN	NaN
1957-09-14	NaN	NaN	NaN	18.7778	26.7222	6.11111	NaN	NaN	NaN	NaN	NaN	NaN	NaN	NaN	NaN
1957-09-15	NaN	NaN	NaN	18.5556	26.1111	7.22222	NaN	NaN	NaN	NaN	NaN	NaN	NaN	NaN	NaN
1957-09-16	NaN	NaN	NaN	18	21.7222	12.2222	NaN	NaN	NaN	NaN	NaN	NaN	NaN	NaN	NaN
1957-09-17	NaN	NaN	NaN	17.3333	24.3889	7.22222	NaN	NaN	NaN	NaN	NaN	NaN	NaN	NaN	NaN
1957-09-18	NaN	NaN	NaN	18.1111	26.7222	6.11111	NaN	NaN	NaN	NaN	NaN	NaN	NaN	NaN	NaN
1957-09-19	NaN	NaN	NaN	17.1111	25.6111	5	NaN	NaN	NaN	NaN	NaN	NaN	NaN	NaN	NaN
1957-09-20	NaN	NaN	NaN	17.7778	23.2778	5.61111	NaN	NaN	NaN	NaN	NaN	NaN	NaN	NaN	NaN
1957-09-21	NaN	NaN	NaN	19.1111	25	8.88889	NaN	NaN	NaN	NaN	NaN	NaN	NaN	NaN	NaN
1957-09-22	NaN	NaN	NaN	18.4444	25	5	NaN	NaN	NaN	NaN	NaN	NaN	NaN	NaN	NaN
1957-09-23	NaN	NaN	NaN	18.3333	24.3889	4.38889	NaN	NaN	NaN	NaN	NaN	NaN	NaN	NaN	NaN
1957-09-24	NaN	NaN	NaN	18.1111	27.2222	3.27778	NaN	NaN	NaN	NaN	NaN	NaN	NaN	NaN	NaN
1957-09-25	NaN	NaN	NaN	17.6667	24.3889	3.88889	NaN	NaN	NaN	NaN	NaN	NaN	NaN	NaN	NaN
1957-09-26	NaN	NaN	NaN	17.7778	25	10	NaN	NaN	NaN	NaN	NaN	NaN	NaN	NaN	NaN
1957-09-27	NaN	NaN	NaN	19.2222	25.6111	10	NaN	NaN	NaN	NaN	NaN	NaN	NaN	NaN	NaN
1957-09-28	NaN	NaN	NaN	18	26.7222	4.38889	NaN	NaN	NaN	NaN	NaN	NaN	NaN	NaN	NaN
1957-09-29	NaN	NaN	NaN	18.6667	25.6111	8.88889	NaN	NaN	NaN	NaN	NaN	NaN	NaN	NaN	NaN
1957-09-30	NaN	NaN	NaN	15.8889	23.8889	7.77778	NaN	NaN	NaN	NaN	NaN	NaN	NaN	NaN	NaN
1957-10-01	NaN	NaN	NaN	17.4444	26.1111	5.61111	NaN	NaN	NaN	NaN	NaN	NaN	NaN	NaN	NaN
1957-10-02	NaN	NaN	NaN	17.3333	23.8889	5.61111	NaN	NaN	NaN	NaN	NaN	NaN	NaN	NaN	NaN
1957-10-03	NaN	NaN	NaN	20.6667	23.8889	16.1111	NaN	NaN	NaN	NaN	NaN	NaN	NaN	NaN	NaN
1957-10-04	NaN	NaN	NaN	19	26.7222	6.72222	NaN	NaN	NaN	NaN	NaN	NaN	NaN	NaN	NaN
1957-10-05	NaN	NaN	NaN	20.6667	27.7778	11.7222	NaN	NaN	NaN	NaN	NaN	NaN	NaN	NaN	NaN
1957-10-06	NaN	NaN	NaN	18.4444	25	8.88889	NaN	NaN	NaN	NaN	NaN	NaN	NaN	NaN	NaN
1957-10-07	NaN	NaN	NaN	17.7778	23.2778	10	NaN	NaN	NaN	NaN	NaN	NaN	NaN	NaN	NaN
1957-10-08	NaN	NaN	NaN	17.8889	24.3889	6.72222	NaN	NaN	NaN	NaN	NaN	NaN	NaN	NaN	NaN
1957-10-09	NaN	NaN	NaN	18.5556	26.7222	5	NaN	NaN	NaN	NaN	NaN	NaN	NaN	NaN	NaN
1957-10-10	NaN	NaN	NaN	18.6667	25.6111	4.38889	NaN	NaN	NaN	NaN	NaN	NaN	NaN	NaN	NaN
1957-10-11	NaN	NaN	NaN	18.2222	22.7778	6.72222	NaN	NaN	NaN	NaN	NaN	NaN	NaN	NaN	NaN
1957-10-12	NaN	NaN	NaN	19.2222	27.7778	7.22222	NaN	NaN	NaN	NaN	NaN	NaN	NaN	NaN	NaN
1957-10-13	NaN	NaN	NaN	19	25.6111	6.11111	NaN	NaN	NaN	NaN	NaN	NaN	NaN	NaN	NaN
1957-10-14	NaN	NaN	NaN	19	25	6.72222	NaN	NaN	NaN	NaN	NaN	NaN	NaN	NaN	NaN
1957-10-15	NaN	NaN	NaN	20.2222	26.1111	12.7778	NaN	NaN	NaN	NaN	NaN	NaN	NaN	NaN	NaN
1957-10-16	NaN	NaN	NaN	18.6667	25.6111	7.77778	NaN	NaN	NaN	NaN	NaN	NaN	NaN	NaN	NaN
1957-10-17	NaN	NaN	NaN	18.8889	23.8889	11.7222	NaN	NaN	NaN	NaN	NaN	NaN	NaN	NaN	NaN
1957-10-18	NaN	NaN	NaN	18.1111	25	5	NaN	NaN	NaN	NaN	NaN	NaN	NaN	NaN	NaN
1957-10-19	NaN	NaN	NaN	19.1667	25.6111	5.61111	NaN	NaN	NaN	NaN	NaN	NaN	NaN	NaN	NaN
1957-10-20	NaN	NaN	NaN	18.8333	24.3889	4.38889	NaN	NaN	NaN	NaN	NaN	NaN	NaN	NaN	NaN
1957-10-21	NaN	NaN	NaN	19.8889	26.7222	5.61111	NaN	NaN	NaN	NaN	NaN	NaN	NaN	NaN	NaN
1957-10-22	NaN	NaN	NaN	18.5556	25.6111	5	NaN	NaN	NaN	NaN	NaN	NaN	NaN	NaN	NaN
1957-10-23	NaN	NaN	NaN	18	22.7778	8.27778	NaN	NaN	NaN	NaN	NaN	NaN	NaN	NaN	NaN
1957-10-24	NaN	NaN	NaN	17.7778	23.2778	8.88889	NaN	NaN	NaN	NaN	NaN	NaN	NaN	NaN	NaN
1957-10-25	NaN	NaN	NaN	19.3333	25.6111	8.27778	NaN	NaN	NaN	NaN	NaN	NaN	NaN	NaN	NaN
1957-10-26	NaN	NaN	NaN	17.2222	21.1111	8.88889	NaN	NaN	NaN	NaN	NaN	NaN	NaN	NaN	NaN
1957-10-27	NaN	NaN	NaN	19.2222	24.3889	11.1111	NaN	NaN	NaN	NaN	NaN	NaN	NaN	NaN	NaN
1957-10-28	NaN	NaN	NaN	16.7778	23.2778	7.77778	NaN	NaN	NaN	NaN	NaN	NaN	NaN	NaN	NaN
1957-10-29	NaN	NaN	NaN	15.6667	17.2222	12.7778	NaN	NaN	NaN	NaN	NaN	NaN	NaN	NaN	NaN
1957-10-30	NaN	NaN	NaN	17.4444	22.2222	10	NaN	NaN	NaN	NaN	NaN	NaN	NaN	NaN	NaN
1957-10-31	NaN	NaN	NaN	18	23.8889	7.77778	NaN	NaN	NaN	NaN	NaN	NaN	NaN	NaN	NaN
1957-11-01	NaN	NaN	NaN	17	19.3889	12.2222	NaN	NaN	NaN	NaN	NaN	NaN	NaN	NaN	NaN
1957-11-02	NaN	NaN	NaN	17.3333	25.6111	5.61111	NaN	NaN	NaN	NaN	NaN	NaN	NaN	NaN	NaN
1957-11-03	NaN	NaN	NaN	18.3333	25	10	NaN	NaN	NaN	NaN	NaN	NaN	NaN	NaN	NaN
1957-11-04	NaN	NaN	NaN	16.4444	22.2222	8.27778	NaN	NaN	NaN	NaN	NaN	NaN	NaN	NaN	NaN
1957-11-05	NaN	NaN	NaN	17.8889	21.7222	13.2778	NaN	NaN	NaN	NaN	NaN	NaN	NaN	NaN	NaN
1957-11-06	NaN	NaN	NaN	19.4444	26.7222	7.22222	NaN	NaN	NaN	NaN	NaN	NaN	NaN	NaN	NaN
1957-11-07	NaN	NaN	NaN	17.7778	25	3.27778	NaN	NaN	NaN	NaN	NaN	NaN	NaN	NaN	NaN
1957-11-08	NaN	NaN	NaN	18	24.3889	5.61111	NaN	NaN	NaN	NaN	NaN	NaN	NaN	NaN	NaN
1957-11-09	NaN	NaN	NaN	17.3333	24.3889	6.11111	NaN	NaN	NaN	NaN	NaN	NaN	NaN	NaN	NaN
1957-11-10	NaN	NaN	NaN	19.4444	25	11.1111	NaN	NaN	NaN	NaN	NaN	NaN	NaN	NaN	NaN
1957-11-11	NaN	NaN	NaN	19.1111	24.3889	12.2222	NaN	NaN	NaN	NaN	NaN	NaN	NaN	NaN	NaN
1957-11-12	NaN	NaN	NaN	19.1111	27.2222	11.7222	NaN	NaN	NaN	NaN	NaN	NaN	NaN	NaN	NaN
1957-11-13	NaN	NaN	NaN	19.3333	24.3889	12.7778	NaN	NaN	NaN	NaN	NaN	NaN	NaN	NaN	NaN
1957-11-14	NaN	NaN	NaN	20.4444	25.6111	10.6111	NaN	NaN	NaN	NaN	NaN	NaN	NaN	NaN	NaN
1957-11-15	NaN	NaN	NaN	18.2222	23.8889	7.22222	NaN	NaN	NaN	NaN	NaN	NaN	NaN	NaN	NaN
1957-11-16	NaN	NaN	NaN	18.2222	26.1111	4.38889	NaN	NaN	NaN	NaN	NaN	NaN	NaN	NaN	NaN
1957-11-17	NaN	NaN	NaN	17.6667	22.2222	12.7778	NaN	NaN	NaN	NaN	NaN	NaN	NaN	NaN	NaN
1957-11-18	NaN	NaN	NaN	17.4444	21.1111	14.3889	NaN	NaN	NaN	NaN	NaN	NaN	NaN	NaN	NaN
1957-11-19	NaN	NaN	NaN	18.2222	23.2778	11.1111	NaN	NaN	NaN	NaN	NaN	NaN	NaN	NaN	NaN
1957-11-20	NaN	NaN	NaN	20.5556	25	12.7778	NaN	NaN	NaN	NaN	NaN	NaN	NaN	NaN	NaN
1957-11-21	NaN	NaN	NaN	16.8889	21.1111	6.72222	NaN	NaN	NaN	NaN	NaN	NaN	NaN	NaN	NaN
1957-11-22	NaN	NaN	NaN	18.5556	25.6111	6.72222	NaN	NaN	NaN	NaN	NaN	NaN	NaN	NaN	NaN
1957-11-23	NaN	NaN	NaN	17.7778	22.2222	11.1111	NaN	NaN	NaN	NaN	NaN	NaN	NaN	NaN	NaN
1957-11-24	NaN	NaN	NaN	16.3333	20.6111	8.27778	NaN	NaN	NaN	NaN	NaN	NaN	NaN	NaN	NaN
1957-11-25	NaN	NaN	NaN	16.7778	20	13.8889	NaN	NaN	NaN	NaN	NaN	NaN	NaN	NaN	NaN
1957-11-26	NaN	NaN	NaN	16.4444	21.1111	11.7222	NaN	NaN	NaN	NaN	NaN	NaN	NaN	NaN	NaN
1957-11-27	NaN	NaN	NaN	16	18.2778	11.7222	NaN	NaN	NaN	NaN	NaN	NaN	NaN	NaN	NaN
1957-11-28	NaN	NaN	NaN	17.6667	22.2222	11.1111	NaN	NaN	NaN	NaN	NaN	NaN	NaN	NaN	NaN
1957-11-29	NaN	NaN	NaN	17.4444	21.7222	8.88889	NaN	NaN	NaN	NaN	NaN	NaN	NaN	NaN	NaN
1957-11-30	NaN	NaN	NaN	16.4444	19.3889	11.1111	NaN	NaN	NaN	NaN	NaN	NaN	NaN	NaN	NaN
1957-12-01	NaN	NaN	NaN	17.6667	21.1111	11.1111	NaN	NaN	NaN	NaN	NaN	NaN	NaN	NaN	NaN
1957-12-02	NaN	NaN	NaN	16.6667	20	12.7778	NaN	NaN	NaN	NaN	NaN	NaN	NaN	NaN	NaN
1957-12-03	NaN	NaN	NaN	16.9444	20.6111	13.8889	NaN	NaN	NaN	NaN	NaN	NaN	NaN	NaN	NaN
1957-12-04	NaN	NaN	NaN	17.5556	20	13.8889	NaN	NaN	NaN	NaN	NaN	NaN	NaN	NaN	NaN
1957-12-05	NaN	NaN	NaN	19.7778	22.7778	14.3889	NaN	NaN	NaN	NaN	NaN	NaN	NaN	NaN	NaN
1957-12-06	NaN	NaN	NaN	16.7222	20.6111	12.7778	NaN	NaN	NaN	NaN	NaN	NaN	NaN	NaN	NaN
1957-12-07	NaN	NaN	NaN	18.5556	22.2222	11.7222	NaN	NaN	NaN	NaN	NaN	NaN	NaN	NaN	NaN
1957-12-08	NaN	NaN	NaN	17.5556	22.7778	8.88889	NaN	NaN	NaN	NaN	NaN	NaN	NaN	NaN	NaN
1957-12-09	NaN	NaN	NaN	17.2222	19.3889	13.8889	NaN	NaN	NaN	NaN	NaN	NaN	NaN	NaN	NaN
1957-12-10	NaN	NaN	NaN	16.1111	18.2778	12.7778	NaN	NaN	NaN	NaN	NaN	NaN	NaN	NaN	NaN
1957-12-11	NaN	NaN	NaN	18.2222	22.2222	12.7778	NaN	NaN	NaN	NaN	NaN	NaN	NaN	NaN	NaN
1957-12-12	NaN	NaN	NaN	19.5556	22.7778	12.7778	NaN	NaN	NaN	NaN	NaN	NaN	NaN	NaN	NaN
1957-12-13	NaN	NaN	NaN	20	23.8889	13.8889	NaN	NaN	NaN	NaN	NaN	NaN	NaN	NaN	NaN
1957-12-14	NaN	NaN	NaN	18.5556	22.7778	12.7778	NaN	NaN	NaN	NaN	NaN	NaN	NaN	NaN	NaN
1957-12-15	NaN	NaN	NaN	18.3333	23.2778	7.77778	NaN	NaN	NaN	NaN	NaN	NaN	NaN	NaN	NaN
1957-12-16	NaN	NaN	NaN	17.8889	24.3889	5.61111	NaN	NaN	NaN	NaN	NaN	NaN	NaN	NaN	NaN
1957-12-17	NaN	NaN	NaN	17.6667	23.2778	4.38889	NaN	NaN	NaN	NaN	NaN	NaN	NaN	NaN	NaN
1957-12-18	NaN	NaN	NaN	19.1111	25.6111	7.22222	NaN	NaN	NaN	NaN	NaN	NaN	NaN	NaN	NaN
1957-12-19	NaN	NaN	NaN	18.2222	25.6111	4.38889	NaN	NaN	NaN	NaN	NaN	NaN	NaN	NaN	NaN
1957-12-20	NaN	NaN	NaN	18.4444	25.6111	3.88889	NaN	NaN	NaN	NaN	NaN	NaN	NaN	NaN	NaN
1957-12-21	NaN	NaN	NaN	19.5556	25	10	NaN	NaN	NaN	NaN	NaN	NaN	NaN	NaN	NaN
1957-12-22	NaN	NaN	NaN	18.3333	22.7778	14.3889	NaN	NaN	NaN	NaN	NaN	NaN	NaN	NaN	NaN
1957-12-23	NaN	NaN	NaN	17.6667	23.2778	11.7222	NaN	NaN	NaN	NaN	NaN	NaN	NaN	NaN	NaN
1957-12-24	NaN	NaN	NaN	19.6667	26.1111	8.27778	NaN	NaN	NaN	NaN	NaN	NaN	NaN	NaN	NaN
1957-12-25	NaN	NaN	NaN	18	25	5.61111	NaN	NaN	NaN	NaN	NaN	NaN	NaN	NaN	NaN
1957-12-26	NaN	NaN	NaN	18.0556	24.3889	6.11111	NaN	NaN	NaN	NaN	NaN	NaN	NaN	NaN	NaN
1957-12-27	NaN	NaN	NaN	19.3333	25	10.6111	NaN	NaN	NaN	NaN	NaN	NaN	NaN	NaN	NaN
1957-12-28	NaN	NaN	NaN	20.2222	27.7778	11.1111	NaN	NaN	NaN	NaN	NaN	NaN	NaN	NaN	NaN
1957-12-29	NaN	NaN	NaN	19.8889	25.6111	14.3889	NaN	NaN	NaN	NaN	NaN	NaN	NaN	NaN	NaN
1957-12-30	NaN	NaN	NaN	20.2222	25	15.6111	NaN	NaN	NaN	NaN	NaN	NaN	NaN	NaN	NaN
1957-12-31	NaN	NaN	NaN	20.6667	26.1111	13.8889	NaN	NaN	NaN	NaN	NaN	NaN	NaN	NaN	NaN
1958-01-01	NaN	NaN	NaN	19	24.3889	9.38889	NaN	NaN	NaN	NaN	NaN	NaN	NaN	NaN	NaN
1958-01-02	NaN	NaN	NaN	18.8889	26.7222	8.27778	NaN	NaN	NaN	NaN	NaN	NaN	NaN	NaN	NaN
1958-01-03	NaN	NaN	NaN	19.2222	26.7222	6.11111	NaN	NaN	NaN	NaN	NaN	NaN	NaN	NaN	NaN
1958-01-04	NaN	NaN	NaN	19.8889	26.7222	7.22222	NaN	NaN	NaN	NaN	NaN	NaN	NaN	NaN	NaN
1958-01-05	NaN	NaN	NaN	19.2222	25.6111	8.27778	NaN	NaN	NaN	NaN	NaN	NaN	NaN	NaN	NaN
1958-01-06	NaN	NaN	NaN	19.2222	26.7222	6.72222	NaN	NaN	NaN	NaN	NaN	NaN	NaN	NaN	NaN
1958-01-07	NaN	NaN	NaN	18.7778	26.1111	5	NaN	NaN	NaN	NaN	NaN	NaN	NaN	NaN	NaN
1958-01-08	NaN	NaN	NaN	18.3333	27.2222	2.77778	NaN	NaN	NaN	NaN	NaN	NaN	NaN	NaN	NaN
1958-01-09	NaN	NaN	NaN	19	25	7.22222	NaN	NaN	NaN	NaN	NaN	NaN	NaN	NaN	NaN
1958-01-10	NaN	NaN	NaN	19.2222	26.7222	6.11111	NaN	NaN	NaN	NaN	NaN	NaN	NaN	NaN	NaN
1958-01-11	NaN	NaN	NaN	19.3333	25.6111	10	NaN	NaN	NaN	NaN	NaN	NaN	NaN	NaN	NaN
1958-01-12	NaN	NaN	NaN	21	26.7222	13.8889	NaN	NaN	NaN	NaN	NaN	NaN	NaN	NaN	NaN
1958-01-13	NaN	NaN	NaN	21.6667	27.2222	13.8889	NaN	NaN	NaN	NaN	NaN	NaN	NaN	NaN	NaN
1958-01-14	NaN	NaN	NaN	19.5556	26.1111	8.88889	NaN	NaN	NaN	NaN	NaN	NaN	NaN	NaN	NaN
1958-01-15	NaN	NaN	NaN	18.4444	24.3889	7.22222	NaN	NaN	NaN	NaN	NaN	NaN	NaN	NaN	NaN
1958-01-16	NaN	NaN	NaN	17.7222	26.7222	5.61111	NaN	NaN	NaN	NaN	NaN	NaN	NaN	NaN	NaN
1958-01-17	NaN	NaN	NaN	18.8889	25	7.77778	NaN	NaN	NaN	NaN	NaN	NaN	NaN	NaN	NaN
1958-01-18	NaN	NaN	NaN	19.3333	26.7222	6.72222	NaN	NaN	NaN	NaN	NaN	NaN	NaN	NaN	NaN
1958-01-19	NaN	NaN	NaN	19.5556	26.1111	7.22222	NaN	NaN	NaN	NaN	NaN	NaN	NaN	NaN	NaN
1958-01-20	NaN	NaN	NaN	19.4444	25.6111	6.11111	NaN	NaN	NaN	NaN	NaN	NaN	NaN	NaN	NaN
1958-01-21	NaN	NaN	NaN	19.7778	28.8889	8.27778	NaN	NaN	NaN	NaN	NaN	NaN	NaN	NaN	NaN
1958-01-22	NaN	NaN	NaN	21.1111	27.2222	12.2222	NaN	NaN	NaN	NaN	NaN	NaN	NaN	NaN	NaN
1958-01-23	NaN	NaN	NaN	18.8889	27.2222	12.2222	NaN	NaN	NaN	NaN	NaN	NaN	NaN	NaN	NaN
1958-01-24	NaN	NaN	NaN	19.2222	26.1111	13.2778	NaN	NaN	NaN	NaN	NaN	NaN	NaN	NaN	NaN
1958-01-25	NaN	NaN	NaN	18.2222	23.8889	13.2778	NaN	NaN	NaN	NaN	NaN	NaN	NaN	NaN	NaN
1958-01-26	NaN	NaN	NaN	18.7778	24.3889	13.2778	NaN	NaN	NaN	NaN	NaN	NaN	NaN	NaN	NaN
1958-01-27	NaN	NaN	NaN	18.2222	22.7778	14.3889	NaN	NaN	NaN	NaN	NaN	NaN	NaN	NaN	NaN
1958-01-28	NaN	NaN	NaN	18.7778	23.8889	12.2222	NaN	NaN	NaN	NaN	NaN	NaN	NaN	NaN	NaN
1958-01-29	NaN	NaN	NaN	17.8889	23.2778	7.22222	NaN	NaN	NaN	NaN	NaN	NaN	NaN	NaN	NaN
1958-01-30	NaN	NaN	NaN	19.2222	27.2222	9.38889	NaN	NaN	NaN	NaN	NaN	NaN	NaN	NaN	NaN
1958-01-31	NaN	NaN	NaN	20.6667	27.2222	9.38889	NaN	NaN	NaN	NaN	NaN	NaN	NaN	NaN	NaN
1958-02-01	NaN	NaN	NaN	20.7778	26.7222	11.1111	NaN	NaN	NaN	NaN	NaN	NaN	NaN	NaN	NaN
1958-02-02	NaN	NaN	NaN	20.5556	26.7222	10	NaN	NaN	NaN	NaN	NaN	NaN	NaN	NaN	NaN
1958-02-03	NaN	NaN	NaN	20.4444	27.7778	8.27778	NaN	NaN	NaN	NaN	NaN	NaN	NaN	NaN	NaN
1958-02-04	NaN	NaN	NaN	19.6667	28.2778	4.38889	NaN	NaN	NaN	NaN	NaN	NaN	NaN	NaN	NaN
1958-02-05	NaN	NaN	NaN	20.3333	26.7222	7.22222	NaN	NaN	NaN	NaN	NaN	NaN	NaN	NaN	NaN
1958-02-06	NaN	NaN	NaN	19.6667	24.3889	15	NaN	NaN	NaN	NaN	NaN	NaN	NaN	NaN	NaN
1958-02-07	NaN	NaN	NaN	17.1111	20.6111	14.3889	NaN	NaN	NaN	NaN	NaN	NaN	NaN	NaN	NaN
1958-02-08	NaN	NaN	NaN	17.8889	22.7778	12.7778	NaN	NaN	NaN	NaN	NaN	NaN	NaN	NaN	NaN
1958-02-09	NaN	NaN	NaN	18.7778	25	12.2222	NaN	NaN	NaN	NaN	NaN	NaN	NaN	NaN	NaN
1958-02-10	NaN	NaN	NaN	18.7778	23.2778	14.3889	NaN	NaN	NaN	NaN	NaN	NaN	NaN	NaN	NaN
1958-02-11	NaN	NaN	NaN	17.3333	23.2778	13.8889	NaN	NaN	NaN	NaN	NaN	NaN	NaN	NaN	NaN
1958-02-12	NaN	NaN	NaN	17.2222	21.7222	13.2778	NaN	NaN	NaN	NaN	NaN	NaN	NaN	NaN	NaN
1958-02-13	NaN	NaN	NaN	18.2222	22.7778	11.7222	NaN	NaN	NaN	NaN	NaN	NaN	NaN	NaN	NaN
1958-02-14	NaN	NaN	NaN	18.5556	22.7778	12.7778	NaN	NaN	NaN	NaN	NaN	NaN	NaN	NaN	NaN
1958-02-15	NaN	NaN	NaN	18.7778	24.3889	13.8889	NaN	NaN	NaN	NaN	NaN	NaN	NaN	NaN	NaN
1958-02-16	NaN	NaN	NaN	18.6667	23.8889	14.3889	NaN	NaN	NaN	NaN	NaN	NaN	NaN	NaN	NaN
1958-02-17	NaN	NaN	NaN	20	25.6111	12.7778	NaN	NaN	NaN	NaN	NaN	NaN	NaN	NaN	NaN
1958-02-18	NaN	NaN	NaN	21.4444	27.7778	13.8889	NaN	NaN	NaN	NaN	NaN	NaN	NaN	NaN	NaN
1958-02-19	NaN	NaN	NaN	20.4444	27.2222	9.38889	NaN	NaN	NaN	NaN	NaN	NaN	NaN	NaN	NaN
1958-02-20	NaN	NaN	NaN	19.6667	26.7222	8.88889	NaN	NaN	NaN	NaN	NaN	NaN	NaN	NaN	NaN
1958-02-21	NaN	NaN	NaN	19	26.7222	5.61111	NaN	NaN	NaN	NaN	NaN	NaN	NaN	NaN	NaN
1958-02-22	NaN	NaN	NaN	19.2222	27.2222	5	NaN	NaN	NaN	NaN	NaN	NaN	NaN	NaN	NaN
1958-02-23	NaN	NaN	NaN	18.7778	26.7222	5	NaN	NaN	NaN	NaN	NaN	NaN	NaN	NaN	NaN
1958-02-24	NaN	NaN	NaN	19.5556	26.7222	7.77778	NaN	NaN	NaN	NaN	NaN	NaN	NaN	NaN	NaN
1958-02-25	NaN	NaN	NaN	19.4444	26.1111	6.72222	NaN	NaN	NaN	NaN	NaN	NaN	NaN	NaN	NaN
1958-02-26	NaN	NaN	NaN	19.7778	27.2222	7.22222	NaN	NaN	NaN	NaN	NaN	NaN	NaN	NaN	NaN
1958-02-27	NaN	NaN	NaN	20.1111	27.2222	7.77778	NaN	NaN	NaN	NaN	NaN	NaN	NaN	NaN	NaN
1958-02-28	NaN	NaN	NaN	20	27.7778	7.22222	NaN	NaN	NaN	NaN	NaN	NaN	NaN	NaN	NaN
1958-03-01	NaN	NaN	NaN	20.1111	27.7778	7.22222	NaN	NaN	NaN	NaN	NaN	NaN	NaN	NaN	NaN
1958-03-02	NaN	NaN	NaN	18.6667	27.7778	2.77778	NaN	NaN	NaN	NaN	NaN	NaN	NaN	NaN	NaN
1958-03-03	NaN	NaN	NaN	20.5556	28.2778	8.88889	NaN	NaN	NaN	NaN	NaN	NaN	NaN	NaN	NaN
1958-03-04	NaN	NaN	NaN	20.7778	28.8889	6.72222	NaN	NaN	NaN	NaN	NaN	NaN	NaN	NaN	NaN
1958-03-05	NaN	NaN	NaN	20.8889	28.2778	8.27778	NaN	NaN	NaN	NaN	NaN	NaN	NaN	NaN	NaN
1958-03-06	NaN	NaN	NaN	20.1111	27.2222	6.11111	NaN	NaN	NaN	NaN	NaN	NaN	NaN	NaN	NaN
1958-03-07	NaN	NaN	NaN	21	27.7778	9.38889	NaN	NaN	NaN	NaN	NaN	NaN	NaN	NaN	NaN
1958-03-08	NaN	NaN	NaN	20.7778	26.7222	11.1111	NaN	NaN	NaN	NaN	NaN	NaN	NaN	NaN	NaN
1958-03-09	NaN	NaN	NaN	20.6667	27.2222	10.6111	NaN	NaN	NaN	NaN	NaN	NaN	NaN	NaN	NaN
1958-03-10	NaN	NaN	NaN	20.5556	29.3889	5	NaN	NaN	NaN	NaN	NaN	NaN	NaN	NaN	NaN
1958-03-11	NaN	NaN	NaN	22	28.2778	11.1111	NaN	NaN	NaN	NaN	NaN	NaN	NaN	NaN	NaN
1958-03-12	NaN	NaN	NaN	19.5556	30	6.72222	NaN	NaN	NaN	NaN	NaN	NaN	NaN	NaN	NaN
1958-03-13	NaN	NaN	NaN	20.1111	28.8889	7.77778	NaN	NaN	NaN	NaN	NaN	NaN	NaN	NaN	NaN
1958-03-14	NaN	NaN	NaN	20.6667	29.3889	6.72222	NaN	NaN	NaN	NaN	NaN	NaN	NaN	NaN	NaN
1958-03-15	NaN	NaN	NaN	20.3333	26.1111	10.6111	NaN	NaN	NaN	NaN	NaN	NaN	NaN	NaN	NaN
1958-03-16	NaN	NaN	NaN	20	27.2222	11.1111	NaN	NaN	NaN	NaN	NaN	NaN	NaN	NaN	NaN
1958-03-17	NaN	NaN	NaN	18.2222	22.2222	14.3889	NaN	NaN	NaN	NaN	NaN	NaN	NaN	NaN	NaN
1958-03-18	NaN	NaN	NaN	19.6667	23.2778	13.8889	NaN	NaN	NaN	NaN	NaN	NaN	NaN	NaN	NaN
1958-03-19	NaN	NaN	NaN	20.7778	25.6111	14.3889	NaN	NaN	NaN	NaN	NaN	NaN	NaN	NaN	NaN
1958-03-20	NaN	NaN	NaN	22	26.7222	16.7222	NaN	NaN	NaN	NaN	NaN	NaN	NaN	NaN	NaN
1958-03-21	NaN	NaN	NaN	20.8333	27.2222	9.38889	NaN	NaN	NaN	NaN	NaN	NaN	NaN	NaN	NaN
1958-03-22	NaN	NaN	NaN	21.3333	26.7222	12.7778	NaN	NaN	NaN	NaN	NaN	NaN	NaN	NaN	NaN
1958-03-23	NaN	NaN	NaN	20.3333	27.2222	8.88889	NaN	NaN	NaN	NaN	NaN	NaN	NaN	NaN	NaN
1958-03-24	NaN	NaN	NaN	20.1111	28.2778	7.22222	NaN	NaN	NaN	NaN	NaN	NaN	NaN	NaN	NaN
1958-03-25	NaN	NaN	NaN	19.8889	28.2778	4.38889	NaN	NaN	NaN	NaN	NaN	NaN	NaN	NaN	NaN
1958-03-26	NaN	NaN	NaN	21.2222	27.7778	12.2222	NaN	NaN	NaN	NaN	NaN	NaN	NaN	NaN	NaN
1958-03-27	NaN	NaN	NaN	17	23.2778	7.77778	NaN	NaN	NaN	NaN	NaN	NaN	NaN	NaN	NaN
1958-03-28	NaN	NaN	NaN	18.5556	26.1111	7.77778	NaN	NaN	NaN	NaN	NaN	NaN	NaN	NaN	NaN
1958-03-29	NaN	NaN	NaN	20.5556	26.1111	12.2222	NaN	NaN	NaN	NaN	NaN	NaN	NaN	NaN	NaN
1958-03-30	NaN	NaN	NaN	18.2222	25.6111	8.27778	NaN	NaN	NaN	NaN	NaN	NaN	NaN	NaN	NaN
1958-03-31	NaN	NaN	NaN	19	24.3889	6.72222	NaN	NaN	NaN	NaN	NaN	NaN	NaN	NaN	NaN
1958-04-01	NaN	NaN	NaN	18.4444	25.6111	6.72222	NaN	NaN	NaN	NaN	NaN	NaN	NaN	NaN	NaN
1958-04-02	NaN	NaN	NaN	18.2222	23.2778	6.72222	NaN	NaN	NaN	NaN	NaN	NaN	NaN	NaN	NaN
1958-04-03	NaN	NaN	NaN	19.1111	25.6111	8.88889	NaN	NaN	NaN	NaN	NaN	NaN	NaN	NaN	NaN
1958-04-04	NaN	NaN	NaN	19.7778	25.6111	9.38889	NaN	NaN	NaN	NaN	NaN	NaN	NaN	NaN	NaN
1958-04-05	NaN	NaN	NaN	20.3333	27.7778	8.27778	NaN	NaN	NaN	NaN	NaN	NaN	NaN	NaN	NaN
1958-04-06	NaN	NaN	NaN	19.7778	26.7222	7.77778	NaN	NaN	NaN	NaN	NaN	NaN	NaN	NaN	NaN
1958-04-07	NaN	NaN	NaN	17.2222	24.3889	7.77778	NaN	NaN	NaN	NaN	NaN	NaN	NaN	NaN	NaN
1958-04-08	NaN	NaN	NaN	18.4444	23.8889	11.1111	NaN	NaN	NaN	NaN	NaN	NaN	NaN	NaN	NaN
1958-04-09	NaN	NaN	NaN	18.1111	22.7778	11.7222	NaN	NaN	NaN	NaN	NaN	NaN	NaN	NaN	NaN
1958-04-10	NaN	NaN	NaN	18.4444	22.7778	11.1111	NaN	NaN	NaN	NaN	NaN	NaN	NaN	NaN	NaN
1958-04-11	NaN	NaN	NaN	19	26.1111	8.88889	NaN	NaN	NaN	NaN	NaN	NaN	NaN	NaN	NaN
1958-04-12	NaN	NaN	NaN	19.1111	25	8.27778	NaN	NaN	NaN	NaN	NaN	NaN	NaN	NaN	NaN
1958-04-13	NaN	NaN	NaN	20.3333	27.7778	7.22222	NaN	NaN	NaN	NaN	NaN	NaN	NaN	NaN	NaN
1958-04-14	NaN	NaN	NaN	18.7778	25	7.22222	NaN	NaN	NaN	NaN	NaN	NaN	NaN	NaN	NaN
1958-04-15	NaN	NaN	NaN	20.3333	27.2222	10.6111	NaN	NaN	NaN	NaN	NaN	NaN	NaN	NaN	NaN
1958-04-16	NaN	NaN	NaN	18.6667	24.3889	12.7778	NaN	NaN	NaN	NaN	NaN	NaN	NaN	NaN	NaN
1958-04-17	NaN	NaN	NaN	18.3333	22.7778	13.2778	NaN	NaN	NaN	NaN	NaN	NaN	NaN	NaN	NaN
1958-04-18	NaN	NaN	NaN	20.8889	26.7222	15	NaN	NaN	NaN	NaN	NaN	NaN	NaN	NaN	NaN
1958-04-19	NaN	NaN	NaN	18.6667	26.7222	7.22222	NaN	NaN	NaN	NaN	NaN	NaN	NaN	NaN	NaN
1958-04-20	NaN	NaN	NaN	19.8889	26.1111	7.77778	NaN	NaN	NaN	NaN	NaN	NaN	NaN	NaN	NaN
1958-04-21	NaN	NaN	NaN	18.2222	26.1111	11.1111	NaN	NaN	NaN	NaN	NaN	NaN	NaN	NaN	NaN
1958-04-22	NaN	NaN	NaN	19.7778	23.2778	14.3889	NaN	NaN	NaN	NaN	NaN	NaN	NaN	NaN	NaN
1958-04-23	NaN	NaN	NaN	19.2222	26.7222	12.7778	NaN	NaN	NaN	NaN	NaN	NaN	NaN	NaN	NaN
1958-04-24	NaN	NaN	NaN	19.2222	23.8889	15	NaN	NaN	NaN	NaN	NaN	NaN	NaN	NaN	NaN
1958-04-25	NaN	NaN	NaN	19.4444	23.8889	14.3889	NaN	NaN	NaN	NaN	NaN	NaN	NaN	NaN	NaN
1958-04-26	NaN	NaN	NaN	19.7778	26.7222	12.7778	NaN	NaN	NaN	NaN	NaN	NaN	NaN	NaN	NaN
1958-04-27	NaN	NaN	NaN	18	23.2778	15	NaN	NaN	NaN	NaN	NaN	NaN	NaN	NaN	NaN
1958-04-28	NaN	NaN	NaN	18.4444	22.7778	11.1111	NaN	NaN	NaN	NaN	NaN	NaN	NaN	NaN	NaN
1958-04-29	NaN	NaN	NaN	18.1111	23.2778	12.7778	NaN	NaN	NaN	NaN	NaN	NaN	NaN	NaN	NaN
1958-04-30	NaN	NaN	NaN	17.7778	21.1111	14.3889	NaN	NaN	NaN	NaN	NaN	NaN	NaN	NaN	NaN
1958-05-01	NaN	NaN	NaN	17.1111	22.7778	12.7778	NaN	NaN	NaN	NaN	NaN	NaN	NaN	NaN	NaN
1958-05-02	NaN	NaN	NaN	17.6667	21.1111	15	NaN	NaN	NaN	NaN	NaN	NaN	NaN	NaN	NaN
1958-05-03	NaN	NaN	NaN	17.8889	22.7778	12.7778	NaN	NaN	NaN	NaN	NaN	NaN	NaN	NaN	NaN
1958-05-04	NaN	NaN	NaN	18.2222	21.7222	13.8889	NaN	NaN	NaN	NaN	NaN	NaN	NaN	NaN	NaN
1958-05-05	NaN	NaN	NaN	17.8889	25	10.6111	NaN	NaN	NaN	NaN	NaN	NaN	NaN	NaN	NaN
1958-05-06	NaN	NaN	NaN	18	22.7778	11.7222	NaN	NaN	NaN	NaN	NaN	NaN	NaN	NaN	NaN
1958-05-07	NaN	NaN	NaN	19	26.7222	8.27778	NaN	NaN	NaN	NaN	NaN	NaN	NaN	NaN	NaN
1958-05-08	NaN	NaN	NaN	18.7778	25	9.38889	NaN	NaN	NaN	NaN	NaN	NaN	NaN	NaN	NaN
1958-05-09	NaN	NaN	NaN	19.4444	25	14.3889	NaN	NaN	NaN	NaN	NaN	NaN	NaN	NaN	NaN
1958-05-10	NaN	NaN	NaN	18.2222	22.7778	14.3889	NaN	NaN	NaN	NaN	NaN	NaN	NaN	NaN	NaN
1958-05-11	NaN	NaN	NaN	20	23.2778	14.3889	NaN	NaN	NaN	NaN	NaN	NaN	NaN	NaN	NaN
1958-05-12	NaN	NaN	NaN	18.4444	22.2222	14.3889	NaN	NaN	NaN	NaN	NaN	NaN	NaN	NaN	NaN
1958-05-13	NaN	NaN	NaN	18.1111	21.1111	15	NaN	NaN	NaN	NaN	NaN	NaN	NaN	NaN	NaN
1958-05-14	NaN	NaN	NaN	17.4444	21.1111	13.8889	NaN	NaN	NaN	NaN	NaN	NaN	NaN	NaN	NaN
1958-05-15	NaN	NaN	NaN	19.1111	23.8889	13.8889	NaN	NaN	NaN	NaN	NaN	NaN	NaN	NaN	NaN
1958-05-16	NaN	NaN	NaN	19.3333	23.8889	12.7778	NaN	NaN	NaN	NaN	NaN	NaN	NaN	NaN	NaN
1958-05-17	NaN	NaN	NaN	18	23.2778	7.77778	NaN	NaN	NaN	NaN	NaN	NaN	NaN	NaN	NaN
1958-05-18	NaN	NaN	NaN	18.2222	23.8889	8.27778	NaN	NaN	NaN	NaN	NaN	NaN	NaN	NaN	NaN
1958-05-19	NaN	NaN	NaN	18.7778	25	7.77778	NaN	NaN	NaN	NaN	NaN	NaN	NaN	NaN	NaN
1958-05-20	NaN	NaN	NaN	19.2222	24.3889	11.7222	NaN	NaN	NaN	NaN	NaN	NaN	NaN	NaN	NaN
1958-05-21	NaN	NaN	NaN	18.4444	24.3889	12.7778	NaN	NaN	NaN	NaN	NaN	NaN	NaN	NaN	NaN
1958-05-22	NaN	NaN	NaN	17.7778	22.7778	9.38889	NaN	NaN	NaN	NaN	NaN	NaN	NaN	NaN	NaN
1958-05-23	NaN	NaN	NaN	19.3333	23.8889	12.7778	NaN	NaN	NaN	NaN	NaN	NaN	NaN	NaN	NaN
1958-05-24	NaN	NaN	NaN	18.2222	25.6111	7.77778	NaN	NaN	NaN	NaN	NaN	NaN	NaN	NaN	NaN
1958-05-25	NaN	NaN	NaN	17	23.8889	5.61111	NaN	NaN	NaN	NaN	NaN	NaN	NaN	NaN	NaN
1958-05-26	NaN	NaN	NaN	17.4444	24.3889	7.77778	NaN	NaN	NaN	NaN	NaN	NaN	NaN	NaN	NaN
1958-05-27	NaN	NaN	NaN	18.7778	24.3889	10	NaN	NaN	NaN	NaN	NaN	NaN	NaN	NaN	NaN
1958-05-28	NaN	NaN	NaN	18.3333	23.2778	8.88889	NaN	NaN	NaN	NaN	NaN	NaN	NaN	NaN	NaN
1958-05-29	NaN	NaN	NaN	19.3333	24.3889	10.6111	NaN	NaN	NaN	NaN	NaN	NaN	NaN	NaN	NaN
1958-05-30	NaN	NaN	NaN	18.5556	23.2778	7.77778	NaN	NaN	NaN	NaN	NaN	NaN	NaN	NaN	NaN
1958-05-31	NaN	NaN	NaN	19.1111	22.7778	12.2222	NaN	NaN	NaN	NaN	NaN	NaN	NaN	NaN	NaN
1958-06-01	NaN	NaN	NaN	19.2222	23.8889	12.7778	NaN	NaN	NaN	NaN	NaN	NaN	NaN	NaN	NaN
1958-06-02	NaN	NaN	NaN	19.6667	23.8889	12.2222	NaN	NaN	NaN	NaN	NaN	NaN	NaN	NaN	NaN
1958-06-03	NaN	NaN	NaN	17.3333	20.6111	10.6111	NaN	NaN	NaN	NaN	NaN	NaN	NaN	NaN	NaN
1958-06-04	NaN	NaN	NaN	17.2222	21.7222	12.2222	NaN	NaN	NaN	NaN	NaN	NaN	NaN	NaN	NaN
1958-06-05	NaN	NaN	NaN	18.1111	21.1111	12.7778	NaN	NaN	NaN	NaN	NaN	NaN	NaN	NaN	NaN
1958-06-06	NaN	NaN	NaN	18.1111	23.2778	8.88889	NaN	NaN	NaN	NaN	NaN	NaN	NaN	NaN	NaN
1958-06-07	NaN	NaN	NaN	18.6667	22.7778	14.3889	NaN	NaN	NaN	NaN	NaN	NaN	NaN	NaN	NaN
1958-06-08	NaN	NaN	NaN	16.8889	22.2222	10	NaN	NaN	NaN	NaN	NaN	NaN	NaN	NaN	NaN
1958-06-09	NaN	NaN	NaN	16.5556	20.6111	7.77778	NaN	NaN	NaN	NaN	NaN	NaN	NaN	NaN	NaN
1958-06-10	NaN	NaN	NaN	18.1111	25	7.77778	NaN	NaN	NaN	NaN	NaN	NaN	NaN	NaN	NaN
1958-06-11	NaN	NaN	NaN	16.2222	23.2778	5	NaN	NaN	NaN	NaN	NaN	NaN	NaN	NaN	NaN
1958-06-12	NaN	NaN	NaN	16.4444	24.3889	4.38889	NaN	NaN	NaN	NaN	NaN	NaN	NaN	NaN	NaN
1958-06-13	NaN	NaN	NaN	17.2222	23.8889	4.38889	NaN	NaN	NaN	NaN	NaN	NaN	NaN	NaN	NaN
1958-06-14	NaN	NaN	NaN	16.8889	26.7222	5.61111	NaN	NaN	NaN	NaN	NaN	NaN	NaN	NaN	NaN
1958-06-15	NaN	NaN	NaN	18.1111	25	8.88889	NaN	NaN	NaN	NaN	NaN	NaN	NaN	NaN	NaN
1958-06-16	NaN	NaN	NaN	18.5556	25	12.2222	NaN	NaN	NaN	NaN	NaN	NaN	NaN	NaN	NaN
1958-06-17	NaN	NaN	NaN	18.6667	25.6111	11.7222	NaN	NaN	NaN	NaN	NaN	NaN	NaN	NaN	NaN
1958-06-18	NaN	NaN	NaN	18.7778	25.6111	8.88889	NaN	NaN	NaN	NaN	NaN	NaN	NaN	NaN	NaN
1958-06-19	NaN	NaN	NaN	17.3333	22.2222	13.8889	NaN	NaN	NaN	NaN	NaN	NaN	NaN	NaN	NaN
1958-06-20	NaN	NaN	NaN	16.7778	20.6111	10.6111	NaN	NaN	NaN	NaN	NaN	NaN	NaN	NaN	NaN
1958-06-21	NaN	NaN	NaN	17.3333	21.1111	13.8889	NaN	NaN	NaN	NaN	NaN	NaN	NaN	NaN	NaN
1958-06-22	NaN	NaN	NaN	18.2222	22.7778	13.8889	NaN	NaN	NaN	NaN	NaN	NaN	NaN	NaN	NaN
1958-06-23	NaN	NaN	NaN	17.5556	22.2222	13.8889	NaN	NaN	NaN	NaN	NaN	NaN	NaN	NaN	NaN
1958-06-24	NaN	NaN	NaN	16.5556	23.2778	12.2222	NaN	NaN	NaN	NaN	NaN	NaN	NaN	NaN	NaN
1958-06-25	NaN	NaN	NaN	15.8889	19.3889	11.1111	NaN	NaN	NaN	NaN	NaN	NaN	NaN	NaN	NaN
1958-06-26	NaN	NaN	NaN	17.5556	22.7778	11.1111	NaN	NaN	NaN	NaN	NaN	NaN	NaN	NaN	NaN
1958-06-27	NaN	NaN	NaN	16.1111	22.7778	7.22222	NaN	NaN	NaN	NaN	NaN	NaN	NaN	NaN	NaN
1958-06-28	NaN	NaN	NaN	16.1111	22.7778	5	NaN	NaN	NaN	NaN	NaN	NaN	NaN	NaN	NaN
1958-06-29	NaN	NaN	NaN	17.4444	22.2222	9.38889	NaN	NaN	NaN	NaN	NaN	NaN	NaN	NaN	NaN
1958-06-30	NaN	NaN	NaN	17.5556	22.7778	8.27778	NaN	NaN	NaN	NaN	NaN	NaN	NaN	NaN	NaN
1958-07-01	NaN	NaN	NaN	16.7778	20.6111	13.2778	NaN	NaN	NaN	NaN	NaN	NaN	NaN	NaN	NaN
1958-07-02	NaN	NaN	NaN	16.6667	21.7222	13.2778	NaN	NaN	NaN	NaN	NaN	NaN	NaN	NaN	NaN
1958-07-03	NaN	NaN	NaN	15.6667	18.8889	12.7778	NaN	NaN	NaN	NaN	NaN	NaN	NaN	NaN	NaN
1958-07-04	NaN	NaN	NaN	17.4444	21.7222	12.7778	NaN	NaN	NaN	NaN	NaN	NaN	NaN	NaN	NaN
1958-07-05	NaN	NaN	NaN	17.6667	22.7778	13.2778	NaN	NaN	NaN	NaN	NaN	NaN	NaN	NaN	NaN
1958-07-06	NaN	NaN	NaN	16.8889	20	12.7778	NaN	NaN	NaN	NaN	NaN	NaN	NaN	NaN	NaN
1958-07-07	NaN	NaN	NaN	16.4444	23.2778	8.27778	NaN	NaN	NaN	NaN	NaN	NaN	NaN	NaN	NaN
1958-07-08	NaN	NaN	NaN	17.6667	23.8889	7.22222	NaN	NaN	NaN	NaN	NaN	NaN	NaN	NaN	NaN
1958-07-09	NaN	NaN	NaN	17.3333	22.7778	8.27778	NaN	NaN	NaN	NaN	NaN	NaN	NaN	NaN	NaN
1958-07-10	NaN	NaN	NaN	18.6667	24.3889	12.7778	NaN	NaN	NaN	NaN	NaN	NaN	NaN	NaN	NaN
1958-07-11	NaN	NaN	NaN	18.2222	22.7778	13.8889	NaN	NaN	NaN	NaN	NaN	NaN	NaN	NaN	NaN
1958-07-12	NaN	NaN	NaN	17.5556	22.7778	11.1111	NaN	NaN	NaN	NaN	NaN	NaN	NaN	NaN	NaN
1958-07-13	NaN	NaN	NaN	16.4444	21.1111	8.88889	NaN	NaN	NaN	NaN	NaN	NaN	NaN	NaN	NaN
1958-07-14	NaN	NaN	NaN	15.8889	17.7778	13.2778	NaN	NaN	NaN	NaN	NaN	NaN	NaN	NaN	NaN
1958-07-15	NaN	NaN	NaN	16.2222	17.7778	13.8889	NaN	NaN	NaN	NaN	NaN	NaN	NaN	NaN	NaN
1958-07-16	NaN	NaN	NaN	18.5556	23.8889	13.8889	NaN	NaN	NaN	NaN	NaN	NaN	NaN	NaN	NaN
1958-07-17	NaN	NaN	NaN	16.8889	20	13.8889	NaN	NaN	NaN	NaN	NaN	NaN	NaN	NaN	NaN
1958-07-18	NaN	NaN	NaN	17.4444	20.6111	13.8889	NaN	NaN	NaN	NaN	NaN	NaN	NaN	NaN	NaN
1958-07-19	NaN	NaN	NaN	17	22.2222	10.6111	NaN	NaN	NaN	NaN	NaN	NaN	NaN	NaN	NaN
1958-07-20	NaN	NaN	NaN	18.1111	21.1111	13.8889	NaN	NaN	NaN	NaN	NaN	NaN	NaN	NaN	NaN
1958-07-21	NaN	NaN	NaN	18.5556	22.7778	13.8889	NaN	NaN	NaN	NaN	NaN	NaN	NaN	NaN	NaN
1958-07-22	NaN	NaN	NaN	17.3333	23.2778	12.2222	NaN	NaN	NaN	NaN	NaN	NaN	NaN	NaN	NaN
1958-07-23	NaN	NaN	NaN	17.4444	20	13.2778	NaN	NaN	NaN	NaN	NaN	NaN	NaN	NaN	NaN
1958-07-24	NaN	NaN	NaN	18.1111	23.2778	13.8889	NaN	NaN	NaN	NaN	NaN	NaN	NaN	NaN	NaN
1958-07-25	NaN	NaN	NaN	15.7778	19.3889	10.6111	NaN	NaN	NaN	NaN	NaN	NaN	NaN	NaN	NaN
1958-07-26	NaN	NaN	NaN	17.3333	22.7778	12.7778	NaN	NaN	NaN	NaN	NaN	NaN	NaN	NaN	NaN
1958-07-27	NaN	NaN	NaN	16	19.3889	13.2778	NaN	NaN	NaN	NaN	NaN	NaN	NaN	NaN	NaN
1958-07-28	NaN	NaN	NaN	16.6667	21.7222	12.7778	NaN	NaN	NaN	NaN	NaN	NaN	NaN	NaN	NaN
1958-07-29	NaN	NaN	NaN	17.1111	19.3889	12.7778	NaN	NaN	NaN	NaN	NaN	NaN	NaN	NaN	NaN
1958-07-30	NaN	NaN	NaN	15.3333	19.3889	8.27778	NaN	NaN	NaN	NaN	NaN	NaN	NaN	NaN	NaN
1958-07-31	NaN	NaN	NaN	16.4444	21.7222	7.77778	NaN	NaN	NaN	NaN	NaN	NaN	NaN	NaN	NaN
1958-08-01	NaN	NaN	NaN	16.7778	21.1111	7.77778	NaN	NaN	NaN	NaN	NaN	NaN	NaN	NaN	NaN
1958-08-02	NaN	NaN	NaN	16.1111	22.2222	6.11111	NaN	NaN	NaN	NaN	NaN	NaN	NaN	NaN	NaN
1958-08-03	NaN	NaN	NaN	16.5556	23.2778	7.22222	NaN	NaN	NaN	NaN	NaN	NaN	NaN	NaN	NaN
1958-08-04	NaN	NaN	NaN	16	21.7222	10	NaN	NaN	NaN	NaN	NaN	NaN	NaN	NaN	NaN
1958-08-05	NaN	NaN	NaN	15.8889	22.7778	6.11111	NaN	NaN	NaN	NaN	NaN	NaN	NaN	NaN	NaN
1958-08-06	NaN	NaN	NaN	15.4444	21.7222	9.38889	NaN	NaN	NaN	NaN	NaN	NaN	NaN	NaN	NaN
1958-08-07	NaN	NaN	NaN	15.5556	21.7222	8.27778	NaN	NaN	NaN	NaN	NaN	NaN	NaN	NaN	NaN
1958-08-08	NaN	NaN	NaN	16.4444	22.7778	6.11111	NaN	NaN	NaN	NaN	NaN	NaN	NaN	NaN	NaN
1958-08-09	NaN	NaN	NaN	16.4444	20.6111	9.38889	NaN	NaN	NaN	NaN	NaN	NaN	NaN	NaN	NaN
1958-08-10	NaN	NaN	NaN	17	21.7222	10	NaN	NaN	NaN	NaN	NaN	NaN	NaN	NaN	NaN
1958-08-11	NaN	NaN	NaN	17.3333	22.2222	11.7222	NaN	NaN	NaN	NaN	NaN	NaN	NaN	NaN	NaN
1958-08-12	NaN	NaN	NaN	16.3333	20.6111	13.2778	NaN	NaN	NaN	NaN	NaN	NaN	NaN	NaN	NaN
1958-08-13	NaN	NaN	NaN	13.6667	15	11.7222	NaN	NaN	NaN	NaN	NaN	NaN	NaN	NaN	NaN
1958-08-14	NaN	NaN	NaN	17.2222	23.8889	7.77778	NaN	NaN	NaN	NaN	NaN	NaN	NaN	NaN	NaN
1958-08-15	NaN	NaN	NaN	17.7778	24.3889	11.1111	NaN	NaN	NaN	NaN	NaN	NaN	NaN	NaN	NaN
1958-08-16	NaN	NaN	NaN	17.6667	23.8889	12.7778	NaN	NaN	NaN	NaN	NaN	NaN	NaN	NaN	NaN
1958-08-17	NaN	NaN	NaN	17.2222	21.7222	13.2778	NaN	NaN	NaN	NaN	NaN	NaN	NaN	NaN	NaN
1958-08-18	NaN	NaN	NaN	16.3333	20	12.2222	NaN	NaN	NaN	NaN	NaN	NaN	NaN	NaN	NaN
1958-08-19	NaN	NaN	NaN	18.3333	23.2778	9.38889	NaN	NaN	NaN	NaN	NaN	NaN	NaN	NaN	NaN
1958-08-20	NaN	NaN	NaN	18.3333	23.8889	8.88889	NaN	NaN	NaN	NaN	NaN	NaN	NaN	NaN	NaN
1958-08-21	NaN	NaN	NaN	18.7778	23.8889	10.6111	NaN	NaN	NaN	NaN	NaN	NaN	NaN	NaN	NaN
1958-08-22	NaN	NaN	NaN	17.7778	23.2778	7.77778	NaN	NaN	NaN	NaN	NaN	NaN	NaN	NaN	NaN
1958-08-23	NaN	NaN	NaN	17.7778	22.7778	10.6111	NaN	NaN	NaN	NaN	NaN	NaN	NaN	NaN	NaN
1958-08-24	NaN	NaN	NaN	18	22.7778	12.7778	NaN	NaN	NaN	NaN	NaN	NaN	NaN	NaN	NaN
1958-08-25	NaN	NaN	NaN	17.4444	21.1111	12.2222	NaN	NaN	NaN	NaN	NaN	NaN	NaN	NaN	NaN
1958-08-26	NaN	NaN	NaN	17	22.2222	11.1111	NaN	NaN	NaN	NaN	NaN	NaN	NaN	NaN	NaN
1958-08-27	NaN	NaN	NaN	17.5556	25.6111	9.38889	NaN	NaN	NaN	NaN	NaN	NaN	NaN	NaN	NaN
1958-08-28	NaN	NaN	NaN	17.4444	24.3889	7.22222	NaN	NaN	NaN	NaN	NaN	NaN	NaN	NaN	NaN
1958-08-29	NaN	NaN	NaN	17.3333	22.7778	6.72222	NaN	NaN	NaN	NaN	NaN	NaN	NaN	NaN	NaN
1958-08-30	NaN	NaN	NaN	17.2222	23.2778	7.22222	NaN	NaN	NaN	NaN	NaN	NaN	NaN	NaN	NaN
1958-08-31	NaN	NaN	NaN	17.6667	22.7778	9.38889	NaN	NaN	NaN	NaN	NaN	NaN	NaN	NaN	NaN
1958-09-01	NaN	NaN	NaN	17.7778	23.2778	6.72222	NaN	NaN	NaN	NaN	NaN	NaN	NaN	NaN	NaN
1958-09-02	NaN	NaN	NaN	16.7222	24.3889	9.38889	NaN	NaN	NaN	NaN	NaN	NaN	NaN	NaN	NaN
1958-09-03	NaN	NaN	NaN	17.7778	23.2778	10	NaN	NaN	NaN	NaN	NaN	NaN	NaN	NaN	NaN
1958-09-04	NaN	NaN	NaN	18.1111	24.3889	11.7222	NaN	NaN	NaN	NaN	NaN	NaN	NaN	NaN	NaN
1958-09-05	NaN	NaN	NaN	17.8889	25	8.88889	NaN	NaN	NaN	NaN	NaN	NaN	NaN	NaN	NaN
1958-09-06	NaN	NaN	NaN	17.7778	23.2778	7.22222	NaN	NaN	NaN	NaN	NaN	NaN	NaN	NaN	NaN
1958-09-07	NaN	NaN	NaN	17.4444	24.3889	5.61111	NaN	NaN	NaN	NaN	NaN	NaN	NaN	NaN	NaN
1958-09-08	NaN	NaN	NaN	18.3333	24.3889	6.72222	NaN	NaN	NaN	NaN	NaN	NaN	NaN	NaN	NaN
1958-09-09	NaN	NaN	NaN	19	23.2778	10.6111	NaN	NaN	NaN	NaN	NaN	NaN	NaN	NaN	NaN
1958-09-10	NaN	NaN	NaN	19.8889	26.7222	11.7222	NaN	NaN	NaN	NaN	NaN	NaN	NaN	NaN	NaN
1958-09-11	NaN	NaN	NaN	19.2222	24.3889	12.2222	NaN	NaN	NaN	NaN	NaN	NaN	NaN	NaN	NaN
1958-09-12	NaN	NaN	NaN	17.1111	22.7778	9.38889	NaN	NaN	NaN	NaN	NaN	NaN	NaN	NaN	NaN
1958-09-13	NaN	NaN	NaN	19	25	8.88889	NaN	NaN	NaN	NaN	NaN	NaN	NaN	NaN	NaN
1958-09-14	NaN	NaN	NaN	18.2222	22.7778	8.88889	NaN	NaN	NaN	NaN	NaN	NaN	NaN	NaN	NaN
1958-09-15	NaN	NaN	NaN	18.4444	22.7778	10.6111	NaN	NaN	NaN	NaN	NaN	NaN	NaN	NaN	NaN
1958-09-16	NaN	NaN	NaN	17.6667	25	6.11111	NaN	NaN	NaN	NaN	NaN	NaN	NaN	NaN	NaN
1958-09-17	NaN	NaN	NaN	17	25	4.38889	NaN	NaN	NaN	NaN	NaN	NaN	NaN	NaN	NaN
1958-09-18	NaN	NaN	NaN	17.7778	23.2778	5.61111	NaN	NaN	NaN	NaN	NaN	NaN	NaN	NaN	NaN
1958-09-19	NaN	NaN	NaN	17.5556	24.3889	7.22222	NaN	NaN	NaN	NaN	NaN	NaN	NaN	NaN	NaN
1958-09-20	NaN	NaN	NaN	16.2222	23.8889	6.11111	NaN	NaN	NaN	NaN	NaN	NaN	NaN	NaN	NaN
1958-09-21	NaN	NaN	NaN	15	22.7778	5.61111	NaN	NaN	NaN	NaN	NaN	NaN	NaN	NaN	NaN
1958-09-22	NaN	NaN	NaN	17.4444	26.1111	3.27778	NaN	NaN	NaN	NaN	NaN	NaN	NaN	NaN	NaN
1958-09-23	NaN	NaN	NaN	18	26.7222	5.61111	NaN	NaN	NaN	NaN	NaN	NaN	NaN	NaN	NaN
1958-09-24	NaN	NaN	NaN	18.3333	25.6111	5	NaN	NaN	NaN	NaN	NaN	NaN	NaN	NaN	NaN
1958-09-25	NaN	NaN	NaN	17.3333	24.3889	2.77778	NaN	NaN	NaN	NaN	NaN	NaN	NaN	NaN	NaN
1958-09-26	NaN	NaN	NaN	18.6667	23.8889	9.38889	NaN	NaN	NaN	NaN	NaN	NaN	NaN	NaN	NaN
1958-09-27	NaN	NaN	NaN	17.8889	23.8889	4.38889	NaN	NaN	NaN	NaN	NaN	NaN	NaN	NaN	NaN
1958-09-28	NaN	NaN	NaN	16.8889	23.2778	4.38889	NaN	NaN	NaN	NaN	NaN	NaN	NaN	NaN	NaN
1958-09-29	NaN	NaN	NaN	17.8889	23.8889	6.11111	NaN	NaN	NaN	NaN	NaN	NaN	NaN	NaN	NaN
1958-09-30	NaN	NaN	NaN	17.6667	24.3889	4.38889	NaN	NaN	NaN	NaN	NaN	NaN	NaN	NaN	NaN
1958-10-01	NaN	NaN	NaN	16.2222	25	2.77778	NaN	NaN	NaN	NaN	NaN	NaN	NaN	NaN	NaN
1958-10-02	NaN	NaN	NaN	16.6667	24.3889	3.27778	NaN	NaN	NaN	NaN	NaN	NaN	NaN	NaN	NaN
1958-10-03	NaN	NaN	NaN	18.2222	25.6111	6.72222	NaN	NaN	NaN	NaN	NaN	NaN	NaN	NaN	NaN
1958-10-04	NaN	NaN	NaN	16.2222	22.7778	11.7222	NaN	NaN	NaN	NaN	NaN	NaN	NaN	NaN	NaN
1958-10-05	NaN	NaN	NaN	16.2222	21.7222	11.7222	NaN	NaN	NaN	NaN	NaN	NaN	NaN	NaN	NaN
1958-10-06	NaN	NaN	NaN	17.3333	22.2222	10.6111	NaN	NaN	NaN	NaN	NaN	NaN	NaN	NaN	NaN
1958-10-07	NaN	NaN	NaN	17.4444	23.8889	12.2222	NaN	NaN	NaN	NaN	NaN	NaN	NaN	NaN	NaN
1958-10-08	NaN	NaN	NaN	16.1111	23.2778	10	NaN	NaN	NaN	NaN	NaN	NaN	NaN	NaN	NaN
1958-10-09	NaN	NaN	NaN	16.9444	22.7778	12.7778	NaN	NaN	NaN	NaN	NaN	NaN	NaN	NaN	NaN
1958-10-10	NaN	NaN	NaN	17.5556	21.7222	12.7778	NaN	NaN	NaN	NaN	NaN	NaN	NaN	NaN	NaN
1958-10-11	NaN	NaN	NaN	17.5556	21.7222	12.7778	NaN	NaN	NaN	NaN	NaN	NaN	NaN	NaN	NaN
1958-10-12	NaN	NaN	NaN	17.7778	21.7222	11.7222	NaN	NaN	NaN	NaN	NaN	NaN	NaN	NaN	NaN
1958-10-13	NaN	NaN	NaN	16.7778	23.8889	11.1111	NaN	NaN	NaN	NaN	NaN	NaN	NaN	NaN	NaN
1958-10-14	NaN	NaN	NaN	18.2222	22.7778	8.27778	NaN	NaN	NaN	NaN	NaN	NaN	NaN	NaN	NaN
1958-10-15	NaN	NaN	NaN	17.6667	23.8889	5.61111	NaN	NaN	NaN	NaN	NaN	NaN	NaN	NaN	NaN
1958-10-16	NaN	NaN	NaN	18.3333	26.1111	5	NaN	NaN	NaN	NaN	NaN	NaN	NaN	NaN	NaN
1958-10-17	NaN	NaN	NaN	17	23.8889	5	NaN	NaN	NaN	NaN	NaN	NaN	NaN	NaN	NaN
1958-10-18	NaN	NaN	NaN	19.1111	25	7.77778	NaN	NaN	NaN	NaN	NaN	NaN	NaN	NaN	NaN
1958-10-19	NaN	NaN	NaN	18.7778	24.3889	7.77778	NaN	NaN	NaN	NaN	NaN	NaN	NaN	NaN	NaN
1958-10-20	NaN	NaN	NaN	16.1111	23.8889	5	NaN	NaN	NaN	NaN	NaN	NaN	NaN	NaN	NaN
1958-10-21	NaN	NaN	NaN	16.2222	21.7222	9.38889	NaN	NaN	NaN	NaN	NaN	NaN	NaN	NaN	NaN
1958-10-22	NaN	NaN	NaN	16.6667	23.2778	7.22222	NaN	NaN	NaN	NaN	NaN	NaN	NaN	NaN	NaN
1958-10-23	NaN	NaN	NaN	17.1111	23.2778	7.77778	NaN	NaN	NaN	NaN	NaN	NaN	NaN	NaN	NaN
1958-10-24	NaN	NaN	NaN	18.3333	23.2778	8.88889	NaN	NaN	NaN	NaN	NaN	NaN	NaN	NaN	NaN
1958-10-25	NaN	NaN	NaN	17.8889	25	6.11111	NaN	NaN	NaN	NaN	NaN	NaN	NaN	NaN	NaN
1958-10-26	NaN	NaN	NaN	17.7778	24.3889	6.11111	NaN	NaN	NaN	NaN	NaN	NaN	NaN	NaN	NaN
1958-10-27	NaN	NaN	NaN	17.8889	25	7.22222	NaN	NaN	NaN	NaN	NaN	NaN	NaN	NaN	NaN
1958-10-28	NaN	NaN	NaN	17.2222	26.1111	5	NaN	NaN	NaN	NaN	NaN	NaN	NaN	NaN	NaN
1958-10-29	NaN	NaN	NaN	18.2222	26.1111	6.72222	NaN	NaN	NaN	NaN	NaN	NaN	NaN	NaN	NaN
1958-10-30	NaN	NaN	NaN	17.8889	25	5.61111	NaN	NaN	NaN	NaN	NaN	NaN	NaN	NaN	NaN
1958-10-31	NaN	NaN	NaN	18.8889	25	5	NaN	NaN	NaN	NaN	NaN	NaN	NaN	NaN	NaN
1958-11-01	NaN	NaN	NaN	18.6667	25.6111	6.11111	NaN	NaN	NaN	NaN	NaN	NaN	NaN	NaN	NaN
1958-11-02	NaN	NaN	NaN	18.4444	25	6.72222	NaN	NaN	NaN	NaN	NaN	NaN	NaN	NaN	NaN
1958-11-03	NaN	NaN	NaN	18.7778	25	6.72222	NaN	NaN	NaN	NaN	NaN	NaN	NaN	NaN	NaN
1958-11-04	NaN	NaN	NaN	16.1111	23.8889	7.22222	NaN	NaN	NaN	NaN	NaN	NaN	NaN	NaN	NaN
1958-11-05	NaN	NaN	NaN	16.1111	21.1111	6.72222	NaN	NaN	NaN	NaN	NaN	NaN	NaN	NaN	NaN
1958-11-06	NaN	NaN	NaN	15.6667	20.6111	11.7222	NaN	NaN	NaN	NaN	NaN	NaN	NaN	NaN	NaN
1958-11-07	NaN	NaN	NaN	17.3333	25	5.61111	NaN	NaN	NaN	NaN	NaN	NaN	NaN	NaN	NaN
1958-11-08	NaN	NaN	NaN	18	26.1111	5	NaN	NaN	NaN	NaN	NaN	NaN	NaN	NaN	NaN
1958-11-09	NaN	NaN	NaN	17.1111	24.3889	6.11111	NaN	NaN	NaN	NaN	NaN	NaN	NaN	NaN	NaN
1958-11-10	NaN	NaN	NaN	17.2222	21.1111	9.38889	NaN	NaN	NaN	NaN	NaN	NaN	NaN	NaN	NaN
1958-11-11	NaN	NaN	NaN	16.2222	22.7778	8.27778	NaN	NaN	NaN	NaN	NaN	NaN	NaN	NaN	NaN
1958-11-12	NaN	NaN	NaN	17.5	22.7778	10.6111	NaN	NaN	NaN	NaN	NaN	NaN	NaN	NaN	NaN
1958-11-13	NaN	NaN	NaN	15.5556	21.7222	8.27778	NaN	NaN	NaN	NaN	NaN	NaN	NaN	NaN	NaN
1958-11-14	NaN	NaN	NaN	16.3333	22.7778	11.1111	NaN	NaN	NaN	NaN	NaN	NaN	NaN	NaN	NaN
1958-11-15	NaN	NaN	NaN	17.4444	23.2778	7.22222	NaN	NaN	NaN	NaN	NaN	NaN	NaN	NaN	NaN
1958-11-16	NaN	NaN	NaN	16.6667	22.2222	6.11111	NaN	NaN	NaN	NaN	NaN	NaN	NaN	NaN	NaN
1958-11-17	NaN	NaN	NaN	18.3333	23.8889	10.6111	NaN	NaN	NaN	NaN	NaN	NaN	NaN	NaN	NaN
1958-11-18	NaN	NaN	NaN	18.1111	26.1111	6.11111	NaN	NaN	NaN	NaN	NaN	NaN	NaN	NaN	NaN
1958-11-19	NaN	NaN	NaN	18.7778	24.3889	9.38889	NaN	NaN	NaN	NaN	NaN	NaN	NaN	NaN	NaN
1958-11-20	NaN	NaN	NaN	19.3333	25.6111	7.22222	NaN	NaN	NaN	NaN	NaN	NaN	NaN	NaN	NaN
1958-11-21	NaN	NaN	NaN	18.6667	25	5.61111	NaN	NaN	NaN	NaN	NaN	NaN	NaN	NaN	NaN
1958-11-22	NaN	NaN	NaN	17.6667	22.7778	8.88889	NaN	NaN	NaN	NaN	NaN	NaN	NaN	NaN	NaN
1958-11-23	NaN	NaN	NaN	19.7778	26.1111	12.2222	NaN	NaN	NaN	NaN	NaN	NaN	NaN	NaN	NaN
1958-11-24	NaN	NaN	NaN	17.3333	22.2222	7.77778	NaN	NaN	NaN	NaN	NaN	NaN	NaN	NaN	NaN
1958-11-25	NaN	NaN	NaN	17.2778	22.7778	7.77778	NaN	NaN	NaN	NaN	NaN	NaN	NaN	NaN	NaN
1958-11-26	NaN	NaN	NaN	16.5556	23.2778	6.72222	NaN	NaN	NaN	NaN	NaN	NaN	NaN	NaN	NaN
1958-11-27	NaN	NaN	NaN	17.2222	21.7222	7.77778	NaN	NaN	NaN	NaN	NaN	NaN	NaN	NaN	NaN
1958-11-28	NaN	NaN	NaN	19.8889	25	10.6111	NaN	NaN	NaN	NaN	NaN	NaN	NaN	NaN	NaN
1958-11-29	NaN	NaN	NaN	18.4444	24.3889	6.72222	NaN	NaN	NaN	NaN	NaN	NaN	NaN	NaN	NaN
1958-11-30	NaN	NaN	NaN	17.1111	23.2778	5.61111	NaN	NaN	NaN	NaN	NaN	NaN	NaN	NaN	NaN
1958-12-01	NaN	NaN	NaN	17.4444	24.3889	4.38889	NaN	NaN	NaN	NaN	NaN	NaN	NaN	NaN	NaN
1958-12-02	NaN	NaN	NaN	18.6667	25	5.61111	NaN	NaN	NaN	NaN	NaN	NaN	NaN	NaN	NaN
1958-12-03	NaN	NaN	NaN	18.7778	25.6111	6.72222	NaN	NaN	NaN	NaN	NaN	NaN	NaN	NaN	NaN
1958-12-04	NaN	NaN	NaN	18.8889	23.8889	8.88889	NaN	NaN	NaN	NaN	NaN	NaN	NaN	NaN	NaN
1958-12-05	NaN	NaN	NaN	19.4444	24.3889	9.38889	NaN	NaN	NaN	NaN	NaN	NaN	NaN	NaN	NaN
1958-12-06	NaN	NaN	NaN	19.5556	22.7778	14.3889	NaN	NaN	NaN	NaN	NaN	NaN	NaN	NaN	NaN
1958-12-07	NaN	NaN	NaN	17.5556	22.7778	7.77778	NaN	NaN	NaN	NaN	NaN	NaN	NaN	NaN	NaN
1958-12-08	NaN	NaN	NaN	17.8889	22.7778	11.1111	NaN	NaN	NaN	NaN	NaN	NaN	NaN	NaN	NaN
1958-12-09	NaN	NaN	NaN	16.3333	21.7222	6.72222	NaN	NaN	NaN	NaN	NaN	NaN	NaN	NaN	NaN
1958-12-10	NaN	NaN	NaN	16	23.2778	11.1111	NaN	NaN	NaN	NaN	NaN	NaN	NaN	NaN	NaN
1958-12-11	NaN	NaN	NaN	17.4444	23.8889	9.38889	NaN	NaN	NaN	NaN	NaN	NaN	NaN	NaN	NaN
1958-12-12	NaN	NaN	NaN	18.4444	23.2778	11.1111	NaN	NaN	NaN	NaN	NaN	NaN	NaN	NaN	NaN
1958-12-13	NaN	NaN	NaN	19.4444	25.6111	12.2222	NaN	NaN	NaN	NaN	NaN	NaN	NaN	NaN	NaN
1958-12-14	NaN	NaN	NaN	16.3333	22.7778	7.77778	NaN	NaN	NaN	NaN	NaN	NaN	NaN	NaN	NaN
1958-12-15	NaN	NaN	NaN	17.5	23.2778	10.6111	NaN	NaN	NaN	NaN	NaN	NaN	NaN	NaN	NaN
1958-12-16	NaN	NaN	NaN	17.1111	20	13.2778	NaN	NaN	NaN	NaN	NaN	NaN	NaN	NaN	NaN
1958-12-17	NaN	NaN	NaN	16.7778	21.1111	13.8889	NaN	NaN	NaN	NaN	NaN	NaN	NaN	NaN	NaN
1958-12-18	NaN	NaN	NaN	18	22.2222	13.2778	NaN	NaN	NaN	NaN	NaN	NaN	NaN	NaN	NaN
1958-12-19	NaN	NaN	NaN	20.1111	25.6111	12.7778	NaN	NaN	NaN	NaN	NaN	NaN	NaN	NaN	NaN
1958-12-20	NaN	NaN	NaN	18.7222	22.2222	13.2778	NaN	NaN	NaN	NaN	NaN	NaN	NaN	NaN	NaN
1958-12-21	NaN	NaN	NaN	NaN	NaN	NaN	NaN	NaN	NaN	NaN	NaN	NaN	NaN	NaN	NaN
1958-12-22	NaN	NaN	NaN	NaN	NaN	NaN	NaN	NaN	NaN	NaN	NaN	NaN	NaN	NaN	NaN
1958-12-23	NaN	NaN	NaN	19.8889	25.6111	11.7222	NaN	NaN	NaN	NaN	NaN	NaN	NaN	NaN	NaN
1958-12-24	NaN	NaN	NaN	19.4444	26.1111	8.88889	NaN	NaN	NaN	NaN	NaN	NaN	NaN	NaN	NaN
1958-12-25	NaN	NaN	NaN	NaN	NaN	NaN	NaN	NaN	NaN	NaN	NaN	NaN	NaN	NaN	NaN
1958-12-26	NaN	NaN	NaN	NaN	NaN	NaN	NaN	NaN	NaN	NaN	NaN	NaN	NaN	NaN	NaN
1958-12-27	NaN	NaN	NaN	NaN	NaN	NaN	NaN	NaN	NaN	NaN	NaN	NaN	NaN	NaN	NaN
1958-12-28	NaN	NaN	NaN	NaN	NaN	NaN	NaN	NaN	NaN	NaN	NaN	NaN	NaN	NaN	NaN
1958-12-29	NaN	NaN	NaN	NaN	NaN	NaN	NaN	NaN	NaN	NaN	NaN	NaN	NaN	NaN	NaN
1958-12-30	NaN	NaN	NaN	17.2222	23.2778	5.61111	NaN	NaN	NaN	NaN	NaN	NaN	NaN	NaN	NaN
1958-12-31	NaN	NaN	NaN	18.4444	25	5.61111	NaN	NaN	NaN	NaN	NaN	NaN	NaN	NaN	NaN
1959-01-01	NaN	NaN	NaN	18.5556	25.6111	7.22222	NaN	NaN	NaN	NaN	NaN	NaN	NaN	NaN	NaN
1959-01-02	NaN	NaN	NaN	19.8889	26.1111	9.38889	NaN	NaN	NaN	NaN	NaN	NaN	NaN	NaN	NaN
1959-01-03	NaN	NaN	NaN	19.5556	26.7222	6.72222	NaN	NaN	NaN	NaN	NaN	NaN	NaN	NaN	NaN
1959-01-04	NaN	NaN	NaN	18.4444	25	5	NaN	NaN	NaN	NaN	NaN	NaN	NaN	NaN	NaN
1959-01-05	NaN	NaN	NaN	19.1111	25.6111	6.11111	NaN	NaN	NaN	NaN	NaN	NaN	NaN	NaN	NaN
1959-01-06	NaN	NaN	NaN	19	26.7222	6.72222	NaN	NaN	NaN	NaN	NaN	NaN	NaN	NaN	NaN
1959-01-07	NaN	NaN	NaN	20.8333	27.2222	9.38889	NaN	NaN	NaN	NaN	NaN	NaN	NaN	NaN	NaN
1959-01-08	NaN	NaN	NaN	19.3333	23.8889	12.7778	NaN	NaN	NaN	NaN	NaN	NaN	NaN	NaN	NaN
1959-01-09	NaN	NaN	NaN	21.2222	26.1111	12.7778	NaN	NaN	NaN	NaN	NaN	NaN	NaN	NaN	NaN
1959-01-10	NaN	NaN	NaN	20.3333	25	10	NaN	NaN	NaN	NaN	NaN	NaN	NaN	NaN	NaN
1959-01-11	NaN	NaN	NaN	21.1111	27.7778	8.27778	NaN	NaN	NaN	NaN	NaN	NaN	NaN	NaN	NaN
1959-01-12	NaN	NaN	NaN	19.7778	25.6111	7.22222	NaN	NaN	NaN	NaN	NaN	NaN	NaN	NaN	NaN
1959-01-13	NaN	NaN	NaN	19.2222	25.6111	7.22222	NaN	NaN	NaN	NaN	NaN	NaN	NaN	NaN	NaN
1959-01-14	NaN	NaN	NaN	20.7778	27.2222	8.27778	NaN	NaN	NaN	NaN	NaN	NaN	NaN	NaN	NaN
1959-01-15	NaN	NaN	NaN	19.5556	27.2222	6.72222	NaN	NaN	NaN	NaN	NaN	NaN	NaN	NaN	NaN
1959-01-16	NaN	NaN	NaN	18.8889	26.1111	5	NaN	NaN	NaN	NaN	NaN	NaN	NaN	NaN	NaN
1959-01-17	NaN	NaN	NaN	19.1111	25.6111	7.77778	NaN	NaN	NaN	NaN	NaN	NaN	NaN	NaN	NaN
1959-01-18	NaN	NaN	NaN	19	25.6111	6.11111	NaN	NaN	NaN	NaN	NaN	NaN	NaN	NaN	NaN
1959-01-19	NaN	NaN	NaN	18.2222	22.7778	6.11111	NaN	NaN	NaN	NaN	NaN	NaN	NaN	NaN	NaN
1959-01-20	NaN	NaN	NaN	19.7778	27.7778	6.72222	NaN	NaN	NaN	NaN	NaN	NaN	NaN	NaN	NaN
1959-01-21	NaN	NaN	NaN	19.8889	27.2222	7.77778	NaN	NaN	NaN	NaN	NaN	NaN	NaN	NaN	NaN
1959-01-22	NaN	NaN	NaN	19.7778	26.1111	7.77778	NaN	NaN	NaN	NaN	NaN	NaN	NaN	NaN	NaN
1959-01-23	NaN	NaN	NaN	19.2222	26.7222	8.27778	NaN	NaN	NaN	NaN	NaN	NaN	NaN	NaN	NaN
1959-01-24	NaN	NaN	NaN	18	23.2778	8.88889	NaN	NaN	NaN	NaN	NaN	NaN	NaN	NaN	NaN
1959-01-25	NaN	NaN	NaN	19.5556	25.6111	12.7778	NaN	NaN	NaN	NaN	NaN	NaN	NaN	NaN	NaN
1959-01-26	NaN	NaN	NaN	16.5556	21.7222	13.2778	NaN	NaN	NaN	NaN	NaN	NaN	NaN	NaN	NaN
1959-01-27	NaN	NaN	NaN	19.7778	24.3889	13.2778	NaN	NaN	NaN	NaN	NaN	NaN	NaN	NaN	NaN
1959-01-28	NaN	NaN	NaN	19.6667	27.2222	7.77778	NaN	NaN	NaN	NaN	NaN	NaN	NaN	NaN	NaN
1959-01-29	NaN	NaN	NaN	19.1111	27.7778	5.61111	NaN	NaN	NaN	NaN	NaN	NaN	NaN	NaN	NaN
1959-01-30	NaN	NaN	NaN	19.3333	27.7778	7.22222	NaN	NaN	NaN	NaN	NaN	NaN	NaN	NaN	NaN
1959-01-31	NaN	NaN	NaN	18.6667	26.7222	6.72222	NaN	NaN	NaN	NaN	NaN	NaN	NaN	NaN	NaN
1959-02-01	NaN	NaN	NaN	20.4444	27.7778	10.6111	NaN	NaN	NaN	NaN	NaN	NaN	NaN	NaN	NaN
1959-02-02	NaN	NaN	NaN	19.7778	27.7778	6.72222	NaN	NaN	NaN	NaN	NaN	NaN	NaN	NaN	NaN
1959-02-03	NaN	NaN	NaN	19.2222	27.7778	5	NaN	NaN	NaN	NaN	NaN	NaN	NaN	NaN	NaN
1959-02-04	NaN	NaN	NaN	19.5556	27.7778	6.72222	NaN	NaN	NaN	NaN	NaN	NaN	NaN	NaN	NaN
1959-02-05	NaN	NaN	NaN	18.8333	26.1111	4.38889	NaN	NaN	NaN	NaN	NaN	NaN	NaN	NaN	NaN
1959-02-06	NaN	NaN	NaN	19.2222	27.2222	8.27778	NaN	NaN	NaN	NaN	NaN	NaN	NaN	NaN	NaN
1959-02-07	NaN	NaN	NaN	19	26.1111	6.72222	NaN	NaN	NaN	NaN	NaN	NaN	NaN	NaN	NaN
1959-02-08	NaN	NaN	NaN	17.1111	22.7778	8.27778	NaN	NaN	NaN	NaN	NaN	NaN	NaN	NaN	NaN
1959-02-09	NaN	NaN	NaN	18.3333	24.3889	8.88889	NaN	NaN	NaN	NaN	NaN	NaN	NaN	NaN	NaN
1959-02-10	NaN	NaN	NaN	20.6667	27.2222	12.2222	NaN	NaN	NaN	NaN	NaN	NaN	NaN	NaN	NaN
1959-02-11	NaN	NaN	NaN	20.4444	28.2778	6.11111	NaN	NaN	NaN	NaN	NaN	NaN	NaN	NaN	NaN
1959-02-12	NaN	NaN	NaN	20.1111	26.7222	7.22222	NaN	NaN	NaN	NaN	NaN	NaN	NaN	NaN	NaN
1959-02-13	NaN	NaN	NaN	18.6667	26.1111	7.77778	NaN	NaN	NaN	NaN	NaN	NaN	NaN	NaN	NaN
1959-02-14	NaN	NaN	NaN	19.8889	26.1111	11.7222	NaN	NaN	NaN	NaN	NaN	NaN	NaN	NaN	NaN
1959-02-15	NaN	NaN	NaN	20.6667	28.2778	7.77778	NaN	NaN	NaN	NaN	NaN	NaN	NaN	NaN	NaN
1959-02-16	NaN	NaN	NaN	20.1111	27.7778	8.88889	NaN	NaN	NaN	NaN	NaN	NaN	NaN	NaN	NaN
1959-02-17	NaN	NaN	NaN	20.6667	28.2778	7.77778	NaN	NaN	NaN	NaN	NaN	NaN	NaN	NaN	NaN
1959-02-18	NaN	NaN	NaN	19.5556	28.8889	3.88889	NaN	NaN	NaN	NaN	NaN	NaN	NaN	NaN	NaN
1959-02-19	NaN	NaN	NaN	22.2222	28.2778	12.2222	NaN	NaN	NaN	NaN	NaN	NaN	NaN	NaN	NaN
1959-02-20	NaN	NaN	NaN	21.4444	28.2778	10.6111	NaN	NaN	NaN	NaN	NaN	NaN	NaN	NaN	NaN
1959-02-21	NaN	NaN	NaN	21.3333	26.7222	8.27778	NaN	NaN	NaN	NaN	NaN	NaN	NaN	NaN	NaN
1959-02-22	NaN	NaN	NaN	21.1111	26.1111	12.2222	NaN	NaN	NaN	NaN	NaN	NaN	NaN	NaN	NaN
1959-02-23	NaN	NaN	NaN	19.7778	27.2222	5.61111	NaN	NaN	NaN	NaN	NaN	NaN	NaN	NaN	NaN
1959-02-24	NaN	NaN	NaN	19.1111	25.6111	7.77778	NaN	NaN	NaN	NaN	NaN	NaN	NaN	NaN	NaN
1959-02-25	NaN	NaN	NaN	20.6667	28.2778	7.22222	NaN	NaN	NaN	NaN	NaN	NaN	NaN	NaN	NaN
1959-02-26	NaN	NaN	NaN	19.7778	25.6111	10.6111	NaN	NaN	NaN	NaN	NaN	NaN	NaN	NaN	NaN
1959-02-27	NaN	NaN	NaN	17.7778	22.7778	11.7222	NaN	NaN	NaN	NaN	NaN	NaN	NaN	NaN	NaN
1959-02-28	NaN	NaN	NaN	17.4444	23.2778	10.6111	NaN	NaN	NaN	NaN	NaN	NaN	NaN	NaN	NaN
1959-03-01	NaN	NaN	NaN	15.6667	22.2222	9.38889	NaN	NaN	NaN	NaN	NaN	NaN	NaN	NaN	NaN
1959-03-02	NaN	NaN	NaN	16.5556	21.7222	10	NaN	NaN	NaN	NaN	NaN	NaN	NaN	NaN	NaN
1959-03-03	NaN	NaN	NaN	16.3333	21.1111	11.1111	NaN	NaN	NaN	NaN	NaN	NaN	NaN	NaN	NaN
1959-03-04	NaN	NaN	NaN	20.3333	27.2222	9.38889	NaN	NaN	NaN	NaN	NaN	NaN	NaN	NaN	NaN
1959-03-05	NaN	NaN	NaN	23.7778	26.7222	16.7222	NaN	NaN	NaN	NaN	NaN	NaN	NaN	NaN	NaN
1959-03-06	NaN	NaN	NaN	22.2222	27.7778	13.8889	NaN	NaN	NaN	NaN	NaN	NaN	NaN	NaN	NaN
1959-03-07	NaN	NaN	NaN	22.8889	28.8889	15	NaN	NaN	NaN	NaN	NaN	NaN	NaN	NaN	NaN
1959-03-08	NaN	NaN	NaN	20.7778	27.2222	10.6111	NaN	NaN	NaN	NaN	NaN	NaN	NaN	NaN	NaN
1959-03-09	NaN	NaN	NaN	20.7222	25.6111	11.7222	NaN	NaN	NaN	NaN	NaN	NaN	NaN	NaN	NaN
1959-03-10	NaN	NaN	NaN	22.7778	28.2778	17.2222	NaN	NaN	NaN	NaN	NaN	NaN	NaN	NaN	NaN
1959-03-11	NaN	NaN	NaN	20.7778	26.7222	10	NaN	NaN	NaN	NaN	NaN	NaN	NaN	NaN	NaN
1959-03-12	NaN	NaN	NaN	20.5556	26.1111	9.38889	NaN	NaN	NaN	NaN	NaN	NaN	NaN	NaN	NaN
1959-03-13	NaN	NaN	NaN	20.2222	27.7778	6.11111	NaN	NaN	NaN	NaN	NaN	NaN	NaN	NaN	NaN
1959-03-14	NaN	NaN	NaN	22	29.3889	10.6111	NaN	NaN	NaN	NaN	NaN	NaN	NaN	NaN	NaN
1959-03-15	NaN	NaN	NaN	20.7778	29.3889	4.38889	NaN	NaN	NaN	NaN	NaN	NaN	NaN	NaN	NaN
1959-03-16	NaN	NaN	NaN	20.5556	28.2778	5	NaN	NaN	NaN	NaN	NaN	NaN	NaN	NaN	NaN
1959-03-17	NaN	NaN	NaN	21.3333	30	5	NaN	NaN	NaN	NaN	NaN	NaN	NaN	NaN	NaN
1959-03-18	NaN	NaN	NaN	22	30.6111	8.27778	NaN	NaN	NaN	NaN	NaN	NaN	NaN	NaN	NaN
1959-03-19	NaN	NaN	NaN	21.2222	28.2778	9.38889	NaN	NaN	NaN	NaN	NaN	NaN	NaN	NaN	NaN
1959-03-20	NaN	NaN	NaN	22.3333	28.2778	15	NaN	NaN	NaN	NaN	NaN	NaN	NaN	NaN	NaN
1959-03-21	NaN	NaN	NaN	20.1111	27.2222	7.22222	NaN	NaN	NaN	NaN	NaN	NaN	NaN	NaN	NaN
1959-03-22	NaN	NaN	NaN	19.4444	26.7222	12.7778	NaN	NaN	NaN	NaN	NaN	NaN	NaN	NaN	NaN
1959-03-23	NaN	NaN	NaN	19.3333	25	13.2778	NaN	NaN	NaN	NaN	NaN	NaN	NaN	NaN	NaN
1959-03-24	NaN	NaN	NaN	20.5556	25.6111	11.1111	NaN	NaN	NaN	NaN	NaN	NaN	NaN	NaN	NaN
1959-03-25	NaN	NaN	NaN	21.6667	25.6111	14.3889	NaN	NaN	NaN	NaN	NaN	NaN	NaN	NaN	NaN
1959-03-26	NaN	NaN	NaN	18.5556	23.2778	11.7222	NaN	NaN	NaN	NaN	NaN	NaN	NaN	NaN	NaN
1959-03-27	NaN	NaN	NaN	18.0556	24.3889	13.2778	NaN	NaN	NaN	NaN	NaN	NaN	NaN	NaN	NaN
1959-03-28	NaN	NaN	NaN	18.3333	25.6111	12.7778	NaN	NaN	NaN	NaN	NaN	NaN	NaN	NaN	NaN
1959-03-29	NaN	NaN	NaN	19.3333	25.6111	8.88889	NaN	NaN	NaN	NaN	NaN	NaN	NaN	NaN	NaN
1959-03-30	NaN	NaN	NaN	20.5556	25.6111	12.2222	NaN	NaN	NaN	NaN	NaN	NaN	NaN	NaN	NaN
1959-03-31	NaN	NaN	NaN	19.6667	26.1111	8.27778	NaN	NaN	NaN	NaN	NaN	NaN	NaN	NaN	NaN
1959-04-01	NaN	NaN	NaN	17.2222	23.2778	7.22222	NaN	NaN	NaN	NaN	NaN	NaN	NaN	NaN	NaN
1959-04-02	NaN	NaN	NaN	19.1667	26.1111	6.72222	NaN	NaN	NaN	NaN	NaN	NaN	NaN	NaN	NaN
1959-04-03	NaN	NaN	NaN	19.5556	27.2222	7.22222	NaN	NaN	NaN	NaN	NaN	NaN	NaN	NaN	NaN
1959-04-04	NaN	NaN	NaN	18	25.6111	6.11111	NaN	NaN	NaN	NaN	NaN	NaN	NaN	NaN	NaN
1959-04-05	NaN	NaN	NaN	16.1111	23.2778	5.61111	NaN	NaN	NaN	NaN	NaN	NaN	NaN	NaN	NaN
1959-04-06	NaN	NaN	NaN	16.7778	23.2778	6.72222	NaN	NaN	NaN	NaN	NaN	NaN	NaN	NaN	NaN
1959-04-07	NaN	NaN	NaN	18.6667	25.6111	6.72222	NaN	NaN	NaN	NaN	NaN	NaN	NaN	NaN	NaN
1959-04-08	NaN	NaN	NaN	16.3333	22.2222	8.27778	NaN	NaN	NaN	NaN	NaN	NaN	NaN	NaN	NaN
1959-04-09	NaN	NaN	NaN	19	24.3889	11.7222	NaN	NaN	NaN	NaN	NaN	NaN	NaN	NaN	NaN
1959-04-10	NaN	NaN	NaN	18.0556	23.2778	9.38889	NaN	NaN	NaN	NaN	NaN	NaN	NaN	NaN	NaN
1959-04-11	NaN	NaN	NaN	17.6667	24.3889	8.27778	NaN	NaN	NaN	NaN	NaN	NaN	NaN	NaN	NaN
1959-04-12	NaN	NaN	NaN	17.7778	24.3889	11.1111	NaN	NaN	NaN	NaN	NaN	NaN	NaN	NaN	NaN
1959-04-13	NaN	NaN	NaN	17.7778	24.3889	9.38889	NaN	NaN	NaN	NaN	NaN	NaN	NaN	NaN	NaN
1959-04-14	NaN	NaN	NaN	18.1111	24.3889	12.2222	NaN	NaN	NaN	NaN	NaN	NaN	NaN	NaN	NaN
1959-04-15	NaN	NaN	NaN	18.4444	22.7778	10.6111	NaN	NaN	NaN	NaN	NaN	NaN	NaN	NaN	NaN
1959-04-16	NaN	NaN	NaN	16.9444	21.7222	11.7222	NaN	NaN	NaN	NaN	NaN	NaN	NaN	NaN	NaN
1959-04-17	NaN	NaN	NaN	17.4444	21.1111	14.3889	NaN	NaN	NaN	NaN	NaN	NaN	NaN	NaN	NaN
1959-04-18	NaN	NaN	NaN	17.8889	23.2778	12.7778	NaN	NaN	NaN	NaN	NaN	NaN	NaN	NaN	NaN
1959-04-19	NaN	NaN	NaN	17.8889	23.8889	10.6111	NaN	NaN	NaN	NaN	NaN	NaN	NaN	NaN	NaN
1959-04-20	NaN	NaN	NaN	19	22.2222	12.2222	NaN	NaN	NaN	NaN	NaN	NaN	NaN	NaN	NaN
1959-04-21	NaN	NaN	NaN	18.3333	24.3889	10.6111	NaN	NaN	NaN	NaN	NaN	NaN	NaN	NaN	NaN
1959-04-22	NaN	NaN	NaN	17.4444	22.7778	10.6111	NaN	NaN	NaN	NaN	NaN	NaN	NaN	NaN	NaN
1959-04-23	NaN	NaN	NaN	17.3333	23.2778	10	NaN	NaN	NaN	NaN	NaN	NaN	NaN	NaN	NaN
1959-04-24	NaN	NaN	NaN	16.3333	22.7778	9.38889	NaN	NaN	NaN	NaN	NaN	NaN	NaN	NaN	NaN
1959-04-25	NaN	NaN	NaN	18.8889	23.8889	8.88889	NaN	NaN	NaN	NaN	NaN	NaN	NaN	NaN	NaN
1959-04-26	NaN	NaN	NaN	18.4444	25	7.22222	NaN	NaN	NaN	NaN	NaN	NaN	NaN	NaN	NaN
1959-04-27	NaN	NaN	NaN	18.2222	24.3889	13.2778	NaN	NaN	NaN	NaN	NaN	NaN	NaN	NaN	NaN
1959-04-28	NaN	NaN	NaN	19	23.8889	13.2778	NaN	NaN	NaN	NaN	NaN	NaN	NaN	NaN	NaN
1959-04-29	NaN	NaN	NaN	18.7778	22.7778	10	NaN	NaN	NaN	NaN	NaN	NaN	NaN	NaN	NaN
1959-04-30	NaN	NaN	NaN	19	22.7778	12.2222	NaN	NaN	NaN	NaN	NaN	NaN	NaN	NaN	NaN
1959-05-01	NaN	NaN	NaN	17.1667	20.6111	13.8889	NaN	NaN	NaN	NaN	NaN	NaN	NaN	NaN	NaN
1959-05-02	NaN	NaN	NaN	18.5556	25	12.7778	NaN	NaN	NaN	NaN	NaN	NaN	NaN	NaN	NaN
1959-05-03	NaN	NaN	NaN	17.3889	21.1111	15.6111	NaN	NaN	NaN	NaN	NaN	NaN	NaN	NaN	NaN
1959-05-04	NaN	NaN	NaN	17.5556	21.7222	12.7778	NaN	NaN	NaN	NaN	NaN	NaN	NaN	NaN	NaN
1959-05-05	NaN	NaN	NaN	19.1111	26.7222	11.1111	NaN	NaN	NaN	NaN	NaN	NaN	NaN	NaN	NaN
1959-05-06	NaN	NaN	NaN	17.8889	25	7.22222	NaN	NaN	NaN	NaN	NaN	NaN	NaN	NaN	NaN
1959-05-07	NaN	NaN	NaN	18.3333	25	7.77778	NaN	NaN	NaN	NaN	NaN	NaN	NaN	NaN	NaN
1959-05-08	NaN	NaN	NaN	19.3333	23.8889	12.7778	NaN	NaN	NaN	NaN	NaN	NaN	NaN	NaN	NaN
1959-05-09	NaN	NaN	NaN	19.3333	24.3889	13.2778	NaN	NaN	NaN	NaN	NaN	NaN	NaN	NaN	NaN
1959-05-10	NaN	NaN	NaN	18.4444	24.3889	9.38889	NaN	NaN	NaN	NaN	NaN	NaN	NaN	NaN	NaN
1959-05-11	NaN	NaN	NaN	19.7778	23.2778	13.2778	NaN	NaN	NaN	NaN	NaN	NaN	NaN	NaN	NaN
1959-05-12	NaN	NaN	NaN	19	25	8.88889	NaN	NaN	NaN	NaN	NaN	NaN	NaN	NaN	NaN
1959-05-13	NaN	NaN	NaN	18.7778	23.8889	7.77778	NaN	NaN	NaN	NaN	NaN	NaN	NaN	NaN	NaN
1959-05-14	NaN	NaN	NaN	18.6667	23.8889	13.8889	NaN	NaN	NaN	NaN	NaN	NaN	NaN	NaN	NaN
1959-05-15	NaN	NaN	NaN	18.5556	23.8889	12.7778	NaN	NaN	NaN	NaN	NaN	NaN	NaN	NaN	NaN
1959-05-16	NaN	NaN	NaN	17.6667	22.2222	13.2778	NaN	NaN	NaN	NaN	NaN	NaN	NaN	NaN	NaN
1959-05-17	NaN	NaN	NaN	17.2222	22.2222	9.38889	NaN	NaN	NaN	NaN	NaN	NaN	NaN	NaN	NaN
1959-05-18	NaN	NaN	NaN	19.4444	26.1111	9.38889	NaN	NaN	NaN	NaN	NaN	NaN	NaN	NaN	NaN
1959-05-19	NaN	NaN	NaN	18.8333	26.1111	8.27778	NaN	NaN	NaN	NaN	NaN	NaN	NaN	NaN	NaN
1959-05-20	NaN	NaN	NaN	20.1111	25.6111	12.2222	NaN	NaN	NaN	NaN	NaN	NaN	NaN	NaN	NaN
1959-05-21	NaN	NaN	NaN	18.8889	23.2778	15.6111	NaN	NaN	NaN	NaN	NaN	NaN	NaN	NaN	NaN
1959-05-22	NaN	NaN	NaN	19	22.7778	15.6111	NaN	NaN	NaN	NaN	NaN	NaN	NaN	NaN	NaN
1959-05-23	NaN	NaN	NaN	19.7778	24.3889	14.3889	NaN	NaN	NaN	NaN	NaN	NaN	NaN	NaN	NaN
1959-05-24	NaN	NaN	NaN	18.3333	22.2222	14.3889	NaN	NaN	NaN	NaN	NaN	NaN	NaN	NaN	NaN
1959-05-25	NaN	NaN	NaN	18.8889	22.7778	12.7778	NaN	NaN	NaN	NaN	NaN	NaN	NaN	NaN	NaN
1959-05-26	NaN	NaN	NaN	18.6667	26.1111	13.2778	NaN	NaN	NaN	NaN	NaN	NaN	NaN	NaN	NaN
1959-05-27	NaN	NaN	NaN	19.8889	25	12.7778	NaN	NaN	NaN	NaN	NaN	NaN	NaN	NaN	NaN
1959-05-28	NaN	NaN	NaN	19.8889	25.6111	12.2222	NaN	NaN	NaN	NaN	NaN	NaN	NaN	NaN	NaN
1959-05-29	NaN	NaN	NaN	18.4444	23.2778	11.7222	NaN	NaN	NaN	NaN	NaN	NaN	NaN	NaN	NaN
1959-05-30	NaN	NaN	NaN	18.2222	22.7778	12.2222	NaN	NaN	NaN	NaN	NaN	NaN	NaN	NaN	NaN
1959-05-31	NaN	NaN	NaN	18.6667	26.1111	13.8889	NaN	NaN	NaN	NaN	NaN	NaN	NaN	NaN	NaN
1959-06-01	NaN	NaN	NaN	17.4444	23.2778	11.7222	NaN	NaN	NaN	NaN	NaN	NaN	NaN	NaN	NaN
1959-06-02	NaN	NaN	NaN	17.6667	23.8889	11.7222	NaN	NaN	NaN	NaN	NaN	NaN	NaN	NaN	NaN
1959-06-03	NaN	NaN	NaN	17.4444	23.2778	11.1111	NaN	NaN	NaN	NaN	NaN	NaN	NaN	NaN	NaN
1959-06-04	NaN	NaN	NaN	17.1111	24.3889	7.77778	NaN	NaN	NaN	NaN	NaN	NaN	NaN	NaN	NaN
1959-06-05	NaN	NaN	NaN	16.4444	21.7222	8.27778	NaN	NaN	NaN	NaN	NaN	NaN	NaN	NaN	NaN
1959-06-06	NaN	NaN	NaN	17.3333	23.8889	8.27778	NaN	NaN	NaN	NaN	NaN	NaN	NaN	NaN	NaN
1959-06-07	NaN	NaN	NaN	17	23.2778	7.77778	NaN	NaN	NaN	NaN	NaN	NaN	NaN	NaN	NaN
1959-06-08	NaN	NaN	NaN	17.2222	25	5	NaN	NaN	NaN	NaN	NaN	NaN	NaN	NaN	NaN
1959-06-09	NaN	NaN	NaN	18	25.6111	5.61111	NaN	NaN	NaN	NaN	NaN	NaN	NaN	NaN	NaN
1959-06-10	NaN	NaN	NaN	18.5556	26.1111	6.72222	NaN	NaN	NaN	NaN	NaN	NaN	NaN	NaN	NaN
1959-06-11	NaN	NaN	NaN	17.5556	23.8889	7.22222	NaN	NaN	NaN	NaN	NaN	NaN	NaN	NaN	NaN
1959-06-12	NaN	NaN	NaN	17.4444	22.7778	6.11111	NaN	NaN	NaN	NaN	NaN	NaN	NaN	NaN	NaN
1959-06-13	NaN	NaN	NaN	16.7778	22.2222	5	NaN	NaN	NaN	NaN	NaN	NaN	NaN	NaN	NaN
1959-06-14	NaN	NaN	NaN	16.6667	23.2778	4.38889	NaN	NaN	NaN	NaN	NaN	NaN	NaN	NaN	NaN
1959-06-15	NaN	NaN	NaN	16.6667	24.3889	4.38889	NaN	NaN	NaN	NaN	NaN	NaN	NaN	NaN	NaN
1959-06-16	NaN	NaN	NaN	16.5556	22.7778	5.61111	NaN	NaN	NaN	NaN	NaN	NaN	NaN	NaN	NaN
1959-06-17	NaN	NaN	NaN	17.1667	23.8889	5.61111	NaN	NaN	NaN	NaN	NaN	NaN	NaN	NaN	NaN
1959-06-18	NaN	NaN	NaN	16.1111	23.8889	5	NaN	NaN	NaN	NaN	NaN	NaN	NaN	NaN	NaN
1959-06-19	NaN	NaN	NaN	16.2222	23.2778	4.38889	NaN	NaN	NaN	NaN	NaN	NaN	NaN	NaN	NaN
1959-06-20	NaN	NaN	NaN	16.8889	22.7778	5	NaN	NaN	NaN	NaN	NaN	NaN	NaN	NaN	NaN
1959-06-21	NaN	NaN	NaN	16.7778	22.7778	5	NaN	NaN	NaN	NaN	NaN	NaN	NaN	NaN	NaN
1959-06-22	NaN	NaN	NaN	18	25.6111	5	NaN	NaN	NaN	NaN	NaN	NaN	NaN	NaN	NaN
1959-06-23	NaN	NaN	NaN	17.2222	24.3889	5.61111	NaN	NaN	NaN	NaN	NaN	NaN	NaN	NaN	NaN
1959-06-24	NaN	NaN	NaN	18.6667	24.3889	10.6111	NaN	NaN	NaN	NaN	NaN	NaN	NaN	NaN	NaN
1959-06-25	NaN	NaN	NaN	17.7778	24.3889	13.2778	NaN	NaN	NaN	NaN	NaN	NaN	NaN	NaN	NaN
1959-06-26	NaN	NaN	NaN	17.3333	25	7.77778	NaN	NaN	NaN	NaN	NaN	NaN	NaN	NaN	NaN
1959-06-27	NaN	NaN	NaN	16.5556	22.7778	7.22222	NaN	NaN	NaN	NaN	NaN	NaN	NaN	NaN	NaN
1959-06-28	NaN	NaN	NaN	17.5556	22.2222	11.1111	NaN	NaN	NaN	NaN	NaN	NaN	NaN	NaN	NaN
1959-06-29	NaN	NaN	NaN	17.3333	22.2222	13.8889	NaN	NaN	NaN	NaN	NaN	NaN	NaN	NaN	NaN
1959-06-30	NaN	NaN	NaN	18.1111	23.2778	8.27778	NaN	NaN	NaN	NaN	NaN	NaN	NaN	NaN	NaN
1959-07-01	NaN	NaN	NaN	17	20.6111	10.6111	NaN	NaN	NaN	NaN	NaN	NaN	NaN	NaN	NaN
1959-07-02	NaN	NaN	NaN	17.7778	22.2222	12.7778	NaN	NaN	NaN	NaN	NaN	NaN	NaN	NaN	NaN
1959-07-03	NaN	NaN	NaN	16.5556	18.8889	13.2778	NaN	NaN	NaN	NaN	NaN	NaN	NaN	NaN	NaN
1959-07-04	NaN	NaN	NaN	16.6667	19.3889	12.7778	NaN	NaN	NaN	NaN	NaN	NaN	NaN	NaN	NaN
1959-07-05	NaN	NaN	NaN	16.6667	21.1111	13.2778	NaN	NaN	NaN	NaN	NaN	NaN	NaN	NaN	NaN
1959-07-06	NaN	NaN	NaN	16.2222	21.1111	5	NaN	NaN	NaN	NaN	NaN	NaN	NaN	NaN	NaN
1959-07-07	NaN	NaN	NaN	17.1111	23.8889	5	NaN	NaN	NaN	NaN	NaN	NaN	NaN	NaN	NaN
1959-07-08	NaN	NaN	NaN	16.5556	23.8889	3.27778	NaN	NaN	NaN	NaN	NaN	NaN	NaN	NaN	NaN
1959-07-09	NaN	NaN	NaN	16.6667	23.2778	2.22222	NaN	NaN	NaN	NaN	NaN	NaN	NaN	NaN	NaN
1959-07-10	NaN	NaN	NaN	16.3333	23.2778	2.22222	NaN	NaN	NaN	NaN	NaN	NaN	NaN	NaN	NaN
1959-07-11	NaN	NaN	NaN	17.3333	23.2778	5.61111	NaN	NaN	NaN	NaN	NaN	NaN	NaN	NaN	NaN
1959-07-12	NaN	NaN	NaN	18.2222	25	6.72222	NaN	NaN	NaN	NaN	NaN	NaN	NaN	NaN	NaN
1959-07-13	NaN	NaN	NaN	17.4444	25.6111	3.88889	NaN	NaN	NaN	NaN	NaN	NaN	NaN	NaN	NaN
1959-07-14	NaN	NaN	NaN	16.5556	25	3.88889	NaN	NaN	NaN	NaN	NaN	NaN	NaN	NaN	NaN
1959-07-15	NaN	NaN	NaN	16.6667	25.6111	4.38889	NaN	NaN	NaN	NaN	NaN	NaN	NaN	NaN	NaN
1959-07-16	NaN	NaN	NaN	17.7222	22.7778	10.6111	NaN	NaN	NaN	NaN	NaN	NaN	NaN	NaN	NaN
1959-07-17	NaN	NaN	NaN	17.8889	22.2222	12.2222	NaN	NaN	NaN	NaN	NaN	NaN	NaN	NaN	NaN
1959-07-18	NaN	NaN	NaN	18	24.3889	11.7222	NaN	NaN	NaN	NaN	NaN	NaN	NaN	NaN	NaN
1959-07-19	NaN	NaN	NaN	17.7778	22.7778	11.7222	NaN	NaN	NaN	NaN	NaN	NaN	NaN	NaN	NaN
1959-07-20	NaN	NaN	NaN	16.4444	22.2222	12.2222	NaN	NaN	NaN	NaN	NaN	NaN	NaN	NaN	NaN
1959-07-21	NaN	NaN	NaN	17.6667	23.2778	7.77778	NaN	NaN	NaN	NaN	NaN	NaN	NaN	NaN	NaN
1959-07-22	NaN	NaN	NaN	18.7778	24.3889	14.3889	NaN	NaN	NaN	NaN	NaN	NaN	NaN	NaN	NaN
1959-07-23	NaN	NaN	NaN	19.6667	24.3889	13.2778	NaN	NaN	NaN	NaN	NaN	NaN	NaN	NaN	NaN
1959-07-24	NaN	NaN	NaN	17.3333	22.2222	13.2778	NaN	NaN	NaN	NaN	NaN	NaN	NaN	NaN	NaN
1959-07-25	NaN	NaN	NaN	18.6667	24.3889	12.7778	NaN	NaN	NaN	NaN	NaN	NaN	NaN	NaN	NaN
1959-07-26	NaN	NaN	NaN	16.6667	21.1111	13.8889	NaN	NaN	NaN	NaN	NaN	NaN	NaN	NaN	NaN
1959-07-27	NaN	NaN	NaN	16.4444	21.7222	13.2778	NaN	NaN	NaN	NaN	NaN	NaN	NaN	NaN	NaN
1959-07-28	NaN	NaN	NaN	16.3333	20	12.7778	NaN	NaN	NaN	NaN	NaN	NaN	NaN	NaN	NaN
1959-07-29	NaN	NaN	NaN	16.6667	21.1111	8.27778	NaN	NaN	NaN	NaN	NaN	NaN	NaN	NaN	NaN
1959-07-30	NaN	NaN	NaN	16.0556	21.1111	8.27778	NaN	NaN	NaN	NaN	NaN	NaN	NaN	NaN	NaN
1959-07-31	NaN	NaN	NaN	17.5556	22.2222	10.6111	NaN	NaN	NaN	NaN	NaN	NaN	NaN	NaN	NaN
1959-08-01	NaN	NaN	NaN	17.4444	22.2222	12.2222	NaN	NaN	NaN	NaN	NaN	NaN	NaN	NaN	NaN
1959-08-02	NaN	NaN	NaN	17.2222	24.3889	7.22222	NaN	NaN	NaN	NaN	NaN	NaN	NaN	NaN	NaN
1959-08-03	NaN	NaN	NaN	17.1111	22.2222	7.22222	NaN	NaN	NaN	NaN	NaN	NaN	NaN	NaN	NaN
1959-08-04	NaN	NaN	NaN	17.4444	21.7222	10.6111	NaN	NaN	NaN	NaN	NaN	NaN	NaN	NaN	NaN
1959-08-05	NaN	NaN	NaN	17.5556	22.2222	12.7778	NaN	NaN	NaN	NaN	NaN	NaN	NaN	NaN	NaN
1959-08-06	NaN	NaN	NaN	18.5556	23.8889	11.7222	NaN	NaN	NaN	NaN	NaN	NaN	NaN	NaN	NaN
1959-08-07	NaN	NaN	NaN	17.7778	22.7778	11.1111	NaN	NaN	NaN	NaN	NaN	NaN	NaN	NaN	NaN
1959-08-08	NaN	NaN	NaN	16.3333	22.7778	7.77778	NaN	NaN	NaN	NaN	NaN	NaN	NaN	NaN	NaN
1959-08-09	NaN	NaN	NaN	17.7778	23.8889	7.77778	NaN	NaN	NaN	NaN	NaN	NaN	NaN	NaN	NaN
1959-08-10	NaN	NaN	NaN	16.7778	22.7778	6.72222	NaN	NaN	NaN	NaN	NaN	NaN	NaN	NaN	NaN
1959-08-11	NaN	NaN	NaN	17.1111	23.2778	6.72222	NaN	NaN	NaN	NaN	NaN	NaN	NaN	NaN	NaN
1959-08-12	NaN	NaN	NaN	18.3333	23.8889	11.1111	NaN	NaN	NaN	NaN	NaN	NaN	NaN	NaN	NaN
1959-08-13	NaN	NaN	NaN	17.6667	23.8889	11.7222	NaN	NaN	NaN	NaN	NaN	NaN	NaN	NaN	NaN
1959-08-14	NaN	NaN	NaN	18	23.2778	10.6111	NaN	NaN	NaN	NaN	NaN	NaN	NaN	NaN	NaN
1959-08-15	NaN	NaN	NaN	17	21.1111	13.8889	NaN	NaN	NaN	NaN	NaN	NaN	NaN	NaN	NaN
1959-08-16	NaN	NaN	NaN	18.5556	23.8889	12.7778	NaN	NaN	NaN	NaN	NaN	NaN	NaN	NaN	NaN
1959-08-17	NaN	NaN	NaN	18.3333	23.2778	12.2222	NaN	NaN	NaN	NaN	NaN	NaN	NaN	NaN	NaN
1959-08-18	NaN	NaN	NaN	16.4444	22.2222	8.88889	NaN	NaN	NaN	NaN	NaN	NaN	NaN	NaN	NaN
1959-08-19	NaN	NaN	NaN	17.8889	21.7222	13.2778	NaN	NaN	NaN	NaN	NaN	NaN	NaN	NaN	NaN
1959-08-20	NaN	NaN	NaN	18.3333	23.8889	10.6111	NaN	NaN	NaN	NaN	NaN	NaN	NaN	NaN	NaN
1959-08-21	NaN	NaN	NaN	17.7778	23.8889	6.11111	NaN	NaN	NaN	NaN	NaN	NaN	NaN	NaN	NaN
1959-08-22	NaN	NaN	NaN	17.6667	22.7778	10	NaN	NaN	NaN	NaN	NaN	NaN	NaN	NaN	NaN
1959-08-23	NaN	NaN	NaN	17.2222	22.2222	8.27778	NaN	NaN	NaN	NaN	NaN	NaN	NaN	NaN	NaN
1959-08-24	NaN	NaN	NaN	16.2222	21.7222	3.27778	NaN	NaN	NaN	NaN	NaN	NaN	NaN	NaN	NaN
1959-08-25	NaN	NaN	NaN	16.7778	23.2778	9.38889	NaN	NaN	NaN	NaN	NaN	NaN	NaN	NaN	NaN
1959-08-26	NaN	NaN	NaN	15.4444	21.7222	9.38889	NaN	NaN	NaN	NaN	NaN	NaN	NaN	NaN	NaN
1959-08-27	NaN	NaN	NaN	18	22.7778	13.2778	NaN	NaN	NaN	NaN	NaN	NaN	NaN	NaN	NaN
1959-08-28	NaN	NaN	NaN	18.1111	22.2222	12.2222	NaN	NaN	NaN	NaN	NaN	NaN	NaN	NaN	NaN
1959-08-29	NaN	NaN	NaN	16.1667	21.7222	7.77778	NaN	NaN	NaN	NaN	NaN	NaN	NaN	NaN	NaN
1959-08-30	NaN	NaN	NaN	16.6667	22.2222	8.27778	NaN	NaN	NaN	NaN	NaN	NaN	NaN	NaN	NaN
1959-08-31	NaN	NaN	NaN	17.8889	24.3889	7.22222	NaN	NaN	NaN	NaN	NaN	NaN	NaN	NaN	NaN
1959-09-01	NaN	NaN	NaN	15.7778	22.2222	6.11111	NaN	NaN	NaN	NaN	NaN	NaN	NaN	NaN	NaN
1959-09-02	NaN	NaN	NaN	18.7778	23.2778	12.2222	NaN	NaN	NaN	NaN	NaN	NaN	NaN	NaN	NaN
1959-09-03	NaN	NaN	NaN	17.8889	22.7778	13.8889	NaN	NaN	NaN	NaN	NaN	NaN	NaN	NaN	NaN
1959-09-04	NaN	NaN	NaN	17.6667	24.3889	10	NaN	NaN	NaN	NaN	NaN	NaN	NaN	NaN	NaN
1959-09-05	NaN	NaN	NaN	15.7778	21.1111	8.88889	NaN	NaN	NaN	NaN	NaN	NaN	NaN	NaN	NaN
1959-09-06	NaN	NaN	NaN	18.3333	24.3889	11.1111	NaN	NaN	NaN	NaN	NaN	NaN	NaN	NaN	NaN
1959-09-07	NaN	NaN	NaN	17.2222	22.7778	7.77778	NaN	NaN	NaN	NaN	NaN	NaN	NaN	NaN	NaN
1959-09-08	NaN	NaN	NaN	18.1111	23.8889	10	NaN	NaN	NaN	NaN	NaN	NaN	NaN	NaN	NaN
1959-09-09	NaN	NaN	NaN	16.6667	23.2778	12.7778	NaN	NaN	NaN	NaN	NaN	NaN	NaN	NaN	NaN
1959-09-10	NaN	NaN	NaN	15.5556	22.7778	7.77778	NaN	NaN	NaN	NaN	NaN	NaN	NaN	NaN	NaN
1959-09-11	NaN	NaN	NaN	16.6667	22.2222	7.22222	NaN	NaN	NaN	NaN	NaN	NaN	NaN	NaN	NaN
1959-09-12	NaN	NaN	NaN	18.2222	23.2778	8.27778	NaN	NaN	NaN	NaN	NaN	NaN	NaN	NaN	NaN
1959-09-13	NaN	NaN	NaN	17.8889	25	6.11111	NaN	NaN	NaN	NaN	NaN	NaN	NaN	NaN	NaN
1959-09-14	NaN	NaN	NaN	18.1111	23.8889	7.22222	NaN	NaN	NaN	NaN	NaN	NaN	NaN	NaN	NaN
1959-09-15	NaN	NaN	NaN	16.5556	23.2778	7.77778	NaN	NaN	NaN	NaN	NaN	NaN	NaN	NaN	NaN
1959-09-16	NaN	NaN	NaN	18.6667	22.7778	13.2778	NaN	NaN	NaN	NaN	NaN	NaN	NaN	NaN	NaN
1959-09-17	NaN	NaN	NaN	17.6667	23.8889	5.61111	NaN	NaN	NaN	NaN	NaN	NaN	NaN	NaN	NaN
1959-09-18	NaN	NaN	NaN	16.4444	22.2222	5.61111	NaN	NaN	NaN	NaN	NaN	NaN	NaN	NaN	NaN
1959-09-19	NaN	NaN	NaN	17.2222	25.6111	3.27778	NaN	NaN	NaN	NaN	NaN	NaN	NaN	NaN	NaN
1959-09-20	NaN	NaN	NaN	17.4444	25	5	NaN	NaN	NaN	NaN	NaN	NaN	NaN	NaN	NaN
1959-09-21	NaN	NaN	NaN	17.6667	23.2778	5.61111	NaN	NaN	NaN	NaN	NaN	NaN	NaN	NaN	NaN
1959-09-22	NaN	NaN	NaN	19.2222	27.2222	5	NaN	NaN	NaN	NaN	NaN	NaN	NaN	NaN	NaN
1959-09-23	NaN	NaN	NaN	18.7778	27.2222	5	NaN	NaN	NaN	NaN	NaN	NaN	NaN	NaN	NaN
1959-09-24	NaN	NaN	NaN	17.4444	23.2778	5	NaN	NaN	NaN	NaN	NaN	NaN	NaN	NaN	NaN
1959-09-25	NaN	NaN	NaN	17.7778	23.2778	3.88889	NaN	NaN	NaN	NaN	NaN	NaN	NaN	NaN	NaN
1959-09-26	NaN	NaN	NaN	17.1111	24.3889	4.38889	NaN	NaN	NaN	NaN	NaN	NaN	NaN	NaN	NaN
1959-09-27	NaN	NaN	NaN	17.2222	23.8889	5.61111	NaN	NaN	NaN	NaN	NaN	NaN	NaN	NaN	NaN
1959-09-28	NaN	NaN	NaN	17.4444	23.2778	6.72222	NaN	NaN	NaN	NaN	NaN	NaN	NaN	NaN	NaN
1959-09-29	NaN	NaN	NaN	19.8889	25.6111	10.6111	NaN	NaN	NaN	NaN	NaN	NaN	NaN	NaN	NaN
1959-09-30	NaN	NaN	NaN	20.2222	26.1111	12.7778	NaN	NaN	NaN	NaN	NaN	NaN	NaN	NaN	NaN
1959-10-01	NaN	NaN	NaN	17.7778	24.3889	8.88889	NaN	NaN	NaN	NaN	NaN	NaN	NaN	NaN	NaN
1959-10-02	NaN	NaN	NaN	17.4444	23.8889	13.2778	NaN	NaN	NaN	NaN	NaN	NaN	NaN	NaN	NaN
1959-10-03	NaN	NaN	NaN	19.4444	25	12.2222	NaN	NaN	NaN	NaN	NaN	NaN	NaN	NaN	NaN
1959-10-04	NaN	NaN	NaN	19	23.8889	12.7778	NaN	NaN	NaN	NaN	NaN	NaN	NaN	NaN	NaN
1959-10-05	NaN	NaN	NaN	17.7778	25	12.7778	NaN	NaN	NaN	NaN	NaN	NaN	NaN	NaN	NaN
1959-10-06	NaN	NaN	NaN	18.3333	24.3889	11.1111	NaN	NaN	NaN	NaN	NaN	NaN	NaN	NaN	NaN
1959-10-07	NaN	NaN	NaN	17.3333	23.2778	7.77778	NaN	NaN	NaN	NaN	NaN	NaN	NaN	NaN	NaN
1959-10-08	NaN	NaN	NaN	18.7778	23.2778	13.2778	NaN	NaN	NaN	NaN	NaN	NaN	NaN	NaN	NaN
1959-10-09	NaN	NaN	NaN	18.4444	24.3889	6.11111	NaN	NaN	NaN	NaN	NaN	NaN	NaN	NaN	NaN
1959-10-10	NaN	NaN	NaN	19.3333	23.2778	11.7222	NaN	NaN	NaN	NaN	NaN	NaN	NaN	NaN	NaN
1959-10-11	NaN	NaN	NaN	16.2222	22.7778	6.72222	NaN	NaN	NaN	NaN	NaN	NaN	NaN	NaN	NaN
1959-10-12	NaN	NaN	NaN	17.7778	23.8889	5.61111	NaN	NaN	NaN	NaN	NaN	NaN	NaN	NaN	NaN
1959-10-13	NaN	NaN	NaN	17.8889	26.7222	4.38889	NaN	NaN	NaN	NaN	NaN	NaN	NaN	NaN	NaN
1959-10-14	NaN	NaN	NaN	17.6667	25.6111	5	NaN	NaN	NaN	NaN	NaN	NaN	NaN	NaN	NaN
1959-10-15	NaN	NaN	NaN	19.1111	25.6111	3.27778	NaN	NaN	NaN	NaN	NaN	NaN	NaN	NaN	NaN
1959-10-16	NaN	NaN	NaN	18.4444	25	3.27778	NaN	NaN	NaN	NaN	NaN	NaN	NaN	NaN	NaN
1959-10-17	NaN	NaN	NaN	19.1111	26.7222	3.88889	NaN	NaN	NaN	NaN	NaN	NaN	NaN	NaN	NaN
1959-10-18	NaN	NaN	NaN	19.5556	27.2222	7.22222	NaN	NaN	NaN	NaN	NaN	NaN	NaN	NaN	NaN
1959-10-19	NaN	NaN	NaN	17.2222	25.6111	7.77778	NaN	NaN	NaN	NaN	NaN	NaN	NaN	NaN	NaN
1959-10-20	NaN	NaN	NaN	20.4444	26.7222	8.27778	NaN	NaN	NaN	NaN	NaN	NaN	NaN	NaN	NaN
1959-10-21	NaN	NaN	NaN	19.3333	25.6111	8.27778	NaN	NaN	NaN	NaN	NaN	NaN	NaN	NaN	NaN
1959-10-22	NaN	NaN	NaN	17.6667	24.3889	7.77778	NaN	NaN	NaN	NaN	NaN	NaN	NaN	NaN	NaN
1959-10-23	NaN	NaN	NaN	17.2222	23.2778	9.38889	NaN	NaN	NaN	NaN	NaN	NaN	NaN	NaN	NaN
1959-10-24	NaN	NaN	NaN	19.2222	25	12.7778	NaN	NaN	NaN	NaN	NaN	NaN	NaN	NaN	NaN
1959-10-25	NaN	NaN	NaN	17.8889	22.7778	8.27778	NaN	NaN	NaN	NaN	NaN	NaN	NaN	NaN	NaN
1959-10-26	NaN	NaN	NaN	18.1111	23.2778	10	NaN	NaN	NaN	NaN	NaN	NaN	NaN	NaN	NaN
1959-10-27	NaN	NaN	NaN	16.3333	23.2778	6.72222	NaN	NaN	NaN	NaN	NaN	NaN	NaN	NaN	NaN
1959-10-28	NaN	NaN	NaN	18	23.8889	8.27778	NaN	NaN	NaN	NaN	NaN	NaN	NaN	NaN	NaN
1959-10-29	NaN	NaN	NaN	18.5556	25	5.61111	NaN	NaN	NaN	NaN	NaN	NaN	NaN	NaN	NaN
1959-10-30	NaN	NaN	NaN	18.5556	25	7.22222	NaN	NaN	NaN	NaN	NaN	NaN	NaN	NaN	NaN
1959-10-31	NaN	NaN	NaN	17.8889	25	8.27778	NaN	NaN	NaN	NaN	NaN	NaN	NaN	NaN	NaN
1959-11-01	NaN	NaN	NaN	17.4444	24.3889	8.88889	NaN	NaN	NaN	NaN	NaN	NaN	NaN	NaN	NaN
1959-11-02	NaN	NaN	NaN	18.1111	23.2778	8.88889	NaN	NaN	NaN	NaN	NaN	NaN	NaN	NaN	NaN
1959-11-03	NaN	NaN	NaN	18.1667	23.2778	14.3889	NaN	NaN	NaN	NaN	NaN	NaN	NaN	NaN	NaN
1959-11-04	NaN	NaN	NaN	19.1111	23.2778	14.3889	NaN	NaN	NaN	NaN	NaN	NaN	NaN	NaN	NaN
1959-11-05	NaN	NaN	NaN	18.7778	22.7778	13.2778	NaN	NaN	NaN	NaN	NaN	NaN	NaN	NaN	NaN
1959-11-06	NaN	NaN	NaN	17.2222	21.7222	12.7778	NaN	NaN	NaN	NaN	NaN	NaN	NaN	NaN	NaN
1959-11-07	NaN	NaN	NaN	18.1111	23.2778	10.6111	NaN	NaN	NaN	NaN	NaN	NaN	NaN	NaN	NaN
1959-11-08	NaN	NaN	NaN	19.1667	21.7222	15	NaN	NaN	NaN	NaN	NaN	NaN	NaN	NaN	NaN
1959-11-09	NaN	NaN	NaN	15.4444	19.3889	5	NaN	NaN	NaN	NaN	NaN	NaN	NaN	NaN	NaN
1959-11-10	NaN	NaN	NaN	17.3333	23.8889	4.38889	NaN	NaN	NaN	NaN	NaN	NaN	NaN	NaN	NaN
1959-11-11	NaN	NaN	NaN	18.5556	25	7.22222	NaN	NaN	NaN	NaN	NaN	NaN	NaN	NaN	NaN
1959-11-12	NaN	NaN	NaN	18.1111	23.8889	7.77778	NaN	NaN	NaN	NaN	NaN	NaN	NaN	NaN	NaN
1959-11-13	NaN	NaN	NaN	17.2222	23.8889	8.27778	NaN	NaN	NaN	NaN	NaN	NaN	NaN	NaN	NaN
1959-11-14	NaN	NaN	NaN	16.8889	21.7222	7.22222	NaN	NaN	NaN	NaN	NaN	NaN	NaN	NaN	NaN
1959-11-15	NaN	NaN	NaN	17.4444	20.6111	11.7222	NaN	NaN	NaN	NaN	NaN	NaN	NaN	NaN	NaN
1959-11-16	NaN	NaN	NaN	16.4444	22.2222	8.88889	NaN	NaN	NaN	NaN	NaN	NaN	NaN	NaN	NaN
1959-11-17	NaN	NaN	NaN	16.7778	24.3889	8.27778	NaN	NaN	NaN	NaN	NaN	NaN	NaN	NaN	NaN
1959-11-18	NaN	NaN	NaN	18.1111	25.6111	6.72222	NaN	NaN	NaN	NaN	NaN	NaN	NaN	NaN	NaN
1959-11-19	NaN	NaN	NaN	18.2222	23.2778	7.77778	NaN	NaN	NaN	NaN	NaN	NaN	NaN	NaN	NaN
1959-11-20	NaN	NaN	NaN	17.2222	22.2222	8.88889	NaN	NaN	NaN	NaN	NaN	NaN	NaN	NaN	NaN
1959-11-21	NaN	NaN	NaN	18.3333	25	10	NaN	NaN	NaN	NaN	NaN	NaN	NaN	NaN	NaN
1959-11-22	NaN	NaN	NaN	17	19.3889	13.8889	NaN	NaN	NaN	NaN	NaN	NaN	NaN	NaN	NaN
1959-11-23	NaN	NaN	NaN	16.2222	20	12.7778	NaN	NaN	NaN	NaN	NaN	NaN	NaN	NaN	NaN
1959-11-24	NaN	NaN	NaN	18	22.7778	12.7778	NaN	NaN	NaN	NaN	NaN	NaN	NaN	NaN	NaN
1959-11-25	NaN	NaN	NaN	20	24.3889	12.7778	NaN	NaN	NaN	NaN	NaN	NaN	NaN	NaN	NaN
1959-11-26	NaN	NaN	NaN	17.1111	19.3889	13.8889	NaN	NaN	NaN	NaN	NaN	NaN	NaN	NaN	NaN
1959-11-27	NaN	NaN	NaN	17.8333	21.1111	14.3889	NaN	NaN	NaN	NaN	NaN	NaN	NaN	NaN	NaN
1959-11-28	NaN	NaN	NaN	16.7778	22.2222	12.7778	NaN	NaN	NaN	NaN	NaN	NaN	NaN	NaN	NaN
1959-11-29	NaN	NaN	NaN	17.3333	22.7778	10.6111	NaN	NaN	NaN	NaN	NaN	NaN	NaN	NaN	NaN
1959-11-30	NaN	NaN	NaN	16.7778	22.7778	10.6111	NaN	NaN	NaN	NaN	NaN	NaN	NaN	NaN	NaN
1959-12-01	NaN	NaN	NaN	17.1111	23.2778	11.1111	NaN	NaN	NaN	NaN	NaN	NaN	NaN	NaN	NaN
1959-12-02	NaN	NaN	NaN	16.7778	20	12.2222	NaN	NaN	NaN	NaN	NaN	NaN	NaN	NaN	NaN
1959-12-03	NaN	NaN	NaN	19.3333	23.8889	10.6111	NaN	NaN	NaN	NaN	NaN	NaN	NaN	NaN	NaN
1959-12-04	NaN	NaN	NaN	21.6667	24.3889	17.7778	NaN	NaN	NaN	NaN	NaN	NaN	NaN	NaN	NaN
1959-12-05	NaN	NaN	NaN	19.2222	26.1111	6.11111	NaN	NaN	NaN	NaN	NaN	NaN	NaN	NaN	NaN
1959-12-06	NaN	NaN	NaN	18.6667	25.6111	4.38889	NaN	NaN	NaN	NaN	NaN	NaN	NaN	NaN	NaN
1959-12-07	NaN	NaN	NaN	19.3333	25	7.77778	NaN	NaN	NaN	NaN	NaN	NaN	NaN	NaN	NaN
1959-12-08	NaN	NaN	NaN	19.2222	26.1111	5.61111	NaN	NaN	NaN	NaN	NaN	NaN	NaN	NaN	NaN
1959-12-09	NaN	NaN	NaN	22.3889	25.6111	17.7778	NaN	NaN	NaN	NaN	NaN	NaN	NaN	NaN	NaN
1959-12-10	NaN	NaN	NaN	19.2222	24.3889	10	NaN	NaN	NaN	NaN	NaN	NaN	NaN	NaN	NaN
1959-12-11	NaN	NaN	NaN	17.7778	20	12.2222	NaN	NaN	NaN	NaN	NaN	NaN	NaN	NaN	NaN
1959-12-12	NaN	NaN	NaN	20.7778	26.1111	13.8889	NaN	NaN	NaN	NaN	NaN	NaN	NaN	NaN	NaN
1959-12-13	NaN	NaN	NaN	19	25.6111	7.77778	NaN	NaN	NaN	NaN	NaN	NaN	NaN	NaN	NaN
1959-12-14	NaN	NaN	NaN	18.6667	26.7222	5	NaN	NaN	NaN	NaN	NaN	NaN	NaN	NaN	NaN
1959-12-15	NaN	NaN	NaN	18.3333	25	6.11111	NaN	NaN	NaN	NaN	NaN	NaN	NaN	NaN	NaN
1959-12-16	NaN	NaN	NaN	18.7778	23.2778	9.38889	NaN	NaN	NaN	NaN	NaN	NaN	NaN	NaN	NaN
1959-12-17	NaN	NaN	NaN	15.4444	17.2222	13.8889	NaN	NaN	NaN	NaN	NaN	NaN	NaN	NaN	NaN
1959-12-18	NaN	NaN	NaN	17.6667	23.8889	8.88889	NaN	NaN	NaN	NaN	NaN	NaN	NaN	NaN	NaN
1959-12-19	NaN	NaN	NaN	18.2222	22.2222	11.1111	NaN	NaN	NaN	NaN	NaN	NaN	NaN	NaN	NaN
1959-12-20	NaN	NaN	NaN	18.8889	22.7778	10.6111	NaN	NaN	NaN	NaN	NaN	NaN	NaN	NaN	NaN
1959-12-21	NaN	NaN	NaN	17.4444	22.2222	12.2222	NaN	NaN	NaN	NaN	NaN	NaN	NaN	NaN	NaN
1959-12-22	NaN	NaN	NaN	18.7778	25	6.11111	NaN	NaN	NaN	NaN	NaN	NaN	NaN	NaN	NaN
1959-12-23	NaN	NaN	NaN	20.2222	26.7222	7.22222	NaN	NaN	NaN	NaN	NaN	NaN	NaN	NaN	NaN
1959-12-24	NaN	NaN	NaN	19.5556	26.7222	7.22222	NaN	NaN	NaN	NaN	NaN	NaN	NaN	NaN	NaN
1959-12-25	NaN	NaN	NaN	20	26.1111	9.38889	NaN	NaN	NaN	NaN	NaN	NaN	NaN	NaN	NaN
1959-12-26	NaN	NaN	NaN	19.4444	24.3889	8.88889	NaN	NaN	NaN	NaN	NaN	NaN	NaN	NaN	NaN
1959-12-27	NaN	NaN	NaN	19.4444	25.6111	5.61111	NaN	NaN	NaN	NaN	NaN	NaN	NaN	NaN	NaN
1959-12-28	NaN	NaN	NaN	18.1111	25	7.22222	NaN	NaN	NaN	NaN	NaN	NaN	NaN	NaN	NaN
1959-12-29	NaN	NaN	NaN	19.2222	25.6111	7.77778	NaN	NaN	NaN	NaN	NaN	NaN	NaN	NaN	NaN
1959-12-30	NaN	NaN	NaN	19.0556	25.6111	8.27778	NaN	NaN	NaN	NaN	NaN	NaN	NaN	NaN	NaN
1959-12-31	NaN	NaN	NaN	20.3333	27.7778	8.27778	NaN	NaN	NaN	NaN	NaN	NaN	NaN	NaN	NaN
1960-01-01	NaN	NaN	NaN	19.6667	25	7.77778	NaN	NaN	NaN	NaN	NaN	NaN	NaN	NaN	NaN
1960-01-02	NaN	NaN	NaN	19.6667	25.6111	7.77778	NaN	NaN	NaN	NaN	NaN	NaN	NaN	NaN	NaN
1960-01-03	NaN	NaN	NaN	20.3333	26.1111	8.27778	NaN	NaN	NaN	NaN	NaN	NaN	NaN	NaN	NaN
1960-01-04	NaN	NaN	NaN	20.1111	27.7778	7.22222	NaN	NaN	NaN	NaN	NaN	NaN	NaN	NaN	NaN
1960-01-05	NaN	NaN	NaN	20.1111	26.1111	6.72222	NaN	NaN	NaN	NaN	NaN	NaN	NaN	NaN	NaN
1960-01-06	NaN	NaN	NaN	20.6667	27.2222	7.22222	NaN	NaN	NaN	NaN	NaN	NaN	NaN	NaN	NaN
1960-01-07	NaN	NaN	NaN	20.6667	28.8889	7.22222	NaN	NaN	NaN	NaN	NaN	NaN	NaN	NaN	NaN
1960-01-08	NaN	NaN	NaN	19.5556	26.1111	7.77778	NaN	NaN	NaN	NaN	NaN	NaN	NaN	NaN	NaN
1960-01-09	NaN	NaN	NaN	19.1111	27.2222	8.27778	NaN	NaN	NaN	NaN	NaN	NaN	NaN	NaN	NaN
1960-01-10	NaN	NaN	NaN	20.4444	26.7222	8.88889	NaN	NaN	NaN	NaN	NaN	NaN	NaN	NaN	NaN
1960-01-11	NaN	NaN	NaN	21.3333	28.8889	9.38889	NaN	NaN	NaN	NaN	NaN	NaN	NaN	NaN	NaN
1960-01-12	NaN	NaN	NaN	21.8889	27.2222	13.2778	NaN	NaN	NaN	NaN	NaN	NaN	NaN	NaN	NaN
1960-01-13	21.6667	24.3889	18.8889	21.8889	26.7222	13.2778	NaN	NaN	NaN	NaN	NaN	NaN	NaN	NaN	NaN
1960-01-14	NaN	NaN	NaN	21.7778	27.2222	11.1111	NaN	NaN	NaN	NaN	NaN	NaN	NaN	NaN	NaN
1960-01-15	NaN	NaN	NaN	20.3333	26.7222	7.77778	NaN	NaN	NaN	NaN	NaN	NaN	NaN	NaN	NaN
1960-01-16	25.3333	28.8889	20.6111	19.6667	27.2222	7.77778	NaN	NaN	NaN	NaN	NaN	NaN	NaN	NaN	NaN
1960-01-17	22.8889	24.3889	21.7222	20.7778	25.6111	14.3889	NaN	NaN	NaN	NaN	NaN	NaN	NaN	NaN	NaN
1960-01-18	23.3333	26.1111	21.1111	21.4444	27.7778	12.2222	NaN	NaN	NaN	NaN	NaN	NaN	NaN	NaN	NaN
1960-01-19	23.7778	26.1111	19.3889	20	26.7222	7.77778	NaN	NaN	NaN	NaN	NaN	NaN	NaN	NaN	NaN
1960-01-20	23.8889	25.6111	21.1111	19.6667	27.2222	5.61111	NaN	NaN	NaN	NaN	NaN	NaN	NaN	NaN	NaN
1960-01-21	23.4444	27.7778	19.3889	20.2222	26.7222	11.7222	NaN	NaN	NaN	NaN	NaN	NaN	NaN	NaN	NaN
1960-01-22	19.4444	20.6111	18.8889	19.5556	25	8.27778	NaN	NaN	NaN	NaN	NaN	NaN	NaN	NaN	NaN
1960-01-23	20.6667	22.7778	18.2778	18.7778	25	11.7222	NaN	NaN	NaN	NaN	NaN	NaN	NaN	NaN	NaN
1960-01-24	22.7778	27.2222	18.2778	16.8889	20	13.8889	NaN	NaN	NaN	NaN	NaN	NaN	NaN	NaN	NaN
1960-01-25	22.9444	25.6111	17.2222	18.7778	25.6111	12.7778	NaN	NaN	NaN	NaN	NaN	NaN	NaN	NaN	NaN
1960-01-26	22.3333	25	19.3889	18.7222	22.7778	12.7778	NaN	NaN	NaN	NaN	NaN	NaN	NaN	NaN	NaN
1960-01-27	22.6667	24.3889	19.3889	18.1111	23.2778	7.77778	NaN	NaN	NaN	NaN	NaN	NaN	NaN	NaN	NaN
1960-01-28	23.5556	26.7222	18.8889	18.7778	27.2222	5	NaN	NaN	NaN	NaN	NaN	NaN	NaN	NaN	NaN
1960-01-29	24.7778	27.2222	22.7778	19.3333	26.7222	8.27778	NaN	NaN	NaN	NaN	NaN	NaN	NaN	NaN	NaN
1960-01-30	24.4444	26.7222	20.6111	19.1111	25.6111	7.77778	NaN	NaN	NaN	NaN	NaN	NaN	NaN	NaN	NaN
1960-01-31	24.6667	28.2778	20.6111	20.4444	25	12.2222	NaN	NaN	NaN	NaN	NaN	NaN	NaN	NaN	NaN
1960-02-01	23.2222	26.1111	20	20.2222	26.1111	10	NaN	NaN	NaN	NaN	NaN	NaN	NaN	NaN	NaN
1960-02-02	23.4444	25	20.6111	18.7778	26.1111	7.22222	NaN	NaN	NaN	NaN	NaN	NaN	NaN	NaN	NaN
1960-02-03	24.5556	27.2222	20.6111	19	25.6111	7.22222	NaN	NaN	NaN	NaN	NaN	NaN	NaN	NaN	NaN
1960-02-04	25.6667	28.2778	22.2222	19.2222	26.7222	8.88889	NaN	NaN	NaN	NaN	NaN	NaN	NaN	NaN	NaN
1960-02-05	25	27.2222	21.7222	21.1111	27.2222	8.88889	NaN	NaN	NaN	NaN	NaN	NaN	NaN	NaN	NaN
1960-02-06	25.2222	30	20.6111	20.6667	26.7222	11.7222	NaN	NaN	NaN	NaN	NaN	NaN	NaN	NaN	NaN
1960-02-07	25.1111	28.2778	20	20.4444	26.7222	9.38889	NaN	NaN	NaN	NaN	NaN	NaN	NaN	NaN	NaN
1960-02-08	25.2778	26.7222	21.7222	20.7778	28.2778	8.27778	NaN	NaN	NaN	NaN	NaN	NaN	NaN	NaN	NaN
1960-02-09	24.5556	26.7222	21.1111	20.4444	28.2778	5	NaN	NaN	NaN	NaN	NaN	NaN	NaN	NaN	NaN
1960-02-10	25.1111	28.2778	19.3889	20.3333	28.8889	4.38889	NaN	NaN	NaN	NaN	NaN	NaN	NaN	NaN	NaN
1960-02-11	25	27.7778	21.7222	20.6667	28.8889	9.38889	NaN	NaN	NaN	NaN	NaN	NaN	NaN	NaN	NaN
1960-02-12	23.8889	27.2222	19.3889	18.6667	27.2222	5	NaN	NaN	NaN	NaN	NaN	NaN	NaN	NaN	NaN
1960-02-13	23.5556	27.2222	19.3889	20.6667	28.2778	6.72222	NaN	NaN	NaN	NaN	NaN	NaN	NaN	NaN	NaN
1960-02-14	24.1111	26.7222	20.6111	19.5556	25	7.77778	NaN	NaN	NaN	NaN	NaN	NaN	NaN	NaN	NaN
1960-02-15	24.7778	26.7222	21.1111	18.9444	27.7778	8.88889	NaN	NaN	NaN	NaN	NaN	NaN	NaN	NaN	NaN
1960-02-16	22.8889	26.7222	18.2778	18.5556	25	9.38889	NaN	NaN	NaN	NaN	NaN	NaN	NaN	NaN	NaN
1960-02-17	21.3333	23.2778	17.7778	19.3333	26.1111	6.72222	NaN	NaN	NaN	NaN	NaN	NaN	NaN	NaN	NaN
1960-02-18	23.4444	25.6111	19.3889	18.7778	25.6111	8.27778	NaN	NaN	NaN	NaN	NaN	NaN	NaN	NaN	NaN
1960-02-19	23.3333	27.2222	19.3889	21.2222	26.1111	11.7222	NaN	NaN	NaN	NaN	NaN	NaN	NaN	NaN	NaN
1960-02-20	24.6667	28.2778	20	22.4444	29.3889	11.7222	NaN	NaN	NaN	NaN	NaN	NaN	NaN	NaN	NaN
1960-02-21	23.3333	26.7222	18.2778	20.1111	28.2778	5	NaN	NaN	NaN	NaN	NaN	NaN	NaN	NaN	NaN
1960-02-22	24.4444	26.7222	20	20.1111	28.8889	3.88889	NaN	NaN	NaN	NaN	NaN	NaN	NaN	NaN	NaN
1960-02-23	26	28.8889	21.1111	20.7778	28.2778	6.72222	NaN	NaN	NaN	NaN	NaN	NaN	NaN	NaN	NaN
1960-02-24	22	25	18.2778	20.5556	27.2222	8.88889	NaN	NaN	NaN	NaN	NaN	NaN	NaN	NaN	NaN
1960-02-25	22.4444	24.3889	19.3889	20.1111	27.2222	8.88889	NaN	NaN	NaN	NaN	NaN	NaN	NaN	NaN	NaN
1960-02-26	22.3333	27.7778	17.7778	20.4444	27.2222	10	NaN	NaN	NaN	NaN	NaN	NaN	NaN	NaN	NaN
1960-02-27	20.4444	22.2222	18.8889	21.4444	27.2222	9.38889	NaN	NaN	NaN	NaN	NaN	NaN	NaN	NaN	NaN
1960-02-28	22.8889	26.7222	19.3889	19.7778	26.7222	6.72222	NaN	NaN	NaN	NaN	NaN	NaN	NaN	NaN	NaN
1960-02-29	22.2222	26.7222	18.8889	20.6667	27.7778	7.22222	NaN	NaN	NaN	NaN	NaN	NaN	NaN	NaN	NaN
1960-03-01	23.5	26.7222	18.8889	21.3333	27.7778	8.88889	NaN	NaN	NaN	NaN	NaN	NaN	NaN	NaN	NaN
1960-03-02	22.3333	25	19.3889	20.6667	26.1111	8.88889	NaN	NaN	NaN	NaN	NaN	NaN	NaN	NaN	NaN
1960-03-03	22.8889	26.1111	19.3889	20.6667	26.1111	9.38889	NaN	NaN	NaN	NaN	NaN	NaN	NaN	NaN	NaN
1960-03-04	22.4444	25.6111	18.2778	19.1111	26.1111	8.88889	NaN	NaN	NaN	NaN	NaN	NaN	NaN	NaN	NaN
1960-03-05	24.5556	29.3889	19.3889	21	27.2222	12.7778	NaN	NaN	NaN	NaN	NaN	NaN	NaN	NaN	NaN
1960-03-06	24.4444	27.2222	20	20	26.7222	7.77778	NaN	NaN	NaN	NaN	NaN	NaN	NaN	NaN	NaN
1960-03-07	24.8889	26.7222	22.2222	19	25.6111	6.72222	NaN	NaN	NaN	NaN	NaN	NaN	NaN	NaN	NaN
1960-03-08	24.8889	27.7778	20	20.6667	27.2222	8.88889	NaN	NaN	NaN	NaN	NaN	NaN	NaN	NaN	NaN
1960-03-09	22.6667	26.1111	18.8889	20.7778	29.3889	7.77778	NaN	NaN	NaN	NaN	NaN	NaN	NaN	NaN	NaN
1960-03-10	24.3333	27.2222	19.3889	20.8889	29.3889	7.22222	NaN	NaN	NaN	NaN	NaN	NaN	NaN	NaN	NaN
1960-03-11	22.6667	26.1111	18.8889	21.5556	28.2778	8.88889	NaN	NaN	NaN	NaN	NaN	NaN	NaN	NaN	NaN
1960-03-12	24.3333	26.7222	20.6111	21.4444	28.2778	8.88889	NaN	NaN	NaN	NaN	NaN	NaN	NaN	NaN	NaN
1960-03-13	23.4444	26.7222	19.3889	20.8889	27.7778	7.22222	NaN	NaN	NaN	NaN	NaN	NaN	NaN	NaN	NaN
1960-03-14	20.4444	22.7778	17.7778	21.7778	28.2778	8.88889	NaN	NaN	NaN	NaN	NaN	NaN	NaN	NaN	NaN
1960-03-15	23.6667	26.7222	20.6111	17.6667	21.1111	12.7778	NaN	NaN	NaN	NaN	NaN	NaN	NaN	NaN	NaN
1960-03-16	21.2222	23.8889	18.2778	15.6667	23.2778	10	NaN	NaN	NaN	NaN	NaN	NaN	NaN	NaN	NaN
1960-03-17	23.2222	27.2222	19.3889	17.5556	21.7222	11.7222	NaN	NaN	NaN	NaN	NaN	NaN	NaN	NaN	NaN
1960-03-18	22.3333	24.3889	20	18	23.8889	9.38889	NaN	NaN	NaN	NaN	NaN	NaN	NaN	NaN	NaN
1960-03-19	20.8889	21.7222	20	18	22.7778	14.3889	NaN	NaN	NaN	NaN	NaN	NaN	NaN	NaN	NaN
1960-03-20	18.4444	20	17.2222	16.8889	22.2222	12.2222	NaN	NaN	NaN	NaN	NaN	NaN	NaN	NaN	NaN
1960-03-21	23.4444	26.1111	20	17.3333	22.2222	13.2778	NaN	NaN	NaN	NaN	NaN	NaN	NaN	NaN	NaN
1960-03-22	23	26.1111	18.2778	16.1111	21.7222	7.22222	NaN	NaN	NaN	NaN	NaN	NaN	NaN	NaN	NaN
1960-03-23	24	27.2222	20	19.5556	25.6111	10	NaN	NaN	NaN	NaN	NaN	NaN	NaN	NaN	NaN
1960-03-24	23.1111	25	20.6111	15.7778	19.3889	11.1111	NaN	NaN	NaN	NaN	NaN	NaN	NaN	NaN	NaN
1960-03-25	23	25.6111	19.3889	18.6667	26.7222	8.27778	NaN	NaN	NaN	NaN	NaN	NaN	NaN	NaN	NaN
1960-03-26	22.1111	25.6111	18.2778	19.8889	25	12.7778	NaN	NaN	NaN	NaN	NaN	NaN	NaN	NaN	NaN
1960-03-27	23.5556	26.7222	19.3889	17.3333	23.2778	11.1111	NaN	NaN	NaN	NaN	NaN	NaN	NaN	NaN	NaN
1960-03-28	22.8889	25.6111	20	18.3333	24.3889	13.2778	NaN	NaN	NaN	NaN	NaN	NaN	NaN	NaN	NaN
1960-03-29	23.7778	27.2222	20	18.2222	22.7778	13.2778	NaN	NaN	NaN	NaN	NaN	NaN	NaN	NaN	NaN
1960-03-30	25	27.7778	21.7222	18.2222	22.7778	10.6111	NaN	NaN	NaN	NaN	NaN	NaN	NaN	NaN	NaN
1960-03-31	23.8889	26.7222	20	17.3333	22.7778	13.8889	NaN	NaN	NaN	NaN	NaN	NaN	NaN	NaN	NaN
1960-04-01	24.1111	26.7222	20.6111	16.1111	21.7222	11.1111	NaN	NaN	NaN	NaN	NaN	NaN	NaN	NaN	NaN
1960-04-02	24	26.7222	20	18.5556	25.6111	12.2222	NaN	NaN	NaN	NaN	NaN	NaN	NaN	NaN	NaN
1960-04-03	24.5556	27.7778	20	19	24.3889	10.6111	NaN	NaN	NaN	NaN	NaN	NaN	NaN	NaN	NaN
1960-04-04	22.3333	26.1111	18.2778	19.3333	24.3889	10	NaN	NaN	NaN	NaN	NaN	NaN	NaN	NaN	NaN
1960-04-05	23.3333	25.6111	20.6111	17.6667	23.2778	12.7778	NaN	NaN	NaN	NaN	NaN	NaN	NaN	NaN	NaN
1960-04-06	24.8889	26.7222	21.7222	19.3333	22.2222	15	NaN	NaN	NaN	NaN	NaN	NaN	NaN	NaN	NaN
1960-04-07	24.3333	26.7222	20.6111	20.2222	25	15	NaN	NaN	NaN	NaN	NaN	NaN	NaN	NaN	NaN
1960-04-08	24.3333	27.2222	19.3889	20.3333	25.6111	11.7222	NaN	NaN	NaN	NaN	NaN	NaN	NaN	NaN	NaN
1960-04-09	24.8889	26.7222	21.7222	17.6667	22.2222	10	NaN	NaN	NaN	NaN	NaN	NaN	NaN	NaN	NaN
1960-04-10	24.6667	27.2222	21.1111	18.2222	23.8889	12.2222	NaN	NaN	NaN	NaN	NaN	NaN	NaN	NaN	NaN
1960-04-11	21.4444	22.7778	20	18.7778	22.7778	11.7222	NaN	NaN	NaN	NaN	NaN	NaN	NaN	NaN	NaN
1960-04-12	23	24.3889	20.6111	20	22.7778	14.3889	NaN	NaN	NaN	NaN	NaN	NaN	NaN	NaN	NaN
1960-04-13	23.8889	26.7222	18.8889	19.1111	22.7778	15	NaN	NaN	NaN	NaN	NaN	NaN	NaN	NaN	NaN
1960-04-14	23	24.3889	20.6111	17	21.1111	12.7778	NaN	NaN	NaN	NaN	NaN	NaN	NaN	NaN	NaN
1960-04-15	23.3333	25.6111	20.6111	18.3333	22.7778	12.7778	NaN	NaN	NaN	NaN	NaN	NaN	NaN	NaN	NaN
1960-04-16	23.5556	26.1111	20	17.1667	21.7222	12.7778	NaN	NaN	NaN	NaN	NaN	NaN	NaN	NaN	NaN
1960-04-17	23.6667	26.1111	21.1111	17.4444	20	12.7778	NaN	NaN	NaN	NaN	NaN	NaN	NaN	NaN	NaN
1960-04-18	23.1111	26.1111	20	15.6667	18.2778	10.6111	NaN	NaN	NaN	NaN	NaN	NaN	NaN	NaN	NaN
1960-04-19	23.5556	26.7222	20.6111	19	24.3889	12.7778	NaN	NaN	NaN	NaN	NaN	NaN	NaN	NaN	NaN
1960-04-20	24.3333	27.2222	21.1111	16.7778	22.2222	8.88889	NaN	NaN	NaN	NaN	NaN	NaN	NaN	NaN	NaN
1960-04-21	24.2222	28.2778	19.3889	19.4444	26.1111	8.27778	NaN	NaN	NaN	NaN	NaN	NaN	NaN	NaN	NaN
1960-04-22	24.5556	27.7778	21.1111	18.4444	25.6111	7.22222	NaN	NaN	NaN	NaN	NaN	NaN	NaN	NaN	NaN
1960-04-23	21.7778	25	18.8889	18.1111	22.7778	13.2778	NaN	NaN	NaN	NaN	NaN	NaN	NaN	NaN	NaN
1960-04-24	23.6667	27.2222	20	20.4444	26.1111	13.2778	NaN	NaN	NaN	NaN	NaN	NaN	NaN	NaN	NaN
1960-04-25	24	27.7778	20	19	25.6111	8.27778	NaN	NaN	NaN	NaN	NaN	NaN	NaN	NaN	NaN
1960-04-26	24.4444	27.7778	20.6111	20	23.8889	14.3889	NaN	NaN	NaN	NaN	NaN	NaN	NaN	NaN	NaN
1960-04-27	24.3333	27.7778	20.6111	18.6667	23.2778	11.1111	NaN	NaN	NaN	NaN	NaN	NaN	NaN	NaN	NaN
1960-04-28	24.1667	26.7222	20.6111	17.3333	23.2778	9.38889	NaN	NaN	NaN	NaN	NaN	NaN	NaN	NaN	NaN
1960-04-29	22.8889	25.6111	19.3889	17.3333	22.7778	12.7778	NaN	NaN	NaN	NaN	NaN	NaN	NaN	NaN	NaN
1960-04-30	24.3333	27.2222	21.1111	18.4444	25	11.7222	NaN	NaN	NaN	NaN	NaN	NaN	NaN	NaN	NaN
1960-05-01	24.8889	28.2778	20.6111	18.1111	22.7778	12.7778	NaN	NaN	NaN	NaN	NaN	NaN	NaN	NaN	NaN
1960-05-02	24.5556	27.7778	21.1111	17.8889	23.2778	10.6111	NaN	NaN	NaN	NaN	NaN	NaN	NaN	NaN	NaN
1960-05-03	24.3333	27.7778	19.3889	18.2222	22.2222	12.2222	NaN	NaN	NaN	NaN	NaN	NaN	NaN	NaN	NaN
1960-05-04	24.1111	27.7778	18.2778	19.7778	23.8889	10.6111	NaN	NaN	NaN	NaN	NaN	NaN	NaN	NaN	NaN
1960-05-05	24.1111	28.2778	18.8889	19.2222	25	11.1111	NaN	NaN	NaN	NaN	NaN	NaN	NaN	NaN	NaN
1960-05-06	24.5556	28.2778	19.3889	16.7778	22.2222	7.77778	NaN	NaN	NaN	NaN	NaN	NaN	NaN	NaN	NaN
1960-05-07	24.2222	28.2778	18.8889	17.6667	22.7778	10.6111	NaN	NaN	NaN	NaN	NaN	NaN	NaN	NaN	NaN
1960-05-08	26	29.3889	20	18.7778	25	8.88889	NaN	NaN	NaN	NaN	NaN	NaN	NaN	NaN	NaN
1960-05-09	25	29.3889	19.3889	18.8889	23.8889	7.77778	NaN	NaN	NaN	NaN	NaN	NaN	NaN	NaN	NaN
1960-05-10	24.5556	28.8889	18.2778	17.5556	22.2222	10	NaN	NaN	NaN	NaN	NaN	NaN	NaN	NaN	NaN
1960-05-11	23.2222	25.6111	19.3889	17.6667	25.6111	8.27778	NaN	NaN	NaN	NaN	NaN	NaN	NaN	NaN	NaN
1960-05-12	23.4444	25.6111	20.6111	18.8889	24.3889	11.7222	NaN	NaN	NaN	NaN	NaN	NaN	NaN	NaN	NaN
1960-05-13	24.0556	26.7222	20.6111	17.5556	22.2222	11.7222	NaN	NaN	NaN	NaN	NaN	NaN	NaN	NaN	NaN
1960-05-14	24.2222	26.7222	20.6111	19.5556	26.1111	8.88889	NaN	NaN	NaN	NaN	NaN	NaN	NaN	NaN	NaN
1960-05-15	23.7778	26.1111	20	19.1111	25.6111	8.27778	NaN	NaN	NaN	NaN	NaN	NaN	NaN	NaN	NaN
1960-05-16	24.4444	27.7778	20.6111	19.3333	26.7222	7.22222	NaN	NaN	NaN	NaN	NaN	NaN	NaN	NaN	NaN
1960-05-17	24.3333	27.2222	20.6111	19.2222	26.7222	5.61111	NaN	NaN	NaN	NaN	NaN	NaN	NaN	NaN	NaN
1960-05-18	24.2222	27.2222	19.3889	19.2222	27.2222	5.61111	NaN	NaN	NaN	NaN	NaN	NaN	NaN	NaN	NaN
1960-05-19	24.2222	27.2222	20.6111	18.4444	23.8889	7.22222	NaN	NaN	NaN	NaN	NaN	NaN	NaN	NaN	NaN
1960-05-20	24.1667	26.7222	20.6111	19.2222	25	15.6111	NaN	NaN	NaN	NaN	NaN	NaN	NaN	NaN	NaN
1960-05-21	25	27.7778	20.6111	18.3333	25	11.1111	NaN	NaN	NaN	NaN	NaN	NaN	NaN	NaN	NaN
1960-05-22	24.3333	27.7778	20	19.2222	24.3889	12.2222	NaN	NaN	NaN	NaN	NaN	NaN	NaN	NaN	NaN
1960-05-23	24.6667	27.7778	20	18.1111	23.2778	10.6111	NaN	NaN	NaN	NaN	NaN	NaN	NaN	NaN	NaN
1960-05-24	25.1111	29.3889	20	20.1111	24.3889	11.7222	NaN	NaN	NaN	NaN	NaN	NaN	NaN	NaN	NaN
1960-05-25	25	28.8889	19.3889	16.5556	23.8889	7.77778	NaN	NaN	NaN	NaN	NaN	NaN	NaN	NaN	NaN
1960-05-26	23.2222	25.6111	20	18.6667	23.2778	12.7778	NaN	NaN	NaN	NaN	NaN	NaN	NaN	NaN	NaN
1960-05-27	20.8889	23.8889	18.8889	18.3333	21.1111	13.2778	NaN	NaN	NaN	NaN	NaN	NaN	NaN	NaN	NaN
1960-05-28	22.6667	24.3889	21.1111	17.1111	21.7222	12.7778	NaN	NaN	NaN	NaN	NaN	NaN	NaN	NaN	NaN
1960-05-29	24.5556	27.2222	20.6111	17.6667	23.2778	11.1111	NaN	NaN	NaN	NaN	NaN	NaN	NaN	NaN	NaN
1960-05-30	24.2222	26.7222	19.3889	17	25	7.22222	NaN	NaN	NaN	NaN	NaN	NaN	NaN	NaN	NaN
1960-05-31	24.4444	26.1111	20.6111	17.3333	23.2778	7.22222	NaN	NaN	NaN	NaN	NaN	NaN	NaN	NaN	NaN
1960-06-01	24.1111	27.7778	19.3889	17.4444	22.2222	13.8889	NaN	NaN	NaN	NaN	NaN	NaN	NaN	NaN	NaN
1960-06-02	24	27.7778	18.8889	17.4444	22.7778	7.77778	NaN	NaN	NaN	NaN	NaN	NaN	NaN	NaN	NaN
1960-06-03	23.7778	26.7222	19.3889	17.7778	23.2778	8.27778	NaN	NaN	NaN	NaN	NaN	NaN	NaN	NaN	NaN
1960-06-04	24.1667	26.7222	20.6111	18.2222	25	6.72222	NaN	NaN	NaN	NaN	NaN	NaN	NaN	NaN	NaN
1960-06-05	23.6667	27.2222	18.2778	19	25.6111	7.22222	NaN	NaN	NaN	NaN	NaN	NaN	NaN	NaN	NaN
1960-06-06	23.9444	27.7778	20.6111	17.8889	25	8.27778	NaN	NaN	NaN	NaN	NaN	NaN	NaN	NaN	NaN
1960-06-07	24.5556	28.8889	20	18.8889	23.8889	13.2778	NaN	NaN	NaN	NaN	NaN	NaN	NaN	NaN	NaN
1960-06-08	24.1111	27.2222	20.6111	19.8889	23.2778	14.3889	NaN	NaN	NaN	NaN	NaN	NaN	NaN	NaN	NaN
1960-06-09	25.4444	28.2778	21.7222	19.6667	24.3889	11.7222	NaN	NaN	NaN	NaN	NaN	NaN	NaN	NaN	NaN
1960-06-10	24.7778	28.2778	19.3889	19.3333	25.6111	10.6111	NaN	NaN	NaN	NaN	NaN	NaN	NaN	NaN	NaN
1960-06-11	24.8889	27.7778	20.6111	17.7778	23.2778	7.77778	NaN	NaN	NaN	NaN	NaN	NaN	NaN	NaN	NaN
1960-06-12	24	28.2778	18.2778	17.7778	25	5	NaN	NaN	NaN	NaN	NaN	NaN	NaN	NaN	NaN
1960-06-13	24.3333	27.7778	19.3889	17.5556	23.2778	6.72222	NaN	NaN	NaN	NaN	NaN	NaN	NaN	NaN	NaN
1960-06-14	24.2222	27.7778	19.3889	17.1111	23.2778	6.72222	NaN	NaN	NaN	NaN	NaN	NaN	NaN	NaN	NaN
1960-06-15	22.6667	26.7222	19.3889	18.3333	23.8889	8.88889	NaN	NaN	NaN	NaN	NaN	NaN	NaN	NaN	NaN
1960-06-16	23.7778	26.1111	20	17.6667	25	4.38889	NaN	NaN	NaN	NaN	NaN	NaN	NaN	NaN	NaN
1960-06-17	23.8889	27.7778	19.3889	17.6667	25	6.72222	NaN	NaN	NaN	NaN	NaN	NaN	NaN	NaN	NaN
1960-06-18	25	29.3889	20.6111	18.3333	24.3889	7.77778	NaN	NaN	NaN	NaN	NaN	NaN	NaN	NaN	NaN
1960-06-19	24.3333	26.7222	21.7222	17.5556	22.7778	5.61111	NaN	NaN	NaN	NaN	NaN	NaN	NaN	NaN	NaN
1960-06-20	22.9444	26.1111	19.3889	16.7778	23.2778	3.88889	NaN	NaN	NaN	NaN	NaN	NaN	NaN	NaN	NaN
1960-06-21	23.5	27.7778	19.3889	17.4444	25	4.38889	NaN	NaN	NaN	NaN	NaN	NaN	NaN	NaN	NaN
1960-06-22	23.7778	26.7222	20	17.6667	25	5	NaN	NaN	NaN	NaN	NaN	NaN	NaN	NaN	NaN
1960-06-23	24.1667	28.8889	20	17.8889	25	7.22222	NaN	NaN	NaN	NaN	NaN	NaN	NaN	NaN	NaN
1960-06-24	24.2778	29.3889	19.3889	18.4444	25	7.22222	NaN	NaN	NaN	NaN	NaN	NaN	NaN	NaN	NaN
1960-06-25	23.5	27.2222	20	18.3333	27.2222	6.72222	NaN	NaN	NaN	NaN	NaN	NaN	NaN	NaN	NaN
1960-06-26	23.0556	26.7222	20	18	21.1111	13.2778	NaN	NaN	NaN	NaN	NaN	NaN	NaN	NaN	NaN
1960-06-27	22.9444	25	20.6111	16.4444	24.3889	8.27778	NaN	NaN	NaN	NaN	NaN	NaN	NaN	NaN	NaN
1960-06-28	23.8889	26.7222	20.6111	18	24.3889	8.88889	NaN	NaN	NaN	NaN	NaN	NaN	NaN	NaN	NaN
1960-06-29	23.6667	26.7222	20.6111	18.1111	22.7778	12.7778	NaN	NaN	NaN	NaN	NaN	NaN	NaN	NaN	NaN
1960-06-30	24	30	20	18.1111	22.2222	13.8889	NaN	NaN	NaN	NaN	NaN	NaN	NaN	NaN	NaN
1960-07-01	23.0556	27.2222	20	19	22.7778	12.7778	NaN	NaN	NaN	NaN	NaN	NaN	NaN	NaN	NaN
1960-07-02	23.7778	26.1111	20.6111	17.7778	24.3889	12.2222	NaN	NaN	NaN	NaN	NaN	NaN	NaN	NaN	NaN
1960-07-03	23.5	27.7778	18.8889	16.8889	22.7778	13.2778	NaN	NaN	NaN	NaN	NaN	NaN	NaN	NaN	NaN
1960-07-04	24.4444	27.2222	21.1111	18.8889	23.2778	12.7778	NaN	NaN	NaN	NaN	NaN	NaN	NaN	NaN	NaN
1960-07-05	23.2222	26.7222	20.6111	15.8889	18.8889	11.7222	NaN	NaN	NaN	NaN	NaN	NaN	NaN	NaN	NaN
1960-07-06	23.0556	25.6111	20	18.1111	23.2778	12.2222	NaN	NaN	NaN	NaN	NaN	NaN	NaN	NaN	NaN
1960-07-07	23.6111	27.7778	20	15.8889	22.7778	5.61111	NaN	NaN	NaN	NaN	NaN	NaN	NaN	NaN	NaN
1960-07-08	21.7778	26.1111	18.2778	17.5556	22.7778	8.27778	NaN	NaN	NaN	NaN	NaN	NaN	NaN	NaN	NaN
1960-07-09	23.6111	27.2222	20.6111	17.3333	24.3889	9.38889	NaN	NaN	NaN	NaN	NaN	NaN	NaN	NaN	NaN
1960-07-10	24.5	28.8889	20.6111	17.5	22.7778	12.7778	NaN	NaN	NaN	NaN	NaN	NaN	NaN	NaN	NaN
1960-07-11	23.5	27.2222	20	18.5556	22.7778	13.2778	NaN	NaN	NaN	NaN	NaN	NaN	NaN	NaN	NaN
1960-07-12	22.7778	27.7778	16.7222	17	23.2778	5.61111	NaN	NaN	NaN	NaN	NaN	NaN	NaN	NaN	NaN
1960-07-13	22.7778	28.8889	15.6111	17.8889	23.8889	7.22222	NaN	NaN	NaN	NaN	NaN	NaN	NaN	NaN	NaN
1960-07-14	22.9444	27.7778	18.8889	19	24.3889	10	NaN	NaN	NaN	NaN	NaN	NaN	NaN	NaN	NaN
1960-07-15	23.3333	26.7222	20	17.5556	25.6111	3.27778	NaN	NaN	NaN	NaN	NaN	NaN	NaN	NaN	NaN
1960-07-16	24.1667	29.3889	19.3889	17.4444	22.7778	6.72222	NaN	NaN	NaN	NaN	NaN	NaN	NaN	NaN	NaN
1960-07-17	23.7778	27.2222	18.8889	17.6667	21.7222	8.88889	NaN	NaN	NaN	NaN	NaN	NaN	NaN	NaN	NaN
1960-07-18	22.6111	25.6111	18.2778	17.8889	22.7778	11.7222	NaN	NaN	NaN	NaN	NaN	NaN	NaN	NaN	NaN
1960-07-19	23.0556	26.1111	20	19.2222	27.2222	9.38889	NaN	NaN	NaN	NaN	NaN	NaN	NaN	NaN	NaN
1960-07-20	23.5	26.7222	18.8889	18.1111	22.7778	10.6111	NaN	NaN	NaN	NaN	NaN	NaN	NaN	NaN	NaN
1960-07-21	22.7778	26.7222	18.8889	19	23.2778	12.7778	NaN	NaN	NaN	NaN	NaN	NaN	NaN	NaN	NaN
1960-07-22	21.6667	26.7222	16.7222	16.7778	20	13.2778	NaN	NaN	NaN	NaN	NaN	NaN	NaN	NaN	NaN
1960-07-23	22.3889	26.7222	17.7778	15.4444	20.6111	8.27778	NaN	NaN	NaN	NaN	NaN	NaN	NaN	NaN	NaN
1960-07-24	23.5	29.3889	17.7778	16.5556	22.7778	6.72222	NaN	NaN	NaN	NaN	NaN	NaN	NaN	NaN	NaN
1960-07-25	22.6667	28.2778	16.7222	18.3333	25	7.22222	NaN	NaN	NaN	NaN	NaN	NaN	NaN	NaN	NaN
1960-07-26	22.5	28.2778	17.2222	17.7778	24.3889	9.38889	NaN	NaN	NaN	NaN	NaN	NaN	NaN	NaN	NaN
1960-07-27	23.3333	29.3889	17.7778	18.2222	22.7778	13.2778	NaN	NaN	NaN	NaN	NaN	NaN	NaN	NaN	NaN
1960-07-28	22.6111	27.7778	18.2778	17.2222	21.1111	12.7778	NaN	NaN	NaN	NaN	NaN	NaN	NaN	NaN	NaN
1960-07-29	22.5	27.2222	18.2778	18.1111	21.7222	13.2778	NaN	NaN	NaN	NaN	NaN	NaN	NaN	NaN	NaN
1960-07-30	22.8889	28.2778	18.2778	17.8889	23.2778	8.88889	NaN	NaN	NaN	NaN	NaN	NaN	NaN	NaN	NaN
1960-07-31	22.9444	27.2222	18.8889	19.3333	25.6111	12.2222	NaN	NaN	NaN	NaN	NaN	NaN	NaN	NaN	NaN
1960-08-01	23.0556	27.7778	19.3889	18.3333	24.3889	10.6111	NaN	NaN	NaN	NaN	NaN	NaN	NaN	NaN	NaN
1960-08-02	23.0556	28.2778	18.2778	18.7778	24.3889	11.7222	NaN	NaN	NaN	NaN	NaN	NaN	NaN	NaN	NaN
1960-08-03	22.9444	26.1111	18.2778	19	25.6111	11.7222	NaN	NaN	NaN	NaN	NaN	NaN	NaN	NaN	NaN
1960-08-04	23.0556	26.7222	19.3889	17	22.7778	11.7222	NaN	NaN	NaN	NaN	NaN	NaN	NaN	NaN	NaN
1960-08-05	22.7778	26.1111	18.8889	17.3333	24.3889	11.7222	NaN	NaN	NaN	NaN	NaN	NaN	NaN	NaN	NaN
1960-08-06	23.5	27.2222	20	18.6667	24.3889	12.7778	NaN	NaN	NaN	NaN	NaN	NaN	NaN	NaN	NaN
1960-08-07	24.4444	27.2222	21.1111	17.7778	23.8889	8.27778	NaN	NaN	NaN	NaN	NaN	NaN	NaN	NaN	NaN
1960-08-08	24.1667	26.7222	21.1111	18.8889	26.1111	10	NaN	NaN	NaN	NaN	NaN	NaN	NaN	NaN	NaN
1960-08-09	23.8889	26.7222	21.1111	18.2222	22.7778	12.7778	NaN	NaN	NaN	NaN	NaN	NaN	NaN	NaN	NaN
1960-08-10	23.5	27.7778	20	16.7778	22.7778	8.88889	NaN	NaN	NaN	NaN	NaN	NaN	NaN	NaN	NaN
1960-08-11	23.5	26.7222	20	17.8889	25	8.27778	NaN	NaN	NaN	NaN	NaN	NaN	NaN	NaN	NaN
1960-08-12	23.7778	27.2222	20	16.5556	22.7778	6.11111	NaN	NaN	NaN	NaN	NaN	NaN	NaN	NaN	NaN
1960-08-13	23.8889	27.7778	19.3889	17.1111	25.6111	6.72222	NaN	NaN	NaN	NaN	NaN	NaN	NaN	NaN	NaN
1960-08-14	23.5	27.2222	18.2778	18.4444	25	10	NaN	NaN	NaN	NaN	NaN	NaN	NaN	NaN	NaN
1960-08-15	22.8889	27.2222	18.2778	18.4444	26.7222	6.72222	NaN	NaN	NaN	NaN	NaN	NaN	NaN	NaN	NaN
1960-08-16	24.5556	27.2222	21.1111	17	23.2778	10.6111	NaN	NaN	NaN	NaN	NaN	NaN	NaN	NaN	NaN
1960-08-17	24	27.2222	18.8889	19.3333	24.3889	13.8889	NaN	NaN	NaN	NaN	NaN	NaN	NaN	NaN	NaN
1960-08-18	23.0556	26.1111	18.2778	17.6667	23.2778	13.2778	NaN	NaN	NaN	NaN	NaN	NaN	NaN	NaN	NaN
1960-08-19	23.6111	26.7222	19.3889	17.2222	22.7778	12.2222	NaN	NaN	NaN	NaN	NaN	NaN	NaN	NaN	NaN
1960-08-20	22.7778	26.7222	17.7778	16.6667	23.2778	7.77778	NaN	NaN	NaN	NaN	NaN	NaN	NaN	NaN	NaN
1960-08-21	23.3333	26.1111	20	17.1111	23.8889	8.27778	NaN	NaN	NaN	NaN	NaN	NaN	NaN	NaN	NaN
1960-08-22	24.0556	25.6111	21.7222	17.5556	25.6111	10.6111	NaN	NaN	NaN	NaN	NaN	NaN	NaN	NaN	NaN
1960-08-23	24.1667	27.7778	19.3889	17.6667	23.8889	8.27778	NaN	NaN	NaN	NaN	NaN	NaN	NaN	NaN	NaN
1960-08-24	23.6111	27.2222	19.3889	17.3333	23.2778	9.38889	NaN	NaN	NaN	NaN	NaN	NaN	NaN	NaN	NaN
1960-08-25	23.2222	25	20.6111	17.3333	21.1111	12.7778	NaN	NaN	NaN	NaN	NaN	NaN	NaN	NaN	NaN
1960-08-26	22.9444	25	20	17.5556	22.2222	12.2222	NaN	NaN	NaN	NaN	NaN	NaN	NaN	NaN	NaN
1960-08-27	22.3333	24.3889	19.3889	18.2222	22.2222	13.2778	NaN	NaN	NaN	NaN	NaN	NaN	NaN	NaN	NaN
1960-08-28	24.3333	26.7222	21.1111	18.6667	24.3889	13.2778	NaN	NaN	NaN	NaN	NaN	NaN	NaN	NaN	NaN
1960-08-29	22.5	25.6111	19.3889	17.4444	23.8889	12.2222	NaN	NaN	NaN	NaN	NaN	NaN	NaN	NaN	NaN
1960-08-30	22.9444	26.1111	18.2778	17	24.3889	9.38889	NaN	NaN	NaN	NaN	NaN	NaN	NaN	NaN	NaN
1960-08-31	24.4444	28.2778	19.3889	18.2222	25.6111	11.1111	NaN	NaN	NaN	NaN	NaN	NaN	NaN	NaN	NaN
1960-09-01	23.3333	26.7222	19.3889	16.8889	22.2222	8.27778	NaN	NaN	NaN	NaN	NaN	NaN	NaN	NaN	NaN
1960-09-02	23.8889	27.2222	18.8889	16.8889	23.8889	6.72222	NaN	NaN	NaN	NaN	NaN	NaN	NaN	NaN	NaN
1960-09-03	22.9444	25.6111	20	16.8889	24.3889	7.77778	NaN	NaN	NaN	NaN	NaN	NaN	NaN	NaN	NaN
1960-09-04	23.6111	26.7222	20.6111	17.3333	24.3889	10.6111	NaN	NaN	NaN	NaN	NaN	NaN	NaN	NaN	NaN
1960-09-05	24	26.7222	19.3889	17.3333	24.3889	8.27778	NaN	NaN	NaN	NaN	NaN	NaN	NaN	NaN	NaN
1960-09-06	22.3889	26.7222	18.8889	15.7778	21.1111	10	NaN	NaN	NaN	NaN	NaN	NaN	NaN	NaN	NaN
1960-09-07	23.7778	28.2778	20	17.3333	24.3889	8.27778	NaN	NaN	NaN	NaN	NaN	NaN	NaN	NaN	NaN
1960-09-08	23.7778	27.2222	18.8889	17.6667	25	7.77778	NaN	NaN	NaN	NaN	NaN	NaN	NaN	NaN	NaN
1960-09-09	23.6111	26.7222	18.8889	18	22.2222	12.7778	NaN	NaN	NaN	NaN	NaN	NaN	NaN	NaN	NaN
1960-09-10	24.1667	28.2778	18.2778	17.7778	24.3889	9.38889	NaN	NaN	NaN	NaN	NaN	NaN	NaN	NaN	NaN
1960-09-11	22.8889	26.1111	19.3889	17.4444	21.1111	12.7778	NaN	NaN	NaN	NaN	NaN	NaN	NaN	NaN	NaN
1960-09-12	23.5	26.7222	19.3889	17.6667	24.3889	10	NaN	NaN	NaN	NaN	NaN	NaN	NaN	NaN	NaN
1960-09-13	22.9444	27.2222	18.8889	18.4444	23.8889	13.2778	NaN	NaN	NaN	NaN	NaN	NaN	NaN	NaN	NaN
1960-09-14	22.9444	27.7778	18.2778	18	21.7222	11.1111	NaN	NaN	NaN	NaN	NaN	NaN	NaN	NaN	NaN
1960-09-15	24.4444	28.8889	20	17.3333	22.7778	6.72222	NaN	NaN	NaN	NaN	NaN	NaN	NaN	NaN	NaN
1960-09-16	23.6111	26.7222	18.8889	16.4444	23.8889	6.11111	NaN	NaN	NaN	NaN	NaN	NaN	NaN	NaN	NaN
1960-09-17	23.5	26.1111	20	15.7778	20.6111	11.7222	NaN	NaN	NaN	NaN	NaN	NaN	NaN	NaN	NaN
1960-09-18	23.8889	28.2778	19.3889	17.1111	21.1111	12.7778	NaN	NaN	NaN	NaN	NaN	NaN	NaN	NaN	NaN
1960-09-19	24.5556	30	19.3889	17.8889	22.7778	9.38889	NaN	NaN	NaN	NaN	NaN	NaN	NaN	NaN	NaN
1960-09-20	24.2778	27.2222	19.3889	18.5556	23.2778	12.7778	NaN	NaN	NaN	NaN	NaN	NaN	NaN	NaN	NaN
1960-09-21	24.6111	27.7778	20.6111	18.1111	25	7.77778	NaN	NaN	NaN	NaN	NaN	NaN	NaN	NaN	NaN
1960-09-22	24.4444	27.2222	20	18.6667	25.6111	8.88889	NaN	NaN	NaN	NaN	NaN	NaN	NaN	NaN	NaN
1960-09-23	24.7222	28.2778	20	17.9444	22.7778	12.7778	NaN	NaN	NaN	NaN	NaN	NaN	NaN	NaN	NaN
1960-09-24	25.3889	29.3889	20	19.2222	24.3889	11.7222	NaN	NaN	NaN	NaN	NaN	NaN	NaN	NaN	NaN
1960-09-25	24.8333	29.3889	20	19.2222	25.6111	9.38889	NaN	NaN	NaN	NaN	NaN	NaN	NaN	NaN	NaN
1960-09-26	24.8889	28.8889	20	17.6667	22.7778	6.72222	NaN	NaN	NaN	NaN	NaN	NaN	NaN	NaN	NaN
1960-09-27	25.5556	28.2778	21.7222	18.1111	25.6111	6.11111	NaN	NaN	NaN	NaN	NaN	NaN	NaN	NaN	NaN
1960-09-28	25	27.7778	20	19.1111	23.8889	11.1111	NaN	NaN	NaN	NaN	NaN	NaN	NaN	NaN	NaN
1960-09-29	23.0556	25.6111	20	19.3333	23.8889	13.2778	NaN	NaN	NaN	NaN	NaN	NaN	NaN	NaN	NaN
1960-09-30	22.1111	23.8889	20	18.4444	25.6111	9.38889	NaN	NaN	NaN	NaN	NaN	NaN	NaN	NaN	NaN
1960-10-01	22.9444	26.1111	18.8889	18.7778	22.2222	12.7778	NaN	NaN	NaN	NaN	NaN	NaN	NaN	NaN	NaN
1960-10-02	23.6111	25.6111	21.1111	17.5	23.2778	9.38889	NaN	NaN	NaN	NaN	NaN	NaN	NaN	NaN	NaN
1960-10-03	23.8889	27.7778	18.8889	19	24.3889	10	NaN	NaN	NaN	NaN	NaN	NaN	NaN	NaN	NaN
1960-10-04	25	27.7778	20	17.2222	23.2778	7.22222	NaN	NaN	NaN	NaN	NaN	NaN	NaN	NaN	NaN
1960-10-05	25.1667	27.7778	20.6111	17.7778	23.2778	7.77778	NaN	NaN	NaN	NaN	NaN	NaN	NaN	NaN	NaN
1960-10-06	24.3333	26.7222	20.6111	17.1111	23.2778	7.22222	NaN	NaN	NaN	NaN	NaN	NaN	NaN	NaN	NaN
1960-10-07	25	28.2778	21.7222	16.8889	22.7778	7.77778	NaN	NaN	NaN	NaN	NaN	NaN	NaN	NaN	NaN
1960-10-08	25.4444	28.8889	20.6111	18.4444	23.2778	10	NaN	NaN	NaN	NaN	NaN	NaN	NaN	NaN	NaN
1960-10-09	26.6667	30	22.2222	17.7778	25.6111	8.27778	NaN	NaN	NaN	NaN	NaN	NaN	NaN	NaN	NaN
1960-10-10	26.3889	30	21.7222	17.7778	25	6.72222	NaN	NaN	NaN	NaN	NaN	NaN	NaN	NaN	NaN
1960-10-11	25	29.3889	20	17.4444	23.2778	7.77778	NaN	NaN	NaN	NaN	NaN	NaN	NaN	NaN	NaN
1960-10-12	25.2778	27.7778	21.7222	17.8889	25	7.77778	NaN	NaN	NaN	NaN	NaN	NaN	NaN	NaN	NaN
1960-10-13	24	27.7778	20	19	22.7778	13.2778	NaN	NaN	NaN	NaN	NaN	NaN	NaN	NaN	NaN
1960-10-14	25	27.2222	21.1111	17.7778	25.6111	10	NaN	NaN	NaN	NaN	NaN	NaN	NaN	NaN	NaN
1960-10-15	25.8333	30	21.1111	16.8889	21.7222	7.22222	NaN	NaN	NaN	NaN	NaN	NaN	NaN	NaN	NaN
1960-10-16	24.8333	29.3889	20	18.4444	25	5	NaN	NaN	NaN	NaN	NaN	NaN	NaN	NaN	NaN
1960-10-17	25.4444	28.8889	21.7222	17.4444	23.8889	8.27778	NaN	NaN	NaN	NaN	NaN	NaN	NaN	NaN	NaN
1960-10-18	25.8333	30	21.1111	17.7778	24.3889	7.77778	NaN	NaN	NaN	NaN	NaN	NaN	NaN	NaN	NaN
1960-10-19	23.6111	26.1111	20	14.8889	22.2222	7.22222	NaN	NaN	NaN	NaN	NaN	NaN	NaN	NaN	NaN
1960-10-20	24.4444	28.8889	20	17.8889	25.6111	6.11111	NaN	NaN	NaN	NaN	NaN	NaN	NaN	NaN	NaN
1960-10-21	25.7778	29.3889	21.1111	18.1111	25	5.61111	NaN	NaN	NaN	NaN	NaN	NaN	NaN	NaN	NaN
1960-10-22	25.6667	28.2778	21.1111	19	25.6111	6.72222	NaN	NaN	NaN	NaN	NaN	NaN	NaN	NaN	NaN
1960-10-23	26.2778	29.3889	21.7222	19	24.3889	8.27778	NaN	NaN	NaN	NaN	NaN	NaN	NaN	NaN	NaN
1960-10-24	25	28.2778	20.6111	16.2222	18.2778	14.3889	NaN	NaN	NaN	NaN	NaN	NaN	NaN	NaN	NaN
1960-10-25	24.4444	28.2778	21.1111	15.5556	17.7778	13.2778	NaN	NaN	NaN	NaN	NaN	NaN	NaN	NaN	NaN
1960-10-26	23.6111	26.7222	21.1111	15.8889	19.3889	13.2778	NaN	NaN	NaN	NaN	NaN	NaN	NaN	NaN	NaN
1960-10-27	24.4444	28.8889	17.2222	16.5556	20	12.7778	NaN	NaN	NaN	NaN	NaN	NaN	NaN	NaN	NaN
1960-10-28	23.3333	27.2222	16.7222	16.1111	20.6111	7.77778	NaN	NaN	NaN	NaN	NaN	NaN	NaN	NaN	NaN
1960-10-29	25.1111	29.3889	19.3889	18.6667	23.2778	12.2222	NaN	NaN	NaN	NaN	NaN	NaN	NaN	NaN	NaN
1960-10-30	25.2778	29.3889	20.6111	18.5556	23.8889	10.6111	NaN	NaN	NaN	NaN	NaN	NaN	NaN	NaN	NaN
1960-10-31	25.4444	28.8889	22.2222	17.6667	19.3889	12.7778	NaN	NaN	NaN	NaN	NaN	NaN	NaN	NaN	NaN
1960-11-01	23.7778	27.2222	17.7778	17.2222	21.1111	11.1111	NaN	NaN	NaN	NaN	NaN	NaN	NaN	NaN	NaN
1960-11-02	21.9444	23.8889	20	16.8889	22.2222	11.1111	NaN	NaN	NaN	NaN	NaN	NaN	NaN	NaN	NaN
1960-11-03	23.6111	26.1111	20	16.4444	21.1111	7.77778	NaN	NaN	NaN	NaN	NaN	NaN	NaN	NaN	NaN
1960-11-04	23.3333	26.1111	20.6111	17.4444	22.2222	12.7778	NaN	NaN	NaN	NaN	NaN	NaN	NaN	NaN	NaN
1960-11-05	25.2222	28.2778	20	16.1111	21.7222	7.22222	NaN	NaN	NaN	NaN	NaN	NaN	NaN	NaN	NaN
1960-11-06	22.5	24.3889	20	16.6667	21.7222	9.38889	NaN	NaN	NaN	NaN	NaN	NaN	NaN	NaN	NaN
1960-11-07	23.5	25.6111	19.3889	19.4444	26.1111	8.27778	NaN	NaN	NaN	NaN	NaN	NaN	NaN	NaN	NaN
1960-11-08	23.7778	26.7222	18.8889	18.6667	26.1111	5.61111	NaN	NaN	NaN	NaN	NaN	NaN	NaN	NaN	NaN
1960-11-09	24.6111	27.2222	20.6111	18.2222	26.1111	5.61111	NaN	NaN	NaN	NaN	NaN	NaN	NaN	NaN	NaN
1960-11-10	23.3333	25.6111	19.3889	19.2222	23.2778	13.2778	NaN	NaN	NaN	NaN	NaN	NaN	NaN	NaN	NaN
1960-11-11	23.6111	26.7222	20	16.7778	22.7778	13.2778	NaN	NaN	NaN	NaN	NaN	NaN	NaN	NaN	NaN
1960-11-12	24.0556	26.7222	18.8889	19.2222	26.1111	11.7222	NaN	NaN	NaN	NaN	NaN	NaN	NaN	NaN	NaN
1960-11-13	23.5	25.6111	20	19.4444	24.3889	9.38889	NaN	NaN	NaN	NaN	NaN	NaN	NaN	NaN	NaN
1960-11-14	24.4444	27.7778	20	19	25	7.77778	NaN	NaN	NaN	NaN	NaN	NaN	NaN	NaN	NaN
1960-11-15	23.4444	27.2222	18.2778	18.6667	26.7222	8.88889	NaN	NaN	NaN	NaN	NaN	NaN	NaN	NaN	NaN
1960-11-16	23.0556	26.1111	18.2778	18	23.2778	10	NaN	NaN	NaN	NaN	NaN	NaN	NaN	NaN	NaN
1960-11-17	22.5	26.7222	17.7778	16.2222	18.8889	13.8889	NaN	NaN	NaN	NaN	NaN	NaN	NaN	NaN	NaN
1960-11-18	23.6111	27.2222	17.7778	16.5556	20.6111	8.88889	NaN	NaN	NaN	NaN	NaN	NaN	NaN	NaN	NaN
1960-11-19	24.7222	27.2222	21.7222	16.7778	22.2222	7.77778	NaN	NaN	NaN	NaN	NaN	NaN	NaN	NaN	NaN
1960-11-20	24	27.2222	20.6111	18.3333	26.1111	7.22222	NaN	NaN	NaN	NaN	NaN	NaN	NaN	NaN	NaN
1960-11-21	23.0556	25.6111	18.8889	18.7778	23.8889	11.1111	NaN	NaN	NaN	NaN	NaN	NaN	NaN	NaN	NaN
1960-11-22	23.6111	26.7222	17.7778	18.1111	22.7778	7.77778	NaN	NaN	NaN	NaN	NaN	NaN	NaN	NaN	NaN
1960-11-23	23.3333	25.6111	17.7778	16.5556	22.7778	6.11111	NaN	NaN	NaN	NaN	NaN	NaN	NaN	NaN	NaN
1960-11-24	24.4444	28.2778	18.8889	15.3333	22.7778	5.61111	NaN	NaN	NaN	NaN	NaN	NaN	NaN	NaN	NaN
1960-11-25	22.6667	26.1111	16.7222	16.1111	22.2222	5.61111	NaN	NaN	NaN	NaN	NaN	NaN	NaN	NaN	NaN
1960-11-26	23.7778	26.1111	20	17	24.3889	5.61111	NaN	NaN	NaN	NaN	NaN	NaN	NaN	NaN	NaN
1960-11-27	24	27.7778	17.7778	16.6667	22.7778	5.61111	NaN	NaN	NaN	NaN	NaN	NaN	NaN	NaN	NaN
1960-11-28	23.3333	28.2778	17.2222	18.1111	22.7778	7.22222	NaN	NaN	NaN	NaN	NaN	NaN	NaN	NaN	NaN
1960-11-29	24	28.2778	17.7778	17.7778	24.3889	6.72222	NaN	NaN	NaN	NaN	NaN	NaN	NaN	NaN	NaN
1960-11-30	25.1111	28.8889	19.3889	18.8889	26.1111	6.72222	NaN	NaN	NaN	NaN	NaN	NaN	NaN	NaN	NaN
1960-12-01	24.4444	27.7778	18.8889	18	24.3889	5.61111	NaN	NaN	NaN	NaN	NaN	NaN	NaN	NaN	NaN
1960-12-02	25.3889	29.3889	20.6111	17.3333	23.8889	6.72222	NaN	NaN	NaN	NaN	NaN	NaN	NaN	NaN	NaN
1960-12-03	24.2778	27.7778	17.2222	19.1111	26.7222	7.22222	NaN	NaN	NaN	NaN	NaN	NaN	NaN	NaN	NaN
1960-12-04	NaN	NaN	NaN	18.5556	25.6111	6.11111	NaN	NaN	NaN	NaN	NaN	NaN	NaN	NaN	NaN
1960-12-05	NaN	NaN	NaN	18.2222	23.2778	5.61111	NaN	NaN	NaN	NaN	NaN	NaN	NaN	NaN	NaN
1960-12-06	25.9444	29.3889	21.7222	16.1111	21.7222	6.72222	NaN	NaN	NaN	NaN	NaN	NaN	NaN	NaN	NaN
1960-12-07	25.7222	28.8889	21.7222	18.1111	25	6.11111	NaN	NaN	NaN	NaN	NaN	NaN	NaN	NaN	NaN
1960-12-08	25.8333	28.8889	22.2222	17.3333	22.2222	7.77778	NaN	NaN	NaN	NaN	NaN	NaN	NaN	NaN	NaN
1960-12-09	25.5556	28.8889	21.7222	19.4444	23.8889	11.7222	NaN	NaN	NaN	NaN	NaN	NaN	NaN	NaN	NaN
1960-12-10	25	27.2222	21.7222	18.7778	26.1111	6.72222	NaN	NaN	NaN	NaN	NaN	NaN	NaN	NaN	NaN
1960-12-11	NaN	NaN	NaN	19.1111	26.1111	6.11111	NaN	NaN	NaN	NaN	NaN	NaN	NaN	NaN	NaN
1960-12-12	NaN	NaN	NaN	19.2222	26.7222	5.61111	NaN	NaN	NaN	NaN	NaN	NaN	NaN	NaN	NaN
1960-12-13	24.7222	28.8889	18.8889	18.5556	23.8889	7.77778	NaN	NaN	NaN	NaN	NaN	NaN	NaN	NaN	NaN
1960-12-14	24.4444	28.2778	17.7778	17.9444	25.6111	7.22222	NaN	NaN	NaN	NaN	NaN	NaN	NaN	NaN	NaN
1960-12-15	25.8333	29.3889	21.7222	18.6667	23.2778	9.38889	NaN	NaN	NaN	NaN	NaN	NaN	NaN	NaN	NaN
1960-12-16	25.8333	28.8889	22.2222	16.7778	20.6111	10.6111	NaN	NaN	NaN	NaN	NaN	NaN	NaN	NaN	NaN
1960-12-17	25.2778	28.8889	21.7222	17.5556	23.2778	10.6111	NaN	NaN	NaN	NaN	NaN	NaN	NaN	NaN	NaN
1960-12-18	NaN	NaN	NaN	17.4444	23.2778	12.7778	NaN	NaN	NaN	NaN	NaN	NaN	NaN	NaN	NaN
1960-12-19	NaN	NaN	NaN	19	25.6111	13.2778	NaN	NaN	NaN	NaN	NaN	NaN	NaN	NaN	NaN
1960-12-20	20.8333	23.2778	18.8889	17.7778	21.7222	13.8889	NaN	NaN	NaN	NaN	NaN	NaN	NaN	NaN	NaN
1960-12-21	23.7778	27.2222	18.8889	18	25	10	NaN	NaN	NaN	NaN	NaN	NaN	NaN	NaN	NaN
1960-12-22	23.8889	27.2222	18.2778	18.4444	23.8889	7.77778	NaN	NaN	NaN	NaN	NaN	NaN	NaN	NaN	NaN
1960-12-23	24.7222	28.8889	18.2778	19.3333	25.6111	6.72222	NaN	NaN	NaN	NaN	NaN	NaN	NaN	NaN	NaN
1960-12-24	24.5556	28.2778	18.2778	19.1111	24.3889	8.27778	NaN	NaN	NaN	NaN	NaN	NaN	NaN	NaN	NaN
1960-12-25	NaN	NaN	NaN	19.2222	25	7.77778	NaN	NaN	NaN	NaN	NaN	NaN	NaN	NaN	NaN
1960-12-26	NaN	NaN	NaN	19.6667	23.8889	9.38889	NaN	NaN	NaN	NaN	NaN	NaN	NaN	NaN	NaN
1960-12-27	24.1667	28.2778	17.7778	19.1111	25	8.27778	NaN	NaN	NaN	NaN	NaN	NaN	NaN	NaN	NaN
1960-12-28	24.2778	28.2778	17.7778	18.1111	25	4.38889	NaN	NaN	NaN	NaN	NaN	NaN	NaN	NaN	NaN
1960-12-29	24.3333	27.7778	17.7778	19	25.6111	6.72222	NaN	NaN	NaN	NaN	NaN	NaN	NaN	NaN	NaN
1960-12-30	25	28.8889	20	18.6111	26.1111	6.11111	NaN	NaN	NaN	NaN	NaN	NaN	NaN	NaN	NaN
1960-12-31	24.2778	27.7778	17.7778	19.6667	27.2222	5.61111	NaN	NaN	NaN	NaN	NaN	NaN	NaN	NaN	NaN
1961-01-01	NaN	NaN	NaN	18.8889	26.1111	4.38889	NaN	NaN	NaN	NaN	NaN	NaN	20.2222	26.7222	6.72222
1961-01-02	NaN	NaN	NaN	NaN	NaN	NaN	NaN	NaN	NaN	NaN	NaN	NaN	NaN	NaN	NaN
1961-01-03	22.6111	27.2222	19.3889	NaN	NaN	NaN	NaN	NaN	NaN	NaN	NaN	NaN	NaN	NaN	NaN
1961-01-04	23.8889	28.2778	19.3889	19.1667	25.6111	5	NaN	NaN	NaN	NaN	NaN	NaN	21	28.2778	7.77778
1961-01-05	24.1667	28.8889	18.8889	19.4444	26.7222	5	NaN	NaN	NaN	NaN	NaN	NaN	20	27.7778	6.11111
1961-01-06	24.1667	28.2778	18.8889	19.4444	27.2222	6.11111	NaN	NaN	NaN	NaN	NaN	NaN	20.3333	27.7778	6.11111
1961-01-07	24.7222	28.2778	20	20	25.6111	7.22222	NaN	NaN	NaN	NaN	NaN	NaN	21.2222	26.1111	9.38889
1961-01-08	NaN	NaN	NaN	19	26.1111	7.22222	NaN	NaN	NaN	NaN	NaN	NaN	20.5556	26.1111	8.27778
1961-01-09	NaN	NaN	NaN	20.8889	27.7778	10	NaN	NaN	NaN	NaN	NaN	NaN	21.4444	27.7778	9.38889
1961-01-10	24.0556	27.7778	17.7778	19.2222	25.6111	6.11111	NaN	NaN	NaN	NaN	NaN	NaN	20.6667	27.2222	7.22222
1961-01-11	24.3333	28.8889	17.7778	20.1111	26.1111	10.6111	NaN	NaN	NaN	NaN	NaN	NaN	20.2222	27.2222	7.22222
1961-01-12	25	29.3889	18.2778	20.1111	26.7222	7.77778	NaN	NaN	NaN	NaN	NaN	NaN	19.4444	27.7778	5
1961-01-13	25.7778	29.3889	21.1111	19.7778	26.1111	8.27778	NaN	NaN	NaN	NaN	NaN	NaN	20.5556	28.2778	5.61111
1961-01-14	25.7222	29.3889	21.7222	18.6667	25.6111	5	NaN	NaN	NaN	NaN	NaN	NaN	20.7778	27.7778	6.72222
1961-01-15	NaN	NaN	NaN	20	27.2222	6.72222	NaN	NaN	NaN	NaN	NaN	NaN	20.3333	27.7778	5.61111
1961-01-16	NaN	NaN	NaN	20	27.2222	7.77778	NaN	NaN	NaN	NaN	NaN	NaN	20.4444	27.7778	5.61111
1961-01-17	27.1111	32.2222	21.7222	19.3333	25	9.38889	NaN	NaN	NaN	NaN	NaN	NaN	19.4444	26.1111	6.11111
1961-01-18	25.8333	29.3889	21.7222	18.2222	22.7778	7.22222	NaN	NaN	NaN	NaN	NaN	NaN	19.3333	25.6111	8.27778
1961-01-19	25.8333	29.3889	21.1111	17.7222	21.7222	10.6111	NaN	NaN	NaN	NaN	NaN	NaN	20.1111	26.7222	11.1111
1961-01-20	26.3333	29.3889	22.2222	21	27.7778	8.88889	NaN	NaN	NaN	NaN	NaN	NaN	20.8889	27.2222	7.22222
1961-01-21	25.5	28.2778	21.1111	20.2222	27.7778	6.72222	NaN	NaN	NaN	NaN	NaN	NaN	20.7778	27.7778	6.72222
1961-01-22	NaN	NaN	NaN	19.6667	26.7222	5	NaN	NaN	NaN	NaN	NaN	NaN	22	31.1111	7.22222
1961-01-23	NaN	NaN	NaN	19.7778	25.6111	7.22222	NaN	NaN	NaN	NaN	NaN	NaN	20.8889	25.6111	11.1111
1961-01-24	23.3333	26.1111	18.8889	21	28.2778	8.27778	NaN	NaN	NaN	NaN	NaN	NaN	21.7778	27.7778	10.6111
1961-01-25	24.3333	26.7222	21.7222	22.1111	27.7778	11.7222	NaN	NaN	NaN	NaN	NaN	NaN	21.7778	28.2778	10
1961-01-26	25.1667	28.8889	20.6111	22.4444	28.2778	10.6111	NaN	NaN	NaN	NaN	NaN	NaN	21.6667	27.7778	7.77778
1961-01-27	24.8889	28.2778	20.6111	21.3333	27.7778	8.88889	NaN	NaN	NaN	NaN	NaN	NaN	21.8889	30	7.77778
1961-01-28	24.8333	28.8889	19.3889	20	26.7222	5.61111	NaN	NaN	NaN	NaN	NaN	NaN	19.8889	26.7222	10
1961-01-29	NaN	NaN	NaN	20.2222	27.7778	6.72222	NaN	NaN	NaN	NaN	NaN	NaN	19.4444	25	8.27778
1961-01-30	NaN	NaN	NaN	20.4444	28.2778	4.38889	NaN	NaN	NaN	NaN	NaN	NaN	21.5556	28.8889	8.27778
1961-01-31	25.5556	28.8889	21.1111	21.6667	28.8889	8.27778	NaN	NaN	NaN	NaN	NaN	NaN	22.4444	29.3889	8.27778
1961-02-01	24.8889	27.7778	21.1111	20.5556	28.2778	5.61111	NaN	NaN	NaN	NaN	NaN	NaN	21.3333	28.8889	8.27778
1961-02-02	23.1667	27.2222	19.3889	19.7778	27.2222	6.72222	NaN	NaN	NaN	NaN	NaN	NaN	21.3333	27.2222	10.6111
1961-02-03	22.9444	25	18.8889	21.1111	26.7222	11.1111	NaN	NaN	NaN	NaN	NaN	NaN	20.2222	24.3889	9.38889
1961-02-04	23.3333	25.6111	20.6111	19.4444	23.2778	15	NaN	NaN	NaN	NaN	NaN	NaN	19.5556	25	12.7778
1961-02-05	NaN	NaN	NaN	18.3333	24.3889	10	NaN	NaN	NaN	NaN	NaN	NaN	16.2222	20.6111	12.2222
1961-02-06	NaN	NaN	NaN	17.7778	24.3889	7.77778	NaN	NaN	NaN	NaN	NaN	NaN	18	25	9.38889
1961-02-07	22.6667	26.7222	17.7778	17.2222	24.3889	7.77778	NaN	NaN	NaN	NaN	NaN	NaN	19.3333	24.3889	9.38889
1961-02-08	23.3333	27.7778	18.2778	18.6667	25	9.38889	NaN	NaN	NaN	NaN	NaN	NaN	19.8889	27.7778	10
1961-02-09	23.7778	26.1111	20.6111	21	27.2222	10.6111	NaN	NaN	NaN	NaN	NaN	NaN	20.8889	28.8889	7.22222
1961-02-10	22.7778	25	19.3889	20.1111	26.7222	6.72222	NaN	NaN	NaN	NaN	NaN	NaN	22	29.3889	8.27778
1961-02-11	22.9444	25	20.6111	18.5556	24.3889	5.61111	NaN	NaN	NaN	NaN	NaN	NaN	19.5556	23.8889	10
1961-02-12	NaN	NaN	NaN	20.2778	24.3889	12.2222	NaN	NaN	NaN	NaN	NaN	NaN	20.8889	25.6111	11.7222
1961-02-13	NaN	NaN	NaN	19.5556	26.7222	7.77778	NaN	NaN	NaN	NaN	NaN	NaN	19.2222	26.1111	8.27778
1961-02-14	21.6667	25	18.8889	20.1667	27.7778	7.77778	NaN	NaN	NaN	NaN	NaN	NaN	21.5556	27.7778	11.1111
1961-02-15	22.7222	26.1111	19.3889	20.7778	29.3889	5.61111	NaN	NaN	NaN	NaN	NaN	NaN	19.7778	27.2222	8.27778
1961-02-16	22.7778	25	18.8889	20.7778	26.7222	7.77778	NaN	NaN	NaN	NaN	NaN	NaN	20.7778	26.7222	9.38889
1961-02-17	23.1667	27.2222	19.3889	20.1667	27.7778	5.61111	NaN	NaN	NaN	NaN	NaN	NaN	18.4444	25.6111	10
1961-02-18	23.7778	27.2222	20.6111	19.6667	27.7778	5	NaN	NaN	NaN	NaN	NaN	NaN	20.1111	25.6111	10
1961-02-19	NaN	NaN	NaN	20.1111	28.2778	6.11111	NaN	NaN	NaN	NaN	NaN	NaN	20.2222	27.2222	8.88889
1961-02-20	NaN	NaN	NaN	22.3333	27.7778	12.7778	NaN	NaN	NaN	NaN	NaN	NaN	21.4444	28.2778	11.7222
1961-02-21	23.7778	27.2222	20	21	27.7778	7.77778	NaN	NaN	NaN	NaN	NaN	NaN	20.8889	27.7778	9.38889
1961-02-22	24.0556	26.7222	20.6111	21.1111	27.7778	8.27778	NaN	NaN	NaN	NaN	NaN	NaN	22	28.2778	11.1111
1961-02-23	23.8889	27.2222	21.1111	21.3333	27.2222	9.38889	NaN	NaN	NaN	NaN	NaN	NaN	21.5556	28.8889	7.22222
1961-02-24	24.5556	27.7778	20	21.1111	28.2778	7.77778	NaN	NaN	NaN	NaN	NaN	NaN	20.8889	27.7778	7.22222
1961-02-25	24.5556	27.2222	22.2222	20.2222	26.7222	8.27778	NaN	NaN	NaN	NaN	NaN	NaN	19.6667	26.7222	9.38889
1961-02-26	NaN	NaN	NaN	21.8889	28.8889	10	NaN	NaN	NaN	NaN	NaN	NaN	20.2222	27.2222	11.1111
1961-02-27	NaN	NaN	NaN	NaN	NaN	NaN	NaN	NaN	NaN	NaN	NaN	NaN	21.5556	27.7778	10.6111
1961-02-28	23.6111	26.7222	20.6111	NaN	NaN	NaN	NaN	NaN	NaN	NaN	NaN	NaN	22	27.2222	11.1111
1961-03-01	22.7778	26.7222	19.3889	22	29.3889	10	NaN	NaN	NaN	NaN	NaN	NaN	19.5556	26.7222	11.1111
1961-03-02	22.6667	26.1111	20.6111	20.5556	26.7222	10.6111	NaN	NaN	NaN	NaN	NaN	NaN	21	26.7222	11.7222
1961-03-03	24	27.7778	20	21.7778	28.8889	11.7222	NaN	NaN	NaN	NaN	NaN	NaN	20.8889	27.2222	12.2222
1961-03-04	23.8889	26.7222	18.8889	23.2222	28.2778	16.1111	NaN	NaN	NaN	NaN	NaN	NaN	20.5556	26.7222	7.22222
1961-03-05	NaN	NaN	NaN	20.8889	28.8889	7.22222	NaN	NaN	NaN	NaN	NaN	NaN	20.7778	28.8889	6.11111
1961-03-06	NaN	NaN	NaN	20.6667	27.2222	6.72222	NaN	NaN	NaN	NaN	NaN	NaN	20.6667	28.8889	6.11111
1961-03-07	25	27.7778	20	21.1111	28.8889	6.72222	NaN	NaN	NaN	NaN	NaN	NaN	21.3333	28.2778	7.77778
1961-03-08	25.2778	29.3889	19.3889	20.7778	28.2778	6.72222	NaN	NaN	NaN	NaN	NaN	NaN	21.2222	28.2778	6.72222
1961-03-09	24.3333	28.8889	17.7778	21.3333	28.8889	8.27778	NaN	NaN	NaN	NaN	NaN	NaN	20.4444	28.2778	6.11111
1961-03-10	24.8333	28.8889	18.8889	21.8889	28.2778	10	NaN	NaN	NaN	NaN	NaN	NaN	21.2222	28.2778	7.22222
1961-03-11	25.5	29.3889	19.3889	NaN	NaN	NaN	NaN	NaN	NaN	NaN	NaN	NaN	22.2222	29.3889	8.88889
1961-03-12	NaN	NaN	NaN	NaN	NaN	NaN	NaN	NaN	NaN	NaN	NaN	NaN	19.1667	26.7222	12.7778
1961-03-13	NaN	NaN	NaN	22.5556	27.2222	13.8889	NaN	NaN	NaN	NaN	NaN	NaN	18.4444	25.6111	12.7778
1961-03-14	23.8889	27.7778	20	21	26.7222	10	NaN	NaN	NaN	NaN	NaN	NaN	19.3333	27.2222	10.6111
1961-03-15	21.9444	26.1111	18.8889	20	24.3889	10.6111	NaN	NaN	NaN	NaN	NaN	NaN	19.4444	25.6111	10.6111
1961-03-16	22.8889	25	18.8889	20.6667	28.2778	10	NaN	NaN	NaN	NaN	NaN	NaN	20.7778	27.2222	10
1961-03-17	24.4444	27.7778	19.3889	20.4444	26.7222	8.88889	NaN	NaN	NaN	NaN	NaN	NaN	21.5556	28.2778	10
1961-03-18	25.2778	28.8889	20	20.7778	29.3889	7.22222	NaN	NaN	NaN	NaN	NaN	NaN	22.1111	28.8889	8.88889
1961-03-19	NaN	NaN	NaN	20.3333	25.6111	8.88889	NaN	NaN	NaN	NaN	NaN	NaN	22	27.7778	10
1961-03-20	NaN	NaN	NaN	18.8889	25	9.38889	NaN	NaN	NaN	NaN	NaN	NaN	20.4444	26.1111	10
1961-03-21	21.9444	25	18.2778	18.1111	24.3889	13.2778	NaN	NaN	NaN	NaN	NaN	NaN	20.7778	27.7778	12.7778
1961-03-22	23.3333	28.8889	17.7778	20.6667	27.2222	14.3889	NaN	NaN	NaN	NaN	NaN	NaN	20	26.1111	12.2222
1961-03-23	24.4444	29.3889	18.8889	17.6667	25	7.77778	NaN	NaN	NaN	NaN	NaN	NaN	20.4444	25.6111	9.38889
1961-03-24	23.4444	26.1111	19.3889	18.1111	24.3889	9.38889	NaN	NaN	NaN	NaN	NaN	NaN	21.4444	27.7778	10.6111
1961-03-25	23.3333	25	20.6111	20.3333	26.7222	8.88889	NaN	NaN	NaN	NaN	NaN	NaN	21.1111	28.2778	7.77778
1961-03-26	NaN	NaN	NaN	22.7778	28.2778	15	NaN	NaN	NaN	NaN	NaN	NaN	22	28.2778	10.6111
1961-03-27	NaN	NaN	NaN	21.4444	28.8889	10	NaN	NaN	NaN	NaN	NaN	NaN	20.2222	27.7778	11.7222
1961-03-28	25.2778	28.8889	20.6111	19.8889	25.6111	10.6111	NaN	NaN	NaN	NaN	NaN	NaN	21.8889	28.2778	10.6111
1961-03-29	23.8889	26.7222	20	21.2222	26.7222	12.2222	NaN	NaN	NaN	NaN	NaN	NaN	22.7778	27.7778	15.6111
1961-03-30	24.5556	27.7778	20	21.1111	27.2222	11.1111	NaN	NaN	NaN	NaN	NaN	NaN	23	28.2778	15.6111
1961-03-31	23.0556	25.6111	20	21.3333	27.7778	9.38889	NaN	NaN	NaN	NaN	NaN	NaN	21.8889	27.7778	10
1961-04-01	23.6111	26.7222	19.3889	21.8889	27.7778	10	NaN	NaN	NaN	NaN	NaN	NaN	22.8889	28.2778	14.3889
1961-04-02	NaN	NaN	NaN	21.7778	27.2222	13.2778	NaN	NaN	NaN	NaN	NaN	NaN	22.1111	28.2778	12.7778
1961-04-03	NaN	NaN	NaN	21.3333	28.2778	10	NaN	NaN	NaN	NaN	NaN	NaN	21.7778	28.8889	9.38889
1961-04-04	24.5556	27.7778	19.3889	20.8889	26.7222	8.88889	NaN	NaN	NaN	NaN	NaN	NaN	22.3333	28.8889	9.38889
1961-04-05	24.0556	26.7222	20	20.8889	26.7222	12.2222	NaN	NaN	NaN	NaN	NaN	NaN	20.4444	25.6111	11.1111
1961-04-06	23.2222	26.7222	20	17.8889	20.6111	13.8889	NaN	NaN	NaN	NaN	NaN	NaN	17.7778	22.7778	10.6111
1961-04-07	23	26.1111	19.3889	18.7778	22.7778	14.3889	NaN	NaN	NaN	NaN	NaN	NaN	20.2222	26.7222	12.7778
1961-04-08	20.2778	21.1111	19.3889	19.8889	25.6111	15	NaN	NaN	NaN	NaN	NaN	NaN	19.5556	23.8889	15
1961-04-09	NaN	NaN	NaN	19.2222	25	14.3889	NaN	NaN	NaN	NaN	NaN	NaN	19.4444	22.7778	15
1961-04-10	NaN	NaN	NaN	17.1111	22.7778	12.2222	NaN	NaN	NaN	NaN	NaN	NaN	18.8889	25	11.1111
1961-04-11	21.7778	25	18.2778	17.4444	19.3889	14.3889	NaN	NaN	NaN	NaN	NaN	NaN	17.5556	21.7222	11.1111
1961-04-12	22.3889	25.6111	17.2222	19	23.8889	11.1111	NaN	NaN	NaN	NaN	NaN	NaN	19.7778	25	11.1111
1961-04-13	24.1667	27.2222	19.3889	19.5556	26.7222	10	NaN	NaN	NaN	NaN	NaN	NaN	21.1111	26.7222	11.1111
1961-04-14	24.8889	28.8889	21.1111	19.5556	24.3889	14.3889	NaN	NaN	NaN	NaN	NaN	NaN	20.1111	26.7222	11.1111
1961-04-15	24.7222	27.7778	20.6111	19.8889	27.2222	10	NaN	NaN	NaN	NaN	NaN	NaN	20.3333	27.2222	8.88889
1961-04-16	NaN	NaN	NaN	19.3333	26.1111	8.27778	NaN	NaN	NaN	NaN	NaN	NaN	20.3333	27.7778	10
1961-04-17	NaN	NaN	NaN	19.5556	25	11.7222	NaN	NaN	NaN	NaN	NaN	NaN	18.6667	25.6111	12.2222
1961-04-18	23.1667	27.2222	18.8889	17.5556	23.2778	11.1111	NaN	NaN	NaN	NaN	NaN	NaN	17.1667	20.6111	12.7778
1961-04-19	23.3333	27.2222	17.7778	17.4444	25.6111	10.6111	NaN	NaN	NaN	NaN	NaN	NaN	20	25	10
1961-04-20	24.8333	27.2222	21.1111	17.6667	22.7778	11.1111	NaN	NaN	NaN	NaN	NaN	NaN	20	25	12.2222
1961-04-21	22.5	25	19.3889	17.1111	19.3889	11.7222	NaN	NaN	NaN	NaN	NaN	NaN	19.4444	23.8889	11.1111
1961-04-22	24	28.8889	19.3889	17.6667	21.7222	12.2222	NaN	NaN	NaN	NaN	NaN	NaN	19.1111	25	6.11111
1961-04-23	NaN	NaN	NaN	18.4444	26.7222	7.77778	NaN	NaN	NaN	NaN	NaN	NaN	19.7778	26.7222	6.72222
1961-04-24	NaN	NaN	NaN	20.1111	26.7222	11.1111	NaN	NaN	NaN	NaN	NaN	NaN	19.8889	25.6111	8.27778
1961-04-25	24.7222	28.2778	20.6111	19.8889	25.6111	9.38889	NaN	NaN	NaN	NaN	NaN	NaN	20.2222	26.7222	8.27778
1961-04-26	24.2778	27.7778	19.3889	19.2222	23.8889	8.27778	NaN	NaN	NaN	NaN	NaN	NaN	19.5556	23.8889	9.38889
1961-04-27	24.4444	27.7778	19.3889	19	23.8889	9.38889	NaN	NaN	NaN	NaN	NaN	NaN	21.2222	26.1111	13.2778
1961-04-28	25	27.7778	20.6111	18.7778	25	8.88889	NaN	NaN	NaN	NaN	NaN	NaN	20.5556	25.6111	10.6111
1961-04-29	25	27.7778	20.6111	18.1667	25.6111	7.77778	NaN	NaN	NaN	NaN	NaN	NaN	20.3333	26.7222	9.38889
1961-04-30	NaN	NaN	NaN	18.6667	22.7778	14.3889	NaN	NaN	NaN	NaN	NaN	NaN	18.8889	25	15
1961-05-01	NaN	NaN	NaN	18.6667	22.7778	15	NaN	NaN	NaN	NaN	NaN	NaN	19.7778	23.8889	15.6111
1961-05-02	24.4444	27.7778	19.3889	18.4444	23.2778	15	NaN	NaN	NaN	NaN	NaN	NaN	19.7778	24.3889	12.7778
1961-05-03	23.6111	25	21.7222	18.6667	23.2778	11.7222	NaN	NaN	NaN	NaN	NaN	NaN	20.3333	23.8889	15.6111
1961-05-04	24.2222	26.7222	21.7222	18.8889	23.2778	14.3889	NaN	NaN	NaN	NaN	NaN	NaN	19.1111	23.2778	11.7222
1961-05-05	23.3333	26.7222	18.8889	18.8889	25	10.6111	NaN	NaN	NaN	NaN	NaN	NaN	20	23.8889	15
1961-05-06	23.0556	24.3889	20.6111	18.5556	22.7778	14.3889	NaN	NaN	NaN	NaN	NaN	NaN	18.3333	23.8889	11.1111
1961-05-07	NaN	NaN	NaN	17	23.2778	10	NaN	NaN	NaN	NaN	NaN	NaN	17.8889	21.1111	13.2778
1961-05-08	NaN	NaN	NaN	17.7778	24.3889	10	NaN	NaN	NaN	NaN	NaN	NaN	18.4444	21.7222	13.2778
1961-05-09	24	27.7778	19.3889	16.6667	22.2222	10.6111	NaN	NaN	NaN	NaN	NaN	NaN	19	23.8889	10.6111
1961-05-10	23.7778	27.2222	19.3889	18.2222	22.7778	11.7222	NaN	NaN	NaN	NaN	NaN	NaN	19.5556	24.3889	11.7222
1961-05-11	22.7222	24.3889	20	19.4444	25	12.7778	NaN	NaN	NaN	NaN	NaN	NaN	20.1111	23.2778	16.1111
1961-05-12	22.6667	26.1111	18.2778	19.6667	25	14.3889	NaN	NaN	NaN	NaN	NaN	NaN	19.5556	22.7778	15.6111
1961-05-13	22.5	27.2222	18.8889	18.8889	22.7778	13.2778	NaN	NaN	NaN	NaN	NaN	NaN	18.8889	22.2222	14.3889
1961-05-14	NaN	NaN	NaN	19.4444	25	10	NaN	NaN	NaN	NaN	NaN	NaN	20.3333	25	13.8889
1961-05-15	NaN	NaN	NaN	19.5556	26.7222	8.27778	NaN	NaN	NaN	NaN	NaN	NaN	20.1111	26.1111	9.38889
1961-05-16	24.8889	28.8889	20.6111	19	27.2222	7.22222	NaN	NaN	NaN	NaN	NaN	NaN	18.4444	23.2778	8.27778
1961-05-17	24.0556	27.7778	18.8889	19.1111	26.1111	8.27778	NaN	NaN	NaN	NaN	NaN	NaN	18.1111	23.2778	7.77778
1961-05-18	24.4444	28.2778	19.3889	18.8889	26.7222	7.22222	NaN	NaN	NaN	NaN	NaN	NaN	19.1111	25	7.77778
1961-05-19	24.7222	28.8889	19.3889	19.1111	26.7222	6.72222	NaN	NaN	NaN	NaN	NaN	NaN	18.7778	23.8889	7.77778
1961-05-20	25	27.7778	20.6111	18.4444	26.1111	7.77778	NaN	NaN	NaN	NaN	NaN	NaN	19.2222	23.8889	8.88889
1961-05-21	NaN	NaN	NaN	17.6667	23.8889	8.27778	NaN	NaN	NaN	NaN	NaN	NaN	19.1111	24.3889	8.88889
1961-05-22	NaN	NaN	NaN	19.2222	25.6111	7.77778	NaN	NaN	NaN	NaN	NaN	NaN	19.4444	24.3889	9.38889
1961-05-23	24.2778	27.2222	20	19.6667	25	7.22222	NaN	NaN	NaN	NaN	NaN	NaN	20.2222	25.6111	8.27778
1961-05-24	24.7222	27.7778	21.1111	18.6667	26.7222	8.27778	NaN	NaN	NaN	NaN	NaN	NaN	19.1111	23.8889	10.6111
1961-05-25	24.5556	27.2222	20.6111	19.8889	26.1111	13.8889	NaN	NaN	NaN	NaN	NaN	NaN	17	21.7222	11.7222
1961-05-26	24.7222	27.2222	21.7222	18.4444	24.3889	7.77778	NaN	NaN	NaN	NaN	NaN	NaN	17.8889	22.7778	9.38889
1961-05-27	23.7778	26.7222	20	17.6667	24.3889	8.27778	NaN	NaN	NaN	NaN	NaN	NaN	16.4444	22.2222	7.77778
1961-05-28	NaN	NaN	NaN	18.1111	26.7222	6.72222	NaN	NaN	NaN	NaN	NaN	NaN	18.6667	24.3889	8.27778
1961-05-29	NaN	NaN	NaN	18.8889	25	8.27778	NaN	NaN	NaN	NaN	NaN	NaN	19.1111	23.8889	11.1111
1961-05-30	25.1111	29.3889	21.1111	18.2222	26.1111	6.72222	NaN	NaN	NaN	NaN	NaN	NaN	18.5556	24.3889	8.27778
1961-05-31	23.7778	27.2222	20	17.4444	25	7.77778	NaN	NaN	NaN	NaN	NaN	NaN	18.1111	23.8889	7.77778
1961-06-01	23.6111	27.7778	20	17.6667	25.6111	7.77778	NaN	NaN	NaN	NaN	NaN	NaN	19.1667	22.7778	13.8889
1961-06-02	23.5	26.7222	19.3889	17.4444	24.3889	8.27778	NaN	NaN	NaN	NaN	NaN	NaN	18.5556	23.2778	11.1111
1961-06-03	24.2778	28.8889	20	17.6667	26.1111	5.61111	NaN	NaN	NaN	NaN	NaN	NaN	19.1111	25	7.22222
1961-06-04	NaN	NaN	NaN	17.7778	26.7222	6.72222	NaN	NaN	NaN	NaN	NaN	NaN	19.1111	24.3889	8.27778
1961-06-05	NaN	NaN	NaN	19.8889	27.7778	7.22222	NaN	NaN	NaN	NaN	NaN	NaN	19.5556	26.1111	8.88889
1961-06-06	24.5556	27.7778	20	20.5556	26.1111	12.2222	NaN	NaN	NaN	NaN	NaN	NaN	18.3333	23.8889	11.7222
1961-06-07	23.3333	26.7222	20	18.3333	24.3889	9.38889	NaN	NaN	NaN	NaN	NaN	NaN	19.6667	23.8889	14.3889
1961-06-08	23.6111	26.7222	18.8889	19.4444	26.1111	10.6111	NaN	NaN	NaN	NaN	NaN	NaN	17.7778	24.3889	12.2222
1961-06-09	23.5	26.7222	17.7778	19.5556	26.1111	8.88889	NaN	NaN	NaN	NaN	NaN	NaN	19.4444	26.1111	11.1111
1961-06-10	22.9444	26.1111	20	19.4444	26.1111	9.38889	NaN	NaN	NaN	NaN	NaN	NaN	18.4444	23.8889	12.2222
1961-06-11	NaN	NaN	NaN	20.3333	25.6111	14.3889	NaN	NaN	NaN	NaN	NaN	NaN	19.7778	23.8889	13.8889
1961-06-12	NaN	NaN	NaN	18.5556	23.2778	10.6111	NaN	NaN	NaN	NaN	NaN	NaN	18.8889	22.7778	12.7778
1961-06-13	22.9444	27.2222	18.2778	18.4444	23.2778	8.27778	NaN	NaN	NaN	NaN	NaN	NaN	18.2222	23.2778	8.27778
1961-06-14	23.0556	27.7778	17.2222	18.2222	23.8889	7.77778	NaN	NaN	NaN	NaN	NaN	NaN	16.8889	21.7222	8.27778
1961-06-15	22.5	27.7778	16.1111	17.7778	24.3889	5	NaN	NaN	NaN	NaN	NaN	NaN	17.3333	22.2222	7.77778
1961-06-16	24.3333	28.8889	20	18.1111	23.2778	6.72222	NaN	NaN	NaN	NaN	NaN	NaN	17.4444	22.7778	4.38889
1961-06-17	22.7778	27.2222	16.1111	16	21.7222	6.11111	NaN	NaN	NaN	NaN	NaN	NaN	17	21.7222	6.11111
1961-06-18	NaN	NaN	NaN	18.2222	23.8889	8.88889	NaN	NaN	NaN	NaN	NaN	NaN	17.3333	21.7222	10
1961-06-19	NaN	NaN	NaN	19.1667	25.6111	8.88889	NaN	NaN	NaN	NaN	NaN	NaN	17.8889	22.2222	12.7778
1961-06-20	23.8889	30	16.1111	19.2222	25	10.6111	NaN	NaN	NaN	NaN	NaN	NaN	19	22.2222	12.2222
1961-06-21	22.5	26.7222	16.7222	19.4444	25.6111	7.22222	NaN	NaN	NaN	NaN	NaN	NaN	18.4444	23.8889	6.72222
1961-06-22	23.5	26.7222	18.8889	17.5556	23.8889	6.11111	NaN	NaN	NaN	NaN	NaN	NaN	18.4444	24.3889	6.72222
1961-06-23	23.7778	26.7222	19.3889	18.7778	25.6111	11.7222	NaN	NaN	NaN	NaN	NaN	NaN	18	23.8889	7.77778
1961-06-24	23.3333	27.2222	17.7778	19.3333	25	8.88889	NaN	NaN	NaN	NaN	NaN	NaN	18.4444	23.2778	12.7778
1961-06-25	NaN	NaN	NaN	18.4444	23.2778	11.7222	NaN	NaN	NaN	NaN	NaN	NaN	17.4444	22.7778	8.27778
1961-06-26	NaN	NaN	NaN	16.5556	19.3889	13.8889	NaN	NaN	NaN	NaN	NaN	NaN	17.4444	20	13.8889
1961-06-27	23.8889	26.7222	20	17.8889	22.7778	7.77778	NaN	NaN	NaN	NaN	NaN	NaN	17.1111	22.7778	7.22222
1961-06-28	22.7778	25.6111	18.8889	18.6667	22.2222	12.2222	NaN	NaN	NaN	NaN	NaN	NaN	18.8889	22.7778	10.6111
1961-06-29	22.2778	23.8889	20.6111	18.1111	23.2778	10.6111	NaN	NaN	NaN	NaN	NaN	NaN	17.6667	22.2222	9.38889
1961-06-30	22.7778	25.6111	19.3889	18.3333	21.1111	15	NaN	NaN	NaN	NaN	NaN	NaN	17.3333	20.6111	14.3889
1961-07-01	22.7778	25.6111	20	19	23.2778	13.8889	NaN	NaN	NaN	NaN	NaN	NaN	16.8889	21.1111	13.2778
1961-07-02	NaN	NaN	NaN	16.6667	22.2222	7.77778	NaN	NaN	NaN	NaN	NaN	NaN	16.6667	21.7222	5
1961-07-03	NaN	NaN	NaN	19.3333	24.3889	8.88889	NaN	NaN	NaN	NaN	NaN	NaN	19	22.7778	13.8889
1961-07-04	23.0556	26.7222	18.2778	18.6667	24.3889	7.22222	NaN	NaN	NaN	NaN	NaN	NaN	17.5556	22.2222	7.77778
1961-07-05	22.7778	27.7778	16.7222	18.4444	24.3889	7.77778	NaN	NaN	NaN	NaN	NaN	NaN	16.8889	22.7778	5
1961-07-06	22	25.6111	15.6111	16.8889	23.8889	7.22222	NaN	NaN	NaN	NaN	NaN	NaN	16.1667	21.7222	5.61111
1961-07-07	21.8333	25.6111	16.1111	17.1111	21.7222	12.7778	NaN	NaN	NaN	NaN	NaN	NaN	17.1111	21.1111	10
1961-07-08	21.9444	23.8889	17.7778	15.1111	20.6111	8.88889	NaN	NaN	NaN	NaN	NaN	NaN	16.1111	20.6111	7.77778
1961-07-09	NaN	NaN	NaN	19.8889	25	13.2778	NaN	NaN	NaN	NaN	NaN	NaN	19.6667	23.8889	13.8889
1961-07-10	NaN	NaN	NaN	18.5556	23.8889	7.77778	NaN	NaN	NaN	NaN	NaN	NaN	19	22.7778	13.8889
1961-07-11	22.9444	26.7222	17.7778	19.1111	25	9.38889	NaN	NaN	NaN	NaN	NaN	NaN	18.2222	22.7778	11.1111
1961-07-12	23.3333	27.7778	17.2222	17.4444	23.8889	5.61111	NaN	NaN	NaN	NaN	NaN	NaN	16.3333	22.7778	4.38889
1961-07-13	23.6111	26.7222	20	15.7778	21.7222	8.88889	NaN	NaN	NaN	NaN	NaN	NaN	18.3333	22.2222	12.7778
1961-07-14	23.0556	27.2222	17.2222	18.3333	24.3889	8.27778	NaN	NaN	NaN	NaN	NaN	NaN	18.4444	22.7778	12.2222
1961-07-15	23.2222	26.1111	18.8889	18	25	8.27778	NaN	NaN	NaN	NaN	NaN	NaN	16.8889	22.7778	5.61111
1961-07-16	NaN	NaN	NaN	18.1111	24.3889	6.72222	NaN	NaN	NaN	NaN	NaN	NaN	18.1111	23.2778	10.6111
1961-07-17	NaN	NaN	NaN	18.2222	22.7778	10.6111	NaN	NaN	NaN	NaN	NaN	NaN	19.2222	22.7778	14.3889
1961-07-18	22.9444	26.1111	17.7778	18.3333	25.6111	6.72222	NaN	NaN	NaN	NaN	NaN	NaN	17.4444	22.7778	7.22222
1961-07-19	22.2222	25.6111	18.2778	18.8889	23.2778	12.7778	NaN	NaN	NaN	NaN	NaN	NaN	16	20	12.7778
1961-07-20	23.2222	26.7222	17.7778	19.2222	24.3889	11.1111	NaN	NaN	NaN	NaN	NaN	NaN	17.5556	21.1111	12.7778
1961-07-21	22.7778	27.2222	16.7222	18.4444	24.3889	8.27778	NaN	NaN	NaN	NaN	NaN	NaN	17.2222	21.7222	13.8889
1961-07-22	22.2778	25.6111	17.7778	18.7778	24.3889	11.1111	NaN	NaN	NaN	NaN	NaN	NaN	18	22.7778	12.7778
1961-07-23	NaN	NaN	NaN	18.7778	26.1111	13.8889	NaN	NaN	NaN	NaN	NaN	NaN	17.6667	22.7778	8.88889
1961-07-24	NaN	NaN	NaN	16.6667	22.2222	10.6111	NaN	NaN	NaN	NaN	NaN	NaN	17.7222	21.7222	10.6111
1961-07-25	22.0556	24.3889	18.8889	16.1111	18.2778	13.2778	NaN	NaN	NaN	NaN	NaN	NaN	15.7778	18.2778	13.2778
1961-07-26	22.2222	24.3889	19.3889	17.6667	20.6111	12.7778	NaN	NaN	NaN	NaN	NaN	NaN	17.5556	22.2222	12.7778
1961-07-27	21.9444	23.2778	20.6111	18	24.3889	10.6111	NaN	NaN	NaN	NaN	NaN	NaN	19.2222	24.3889	11.7222
1961-07-28	23.2222	25.6111	20	19.1111	24.3889	12.7778	NaN	NaN	NaN	NaN	NaN	NaN	19	23.8889	11.1111
1961-07-29	23.2222	26.1111	19.3889	19	23.8889	11.1111	NaN	NaN	NaN	NaN	NaN	NaN	18.7778	22.7778	14.3889
1961-07-30	NaN	NaN	NaN	18.4444	22.7778	10.6111	NaN	NaN	NaN	NaN	NaN	NaN	18.2222	23.2778	11.1111
1961-07-31	NaN	NaN	NaN	17.7778	25	7.77778	NaN	NaN	NaN	NaN	NaN	NaN	17.8889	23.2778	7.77778
1961-08-01	22.5	25	17.7778	18.3333	22.2222	13.2778	NaN	NaN	NaN	NaN	NaN	NaN	18	21.7222	12.7778
1961-08-02	21	23.2778	18.8889	16.5556	18.2778	13.2778	NaN	NaN	NaN	NaN	NaN	NaN	16.7778	20.6111	8.27778
1961-08-03	22.7778	25.6111	17.7778	15.4444	21.7222	7.77778	NaN	NaN	NaN	NaN	NaN	NaN	17.3333	22.2222	7.77778
1961-08-04	22.7778	25.6111	17.7778	17.7778	22.2222	13.8889	NaN	NaN	NaN	NaN	NaN	NaN	19	23.8889	12.7778
1961-08-05	22.3889	23.2778	20.6111	17.1111	20.6111	13.2778	NaN	NaN	NaN	NaN	NaN	NaN	18.5556	22.2222	14.3889
1961-08-06	NaN	NaN	NaN	15.0556	18.2778	13.2778	NaN	NaN	NaN	NaN	NaN	NaN	17.6667	22.7778	13.8889
1961-08-07	NaN	NaN	NaN	17.3333	22.2222	12.2222	NaN	NaN	NaN	NaN	NaN	NaN	17.8889	22.7778	10
1961-08-08	21.2222	23.2778	20	16.6667	18.8889	13.2778	NaN	NaN	NaN	NaN	NaN	NaN	17.1111	20.6111	13.2778
1961-08-09	21.1111	24.3889	17.7778	18	22.2222	14.3889	NaN	NaN	NaN	NaN	NaN	NaN	17.2222	20.6111	13.8889
1961-08-10	22.6667	25.6111	18.2778	16.2222	18.2778	13.2778	NaN	NaN	NaN	NaN	NaN	NaN	15.8889	19.3889	13.2778
1961-08-11	22.7778	25.6111	18.8889	16.2222	19.3889	13.2778	NaN	NaN	NaN	NaN	NaN	NaN	15	18.2778	12.7778
1961-08-12	23.5	26.1111	20.6111	16.8889	20.6111	12.2222	NaN	NaN	NaN	NaN	NaN	NaN	16.1111	21.7222	5.61111
1961-08-13	NaN	NaN	NaN	16.5556	22.7778	8.88889	NaN	NaN	NaN	NaN	NaN	NaN	17.2222	20.6111	11.7222
1961-08-14	NaN	NaN	NaN	16.8889	22.7778	11.1111	NaN	NaN	NaN	NaN	NaN	NaN	16.0556	19.3889	10
1961-08-15	21.6667	23.2778	19.3889	16.7778	21.7222	13.2778	NaN	NaN	NaN	NaN	NaN	NaN	17.4444	19.3889	13.2778
1961-08-16	22.7778	26.1111	17.2222	18	22.7778	12.2222	NaN	NaN	NaN	NaN	NaN	NaN	17.8889	21.1111	14.3889
1961-08-17	23.3333	26.7222	18.8889	16.7778	21.7222	11.1111	NaN	NaN	NaN	NaN	NaN	NaN	17.4444	20.6111	13.8889
1961-08-18	22.6667	25.6111	17.7778	16.7778	18.8889	13.2778	NaN	NaN	NaN	NaN	NaN	NaN	16.8889	20	13.2778
1961-08-19	22.6667	26.1111	17.2222	17.3889	20.6111	12.2222	NaN	NaN	NaN	NaN	NaN	NaN	17.3333	21.7222	11.7222
1961-08-20	NaN	NaN	NaN	17.8889	21.1111	13.2778	NaN	NaN	NaN	NaN	NaN	NaN	17.2222	21.1111	13.2778
1961-08-21	NaN	NaN	NaN	17.4444	19.3889	13.2778	NaN	NaN	NaN	NaN	NaN	NaN	17.2222	21.1111	13.8889
1961-08-22	23.6111	26.1111	20.6111	18.5556	22.7778	11.7222	NaN	NaN	NaN	NaN	NaN	NaN	18.3333	22.2222	11.1111
1961-08-23	23.3333	26.1111	18.2778	17.2222	22.7778	11.7222	NaN	NaN	NaN	NaN	NaN	NaN	17.7778	21.7222	11.1111
1961-08-24	24.3333	27.7778	20.6111	18.2222	22.2222	13.2778	NaN	NaN	NaN	NaN	NaN	NaN	17.1111	20	13.8889
1961-08-25	23.2222	26.7222	17.7778	18.3333	22.7778	11.7222	NaN	NaN	NaN	NaN	NaN	NaN	16.4444	23.2778	6.72222
1961-08-26	23.0556	27.2222	16.7222	17.8889	22.7778	9.38889	NaN	NaN	NaN	NaN	NaN	NaN	17.3333	22.2222	9.38889
1961-08-27	NaN	NaN	NaN	18	23.8889	10	NaN	NaN	NaN	NaN	NaN	NaN	17.1667	22.2222	6.72222
1961-08-28	NaN	NaN	NaN	18.4444	21.7222	13.2778	NaN	NaN	NaN	NaN	NaN	NaN	18.5556	22.2222	14.3889
1961-08-29	24.0556	27.2222	20.6111	18.3333	23.8889	12.7778	NaN	NaN	NaN	NaN	NaN	NaN	16.7778	22.2222	5
1961-08-30	24.4444	26.7222	21.1111	18.7778	22.7778	13.2778	NaN	NaN	NaN	NaN	NaN	NaN	19.5556	23.8889	13.2778
1961-08-31	23.6111	26.7222	20	19.7778	25.6111	11.7222	NaN	NaN	NaN	NaN	NaN	NaN	18.6667	23.2778	12.2222
1961-09-01	23.1667	24.3889	21.1111	17.8889	23.2778	12.7778	NaN	NaN	NaN	NaN	NaN	NaN	17.3333	22.2222	12.2222
1961-09-02	22.3889	25.6111	17.7778	17.5556	22.2222	12.2222	NaN	NaN	NaN	NaN	NaN	NaN	17.5556	20.6111	12.7778
1961-09-03	NaN	NaN	NaN	17.5556	21.7222	12.7778	NaN	NaN	NaN	NaN	NaN	NaN	17.7778	19.3889	14.3889
1961-09-04	NaN	NaN	NaN	17	20.6111	13.8889	NaN	NaN	NaN	NaN	NaN	NaN	14.3333	16.7222	12.7778
1961-09-05	22.5	27.2222	18.2778	17.3333	20.6111	13.2778	NaN	NaN	NaN	NaN	NaN	NaN	17.4444	21.7222	12.7778
1961-09-06	23.0556	25.6111	20	16.9444	20.6111	11.1111	NaN	NaN	NaN	NaN	NaN	NaN	18.5556	22.7778	13.2778
1961-09-07	22.7778	26.1111	17.7778	15.6667	20.6111	7.22222	NaN	NaN	NaN	NaN	NaN	NaN	19	23.2778	11.7222
1961-09-08	23.5	26.7222	18.8889	17.1111	23.2778	6.72222	NaN	NaN	NaN	NaN	NaN	NaN	19	25.6111	8.88889
1961-09-09	24.8889	28.8889	20.6111	17.6667	22.7778	7.22222	NaN	NaN	NaN	NaN	NaN	NaN	20	25	11.7222
1961-09-10	NaN	NaN	NaN	17.9444	20.6111	13.8889	NaN	NaN	NaN	NaN	NaN	NaN	15.6667	18.2778	13.8889
1961-09-11	NaN	NaN	NaN	17.6667	22.7778	7.77778	NaN	NaN	NaN	NaN	NaN	NaN	18.5556	22.7778	10.6111
1961-09-12	23.6111	26.1111	19.3889	18.1111	22.7778	11.1111	NaN	NaN	NaN	NaN	NaN	NaN	19	24.3889	10
1961-09-13	23.2222	26.7222	18.8889	15.5556	22.7778	6.11111	NaN	NaN	NaN	NaN	NaN	NaN	18.4444	24.3889	6.72222
1961-09-14	22.6111	26.1111	18.8889	17.5556	25.6111	5	NaN	NaN	NaN	NaN	NaN	NaN	19.1111	25.6111	6.72222
1961-09-15	23.6111	26.1111	21.1111	16.5556	22.7778	6.72222	NaN	NaN	NaN	NaN	NaN	NaN	19	23.2778	10
1961-09-16	23.3333	26.7222	17.7778	17.5556	23.2778	5.61111	NaN	NaN	NaN	NaN	NaN	NaN	18.1111	23.8889	7.22222
1961-09-17	NaN	NaN	NaN	18.5556	24.3889	6.72222	NaN	NaN	NaN	NaN	NaN	NaN	19.1111	25.6111	7.22222
1961-09-18	NaN	NaN	NaN	18.5556	22.2222	13.8889	NaN	NaN	NaN	NaN	NaN	NaN	18.1111	22.2222	14.3889
1961-09-19	22.5	25.6111	18.2778	17	21.7222	13.2778	NaN	NaN	NaN	NaN	NaN	NaN	18.6667	23.8889	12.7778
1961-09-20	24	27.2222	19.3889	16.2222	22.2222	7.22222	NaN	NaN	NaN	NaN	NaN	NaN	18.4444	24.3889	9.38889
1961-09-21	23.5	26.7222	18.2778	15.8889	21.7222	7.22222	NaN	NaN	NaN	NaN	NaN	NaN	18.3333	24.3889	7.77778
1961-09-22	24.1667	26.1111	21.1111	17.7778	24.3889	8.27778	NaN	NaN	NaN	NaN	NaN	NaN	18.4444	23.8889	10.6111
1961-09-23	24.2222	26.7222	20.6111	18.1111	25.6111	6.72222	NaN	NaN	NaN	NaN	NaN	NaN	17.3333	23.8889	6.72222
1961-09-24	NaN	NaN	NaN	18.3333	22.7778	13.2778	NaN	NaN	NaN	NaN	NaN	NaN	19.2222	24.3889	12.7778
1961-09-25	NaN	NaN	NaN	18.8889	26.1111	6.72222	NaN	NaN	NaN	NaN	NaN	NaN	18.2222	23.2778	8.88889
1961-09-26	23.8889	28.2778	17.2222	16.7778	21.7222	8.27778	NaN	NaN	NaN	NaN	NaN	NaN	15.6667	17.7778	13.8889
1961-09-27	22.3889	26.7222	18.2778	16.7778	20	10.6111	NaN	NaN	NaN	NaN	NaN	NaN	16.1111	20	12.7778
1961-09-28	23.5	27.7778	19.3889	17.6667	21.7222	10.6111	NaN	NaN	NaN	NaN	NaN	NaN	19.4444	23.2778	13.8889
1961-09-29	23.3333	27.7778	17.7778	18.2222	23.8889	10.6111	NaN	NaN	NaN	NaN	NaN	NaN	19.3333	23.8889	12.2222
1961-09-30	24	29.3889	18.2778	16	21.7222	7.22222	NaN	NaN	NaN	NaN	NaN	NaN	20.2222	24.3889	14.3889
1961-10-01	NaN	NaN	NaN	19	23.8889	11.1111	NaN	NaN	NaN	NaN	NaN	NaN	20.1111	24.3889	11.1111
1961-10-02	NaN	NaN	NaN	19.1111	25.6111	6.11111	NaN	NaN	NaN	NaN	NaN	NaN	20.2222	25.6111	9.38889
1961-10-03	22.7778	24.3889	21.1111	17.7778	23.2778	6.72222	NaN	NaN	NaN	NaN	NaN	NaN	20.4444	26.7222	7.22222
1961-10-04	22.8889	26.1111	17.7778	17.8889	25.6111	6.11111	NaN	NaN	NaN	NaN	NaN	NaN	20.3333	27.2222	7.77778
1961-10-05	23.7778	26.7222	20	19.5556	23.2778	12.2222	NaN	NaN	NaN	NaN	NaN	NaN	19.7778	25	11.7222
1961-10-06	21.5556	22.7778	20.6111	17.5556	23.2778	13.8889	NaN	NaN	NaN	NaN	NaN	NaN	19.3333	23.8889	14.3889
1961-10-07	22	25.6111	16.7222	18.7778	26.1111	5	NaN	NaN	NaN	NaN	NaN	NaN	18.8889	24.3889	6.72222
1961-10-08	NaN	NaN	NaN	17.6667	26.1111	3.88889	NaN	NaN	NaN	NaN	NaN	NaN	18	24.3889	4.38889
1961-10-09	NaN	NaN	NaN	18.2222	24.3889	11.7222	NaN	NaN	NaN	NaN	NaN	NaN	19.3333	25.6111	6.72222
1961-10-10	25.5556	28.2778	21.7222	16.5556	24.3889	5.61111	NaN	NaN	NaN	NaN	NaN	NaN	20.5556	27.2222	7.77778
1961-10-11	24.1667	27.2222	18.2778	20.7778	25.6111	13.2778	NaN	NaN	NaN	NaN	NaN	NaN	21.2222	25.6111	15
1961-10-12	24.8889	27.7778	21.7222	17.1111	23.2778	11.7222	NaN	NaN	NaN	NaN	NaN	NaN	20	23.8889	13.8889
1961-10-13	23.5	27.7778	18.8889	15.7778	17.7778	12.2222	NaN	NaN	NaN	NaN	NaN	NaN	20.3333	24.3889	12.7778
1961-10-14	23.6111	26.7222	17.7778	17.7778	22.2222	12.2222	NaN	NaN	NaN	NaN	NaN	NaN	20.6667	24.3889	13.8889
1961-10-15	NaN	NaN	NaN	17.6667	21.1111	13.2778	NaN	NaN	NaN	NaN	NaN	NaN	19.8889	25	10
1961-10-16	NaN	NaN	NaN	17.6667	21.7222	12.2222	NaN	NaN	NaN	NaN	NaN	NaN	20.6667	26.1111	9.38889
1961-10-17	23.3333	27.2222	17.7778	16.4444	20	13.2778	NaN	NaN	NaN	NaN	NaN	NaN	17.8889	23.2778	9.38889
1961-10-18	24.1667	27.7778	20	17	20.6111	13.2778	NaN	NaN	NaN	NaN	NaN	NaN	19.6667	23.8889	14.3889
1961-10-19	24.5556	27.7778	18.8889	17.4444	21.1111	10	NaN	NaN	NaN	NaN	NaN	NaN	20.7778	25	12.7778
1961-10-20	23.7778	26.7222	18.2778	16	18.2778	12.7778	NaN	NaN	NaN	NaN	NaN	NaN	18.8889	23.2778	12.2222
1961-10-21	23.2222	26.1111	18.2778	18	21.7222	12.7778	NaN	NaN	NaN	NaN	NaN	NaN	21.3333	26.7222	13.8889
1961-10-22	NaN	NaN	NaN	16.3333	20	11.7222	NaN	NaN	NaN	NaN	NaN	NaN	18.7778	25	7.77778
1961-10-23	NaN	NaN	NaN	17.2222	21.1111	10.6111	NaN	NaN	NaN	NaN	NaN	NaN	20.4444	26.7222	10.6111
1961-10-24	23.2222	26.7222	17.7778	17.4444	21.1111	13.8889	NaN	NaN	NaN	NaN	NaN	NaN	19.5556	22.7778	15
1961-10-25	22.1111	25.6111	18.8889	16.8889	20.6111	12.7778	NaN	NaN	NaN	NaN	NaN	NaN	19.3333	23.2778	14.3889
1961-10-26	22.5	25.6111	18.8889	17.2222	20	13.8889	NaN	NaN	NaN	NaN	NaN	NaN	20.4444	24.3889	12.2222
1961-10-27	22.8889	26.1111	17.2222	18.5556	21.7222	13.2778	NaN	NaN	NaN	NaN	NaN	NaN	16.5556	20	8.27778
1961-10-28	22.5	23.8889	19.3889	16.6667	19.3889	13.8889	NaN	NaN	NaN	NaN	NaN	NaN	18.5556	22.7778	9.38889
1961-10-29	NaN	NaN	NaN	16.6667	20	13.2778	NaN	NaN	NaN	NaN	NaN	NaN	19.2222	23.8889	11.7222
1961-10-30	NaN	NaN	NaN	17.6667	21.1111	14.3889	NaN	NaN	NaN	NaN	NaN	NaN	20.4444	24.3889	12.7778
1961-10-31	21.3889	25	18.8889	16.8889	20	12.7778	NaN	NaN	NaN	NaN	NaN	NaN	18.4444	21.7222	14.3889
1961-11-01	21.6667	25	19.3889	17.2222	21.7222	15	NaN	NaN	NaN	NaN	NaN	NaN	15.6667	17.2222	13.2778
1961-11-02	22.6111	27.7778	17.2222	17.4444	21.1111	10.6111	NaN	NaN	NaN	NaN	NaN	NaN	18.4444	21.1111	12.7778
1961-11-03	22.7778	25.6111	17.7778	16.7778	21.7222	8.27778	NaN	NaN	NaN	NaN	NaN	NaN	18.7778	24.3889	6.72222
1961-11-04	23.2222	26.7222	19.3889	16.4444	18.2778	12.7778	NaN	NaN	NaN	NaN	NaN	NaN	18.4444	22.7778	9.38889
1961-11-05	NaN	NaN	NaN	17.8889	22.2222	13.8889	NaN	NaN	NaN	NaN	NaN	NaN	20.2222	25	11.7222
1961-11-06	NaN	NaN	NaN	18.8889	22.7778	15	NaN	NaN	NaN	NaN	NaN	NaN	19.5556	24.3889	15
1961-11-07	21.7778	25	19.3889	17.2222	19.3889	15	NaN	NaN	NaN	NaN	NaN	NaN	17.7778	22.2222	14.3889
1961-11-08	20.1667	21.7222	18.8889	16	17.2222	13.8889	NaN	NaN	NaN	NaN	NaN	NaN	16.8889	20	14.3889
1961-11-09	20.4444	22.7778	18.2778	16.2222	20.6111	13.2778	NaN	NaN	NaN	NaN	NaN	NaN	17.6667	21.1111	14.3889
1961-11-10	21.2222	23.2778	18.8889	16.3333	18.8889	14.3889	NaN	NaN	NaN	NaN	NaN	NaN	18	22.2222	14.3889
1961-11-11	18.8889	19.3889	17.7778	17.6667	21.7222	12.7778	NaN	NaN	NaN	NaN	NaN	NaN	16.3333	21.7222	12.7778
1961-11-12	NaN	NaN	NaN	17.9444	21.7222	13.8889	NaN	NaN	NaN	NaN	NaN	NaN	17.8889	21.7222	13.2778
1961-11-13	NaN	NaN	NaN	18.3333	22.2222	13.8889	NaN	NaN	NaN	NaN	NaN	NaN	17.7778	22.2222	13.2778
1961-11-14	22.7778	25.6111	18.8889	18	21.7222	13.8889	NaN	NaN	NaN	NaN	NaN	NaN	18.2222	21.7222	12.7778
1961-11-15	18.8333	19.3889	18.2778	16.5556	19.3889	13.2778	NaN	NaN	NaN	NaN	NaN	NaN	17.4444	20.6111	14.3889
1961-11-16	20	21.7222	17.2222	17.3333	21.1111	15	NaN	NaN	NaN	NaN	NaN	NaN	16.5556	20.6111	14.3889
1961-11-17	20.6667	24.3889	17.7778	17.6667	21.1111	12.2222	NaN	NaN	NaN	NaN	NaN	NaN	17.7778	22.2222	12.7778
1961-11-18	21.5	25	17.2222	16.6667	20.6111	13.2778	NaN	NaN	NaN	NaN	NaN	NaN	19.1111	22.7778	13.8889
1961-11-19	NaN	NaN	NaN	16.4444	18.2778	12.7778	NaN	NaN	NaN	NaN	NaN	NaN	16.7778	18.8889	15
1961-11-20	NaN	NaN	NaN	17.2222	20	13.2778	NaN	NaN	NaN	NaN	NaN	NaN	16.4444	19.3889	13.2778
1961-11-21	22.0556	24.3889	18.2778	17.6667	22.2222	13.2778	NaN	NaN	NaN	NaN	NaN	NaN	18.6667	21.7222	15
1961-11-22	22.1111	25.6111	17.7778	18.1111	21.1111	13.2778	NaN	NaN	NaN	NaN	NaN	NaN	16.6667	21.7222	13.8889
1961-11-23	20.5556	22.7778	17.7778	18.2222	22.2222	14.3889	NaN	NaN	NaN	NaN	NaN	NaN	19.3333	23.2778	12.2222
1961-11-24	20.8333	23.2778	17.7778	16.5556	20.6111	14.3889	NaN	NaN	NaN	NaN	NaN	NaN	16.5556	17.7778	14.3889
1961-11-25	21.2222	23.2778	17.7778	17.0556	20	13.2778	NaN	NaN	NaN	NaN	NaN	NaN	18.2222	21.1111	15
1961-11-26	NaN	NaN	NaN	17.8889	21.1111	14.3889	NaN	NaN	NaN	NaN	NaN	NaN	17.2222	20	14.3889
1961-11-27	NaN	NaN	NaN	16.8889	18.2778	13.8889	NaN	NaN	NaN	NaN	NaN	NaN	17.7778	21.7222	13.2778
1961-11-28	22.5	25.6111	18.2778	17.5556	19.3889	14.3889	NaN	NaN	NaN	NaN	NaN	NaN	17.7778	22.7778	13.2778
1961-11-29	22.9444	25.6111	18.8889	17	19.3889	14.3889	NaN	NaN	NaN	NaN	NaN	NaN	18.5556	21.7222	14.3889
1961-11-30	20.9444	22.7778	19.3889	18.2222	22.2222	12.7778	NaN	NaN	NaN	NaN	NaN	NaN	18.2222	22.2222	15
1961-12-01	23.0556	25	18.8889	17.6667	20	13.2778	NaN	NaN	NaN	NaN	NaN	NaN	17.3333	21.1111	14.3889
1961-12-02	23.8889	26.1111	19.3889	17.5556	23.2778	9.38889	NaN	NaN	NaN	NaN	NaN	NaN	18	21.7222	13.8889
1961-12-03	NaN	NaN	NaN	17.6667	22.7778	6.72222	NaN	NaN	NaN	NaN	NaN	NaN	17.2222	22.7778	10
1961-12-04	NaN	NaN	NaN	17.4444	23.2778	5.61111	NaN	NaN	NaN	NaN	NaN	NaN	18.3333	23.2778	10.6111
1961-12-05	24.2222	26.7222	20.6111	18.7778	22.2222	13.8889	NaN	NaN	NaN	NaN	NaN	NaN	17.4444	23.2778	8.88889
1961-12-06	21.9444	24.3889	19.3889	19.2222	23.8889	11.1111	NaN	NaN	NaN	NaN	NaN	NaN	17.5556	22.7778	11.7222
1961-12-07	20.8333	22.7778	18.8889	18.8889	24.3889	11.1111	NaN	NaN	NaN	NaN	NaN	NaN	18	21.7222	14.3889
1961-12-08	22.7222	25	19.3889	17.3333	21.1111	11.1111	NaN	NaN	NaN	NaN	NaN	NaN	17.5556	22.2222	13.2778
1961-12-09	22.3333	24.3889	19.3889	16.7778	22.7778	8.27778	NaN	NaN	NaN	NaN	NaN	NaN	17.3333	22.7778	11.7222
1961-12-10	NaN	NaN	NaN	19.1111	23.8889	12.2222	NaN	NaN	NaN	NaN	NaN	NaN	18.6667	22.2222	14.3889
1961-12-11	NaN	NaN	NaN	17.6667	22.2222	12.2222	NaN	NaN	NaN	NaN	NaN	NaN	18.3333	21.1111	14.3889
1961-12-12	19.7222	22.2222	17.7778	17	20.6111	13.8889	NaN	NaN	NaN	NaN	NaN	NaN	17.5556	20	14.3889
1961-12-13	20.4444	21.7222	18.2778	16.8889	21.1111	13.2778	NaN	NaN	NaN	NaN	NaN	NaN	17.4444	20.6111	13.2778
1961-12-14	21.2222	24.3889	18.8889	17.5556	21.7222	13.8889	NaN	NaN	NaN	NaN	NaN	NaN	16.4444	19.3889	13.8889
1961-12-15	21.9444	25	16.7222	17.8889	22.2222	10.6111	NaN	NaN	NaN	NaN	NaN	NaN	17.7778	22.2222	11.1111
1961-12-16	20.4444	22.7778	18.8889	17.3333	21.7222	8.88889	NaN	NaN	NaN	NaN	NaN	NaN	16.6667	22.2222	10.6111
1961-12-17	NaN	NaN	NaN	18.2222	23.2778	9.38889	NaN	NaN	NaN	NaN	NaN	NaN	17.4444	21.7222	12.7778
1961-12-18	NaN	NaN	NaN	17.7778	21.7222	10.6111	NaN	NaN	NaN	NaN	NaN	NaN	17.1111	23.2778	10
1961-12-19	21.6667	23.2778	17.7778	18.3333	22.2222	11.1111	NaN	NaN	NaN	NaN	NaN	NaN	17.5556	21.7222	12.2222
1961-12-20	20.4444	23.2778	17.7778	17.5556	22.7778	7.22222	NaN	NaN	NaN	NaN	NaN	NaN	17.1111	22.2222	14.3889
1961-12-21	22.2222	25	17.2222	18.3333	22.7778	10.6111	NaN	NaN	NaN	NaN	NaN	NaN	16.8889	22.7778	13.2778
1961-12-22	22.3333	25	19.3889	18.5556	24.3889	8.88889	NaN	NaN	NaN	NaN	NaN	NaN	18	22.7778	11.7222
1961-12-23	19.5556	21.7222	18.2778	19.1111	23.2778	11.7222	NaN	NaN	NaN	NaN	NaN	NaN	17.5556	22.2222	15
1961-12-24	NaN	NaN	NaN	19.3333	22.7778	11.1111	NaN	NaN	NaN	NaN	NaN	NaN	18.2222	21.1111	12.2222
1961-12-25	NaN	NaN	NaN	18.5556	23.8889	8.88889	NaN	NaN	NaN	NaN	NaN	NaN	17.3333	22.7778	10
1961-12-26	19.4444	21.7222	17.2222	17.7778	22.7778	10.6111	NaN	NaN	NaN	NaN	NaN	NaN	16.4444	21.1111	13.2778
1961-12-27	21.5	23.8889	17.2222	17.5556	21.7222	12.2222	NaN	NaN	NaN	NaN	NaN	NaN	17.8889	23.2778	11.7222
1961-12-28	21.8333	25	18.8889	19	23.2778	12.2222	NaN	NaN	NaN	NaN	NaN	NaN	18	21.7222	13.2778
1961-12-29	21.1111	23.2778	18.2778	17	21.1111	13.8889	NaN	NaN	NaN	NaN	NaN	NaN	16.7778	20.6111	13.8889
1961-12-30	22.6111	25	19.3889	17.6667	21.1111	13.8889	NaN	NaN	NaN	NaN	NaN	NaN	16.5556	20	13.8889
1961-12-31	NaN	NaN	NaN	19.3333	22.7778	14.3889	NaN	NaN	NaN	NaN	NaN	NaN	17	21.1111	13.2778
1962-01-01	NaN	NaN	NaN	NaN	NaN	NaN	NaN	NaN	NaN	NaN	NaN	NaN	NaN	NaN	NaN
1962-01-02	NaN	NaN	NaN	NaN	NaN	NaN	NaN	NaN	NaN	NaN	NaN	NaN	NaN	NaN	NaN
1962-01-03	NaN	NaN	NaN	NaN	NaN	NaN	NaN	NaN	NaN	NaN	NaN	NaN	NaN	NaN	NaN
1962-01-04	NaN	NaN	NaN	NaN	NaN	NaN	NaN	NaN	NaN	NaN	NaN	NaN	NaN	NaN	NaN
1962-01-05	NaN	NaN	NaN	NaN	NaN	NaN	NaN	NaN	NaN	NaN	NaN	NaN	NaN	NaN	NaN
1962-01-06	NaN	NaN	NaN	NaN	NaN	NaN	NaN	NaN	NaN	NaN	NaN	NaN	NaN	NaN	NaN
1962-01-07	NaN	NaN	NaN	NaN	NaN	NaN	NaN	NaN	NaN	NaN	NaN	NaN	NaN	NaN	NaN
1962-01-08	NaN	NaN	NaN	NaN	NaN	NaN	NaN	NaN	NaN	NaN	NaN	NaN	NaN	NaN	NaN
1962-01-09	NaN	NaN	NaN	NaN	NaN	NaN	NaN	NaN	NaN	NaN	NaN	NaN	NaN	NaN	NaN
1962-01-10	NaN	NaN	NaN	NaN	NaN	NaN	NaN	NaN	NaN	NaN	NaN	NaN	NaN	NaN	NaN
1962-01-11	NaN	NaN	NaN	NaN	NaN	NaN	NaN	NaN	NaN	NaN	NaN	NaN	NaN	NaN	NaN
1962-01-12	NaN	NaN	NaN	NaN	NaN	NaN	NaN	NaN	NaN	NaN	NaN	NaN	NaN	NaN	NaN
1962-01-13	NaN	NaN	NaN	NaN	NaN	NaN	NaN	NaN	NaN	NaN	NaN	NaN	NaN	NaN	NaN
1962-01-14	NaN	NaN	NaN	NaN	NaN	NaN	NaN	NaN	NaN	NaN	NaN	NaN	NaN	NaN	NaN
1962-01-15	NaN	NaN	NaN	NaN	NaN	NaN	NaN	NaN	NaN	NaN	NaN	NaN	NaN	NaN	NaN
1962-01-16	NaN	NaN	NaN	NaN	NaN	NaN	NaN	NaN	NaN	NaN	NaN	NaN	NaN	NaN	NaN
1962-01-17	NaN	NaN	NaN	NaN	NaN	NaN	NaN	NaN	NaN	NaN	NaN	NaN	NaN	NaN	NaN
1962-01-18	NaN	NaN	NaN	NaN	NaN	NaN	NaN	NaN	NaN	NaN	NaN	NaN	NaN	NaN	NaN
1962-01-19	NaN	NaN	NaN	NaN	NaN	NaN	NaN	NaN	NaN	NaN	NaN	NaN	NaN	NaN	NaN
1962-01-20	NaN	NaN	NaN	NaN	NaN	NaN	NaN	NaN	NaN	NaN	NaN	NaN	NaN	NaN	NaN
1962-01-21	NaN	NaN	NaN	NaN	NaN	NaN	NaN	NaN	NaN	NaN	NaN	NaN	NaN	NaN	NaN
1962-01-22	NaN	NaN	NaN	NaN	NaN	NaN	NaN	NaN	NaN	NaN	NaN	NaN	NaN	NaN	NaN
1962-01-23	NaN	NaN	NaN	NaN	NaN	NaN	NaN	NaN	NaN	NaN	NaN	NaN	NaN	NaN	NaN
1962-01-24	NaN	NaN	NaN	NaN	NaN	NaN	NaN	NaN	NaN	NaN	NaN	NaN	NaN	NaN	NaN
1962-01-25	NaN	NaN	NaN	NaN	NaN	NaN	NaN	NaN	NaN	NaN	NaN	NaN	NaN	NaN	NaN
1962-01-26	NaN	NaN	NaN	NaN	NaN	NaN	NaN	NaN	NaN	NaN	NaN	NaN	NaN	NaN	NaN
1962-01-27	NaN	NaN	NaN	NaN	NaN	NaN	NaN	NaN	NaN	NaN	NaN	NaN	NaN	NaN	NaN
1962-01-28	NaN	NaN	NaN	NaN	NaN	NaN	NaN	NaN	NaN	NaN	NaN	NaN	NaN	NaN	NaN
1962-01-29	NaN	NaN	NaN	NaN	NaN	NaN	NaN	NaN	NaN	NaN	NaN	NaN	NaN	NaN	NaN
1962-01-30	NaN	NaN	NaN	NaN	NaN	NaN	NaN	NaN	NaN	NaN	NaN	NaN	NaN	NaN	NaN
1962-01-31	NaN	NaN	NaN	NaN	NaN	NaN	NaN	NaN	NaN	NaN	NaN	NaN	NaN	NaN	NaN
1962-02-01	NaN	NaN	NaN	NaN	NaN	NaN	NaN	NaN	NaN	NaN	NaN	NaN	NaN	NaN	NaN
1962-02-02	NaN	NaN	NaN	NaN	NaN	NaN	NaN	NaN	NaN	NaN	NaN	NaN	NaN	NaN	NaN
1962-02-03	NaN	NaN	NaN	NaN	NaN	NaN	NaN	NaN	NaN	NaN	NaN	NaN	NaN	NaN	NaN
1962-02-04	NaN	NaN	NaN	NaN	NaN	NaN	NaN	NaN	NaN	NaN	NaN	NaN	NaN	NaN	NaN
1962-02-05	NaN	NaN	NaN	NaN	NaN	NaN	NaN	NaN	NaN	NaN	NaN	NaN	NaN	NaN	NaN
1962-02-06	NaN	NaN	NaN	NaN	NaN	NaN	NaN	NaN	NaN	NaN	NaN	NaN	NaN	NaN	NaN
1962-02-07	NaN	NaN	NaN	NaN	NaN	NaN	NaN	NaN	NaN	NaN	NaN	NaN	NaN	NaN	NaN
1962-02-08	NaN	NaN	NaN	NaN	NaN	NaN	NaN	NaN	NaN	NaN	NaN	NaN	NaN	NaN	NaN
1962-02-09	NaN	NaN	NaN	NaN	NaN	NaN	NaN	NaN	NaN	NaN	NaN	NaN	NaN	NaN	NaN
1962-02-10	NaN	NaN	NaN	NaN	NaN	NaN	NaN	NaN	NaN	NaN	NaN	NaN	NaN	NaN	NaN
1962-02-11	NaN	NaN	NaN	NaN	NaN	NaN	NaN	NaN	NaN	NaN	NaN	NaN	NaN	NaN	NaN
1962-02-12	NaN	NaN	NaN	NaN	NaN	NaN	NaN	NaN	NaN	NaN	NaN	NaN	NaN	NaN	NaN
1962-02-13	NaN	NaN	NaN	NaN	NaN	NaN	NaN	NaN	NaN	NaN	NaN	NaN	NaN	NaN	NaN
1962-02-14	NaN	NaN	NaN	NaN	NaN	NaN	NaN	NaN	NaN	NaN	NaN	NaN	NaN	NaN	NaN
1962-02-15	NaN	NaN	NaN	NaN	NaN	NaN	NaN	NaN	NaN	NaN	NaN	NaN	NaN	NaN	NaN
1962-02-16	NaN	NaN	NaN	NaN	NaN	NaN	NaN	NaN	NaN	NaN	NaN	NaN	NaN	NaN	NaN
1962-02-17	NaN	NaN	NaN	NaN	NaN	NaN	NaN	NaN	NaN	NaN	NaN	NaN	NaN	NaN	NaN
1962-02-18	NaN	NaN	NaN	NaN	NaN	NaN	NaN	NaN	NaN	NaN	NaN	NaN	NaN	NaN	NaN
1962-02-19	NaN	NaN	NaN	NaN	NaN	NaN	NaN	NaN	NaN	NaN	NaN	NaN	NaN	NaN	NaN
1962-02-20	NaN	NaN	NaN	NaN	NaN	NaN	NaN	NaN	NaN	NaN	NaN	NaN	NaN	NaN	NaN
1962-02-21	NaN	NaN	NaN	NaN	NaN	NaN	NaN	NaN	NaN	NaN	NaN	NaN	NaN	NaN	NaN
1962-02-22	NaN	NaN	NaN	NaN	NaN	NaN	NaN	NaN	NaN	NaN	NaN	NaN	NaN	NaN	NaN
1962-02-23	NaN	NaN	NaN	NaN	NaN	NaN	NaN	NaN	NaN	NaN	NaN	NaN	NaN	NaN	NaN
1962-02-24	NaN	NaN	NaN	NaN	NaN	NaN	NaN	NaN	NaN	NaN	NaN	NaN	NaN	NaN	NaN
1962-02-25	NaN	NaN	NaN	NaN	NaN	NaN	NaN	NaN	NaN	NaN	NaN	NaN	NaN	NaN	NaN
1962-02-26	NaN	NaN	NaN	NaN	NaN	NaN	NaN	NaN	NaN	NaN	NaN	NaN	NaN	NaN	NaN
1962-02-27	NaN	NaN	NaN	NaN	NaN	NaN	NaN	NaN	NaN	NaN	NaN	NaN	NaN	NaN	NaN
1962-02-28	NaN	NaN	NaN	NaN	NaN	NaN	NaN	NaN	NaN	NaN	NaN	NaN	NaN	NaN	NaN
1962-03-01	NaN	NaN	NaN	NaN	NaN	NaN	NaN	NaN	NaN	NaN	NaN	NaN	NaN	NaN	NaN
1962-03-02	NaN	NaN	NaN	NaN	NaN	NaN	NaN	NaN	NaN	NaN	NaN	NaN	NaN	NaN	NaN
1962-03-03	NaN	NaN	NaN	NaN	NaN	NaN	NaN	NaN	NaN	NaN	NaN	NaN	NaN	NaN	NaN
1962-03-04	NaN	NaN	NaN	NaN	NaN	NaN	NaN	NaN	NaN	NaN	NaN	NaN	NaN	NaN	NaN
1962-03-05	NaN	NaN	NaN	NaN	NaN	NaN	NaN	NaN	NaN	NaN	NaN	NaN	NaN	NaN	NaN
1962-03-06	NaN	NaN	NaN	NaN	NaN	NaN	NaN	NaN	NaN	NaN	NaN	NaN	NaN	NaN	NaN
1962-03-07	NaN	NaN	NaN	NaN	NaN	NaN	NaN	NaN	NaN	NaN	NaN	NaN	NaN	NaN	NaN
1962-03-08	NaN	NaN	NaN	NaN	NaN	NaN	NaN	NaN	NaN	NaN	NaN	NaN	NaN	NaN	NaN
1962-03-09	NaN	NaN	NaN	NaN	NaN	NaN	NaN	NaN	NaN	NaN	NaN	NaN	NaN	NaN	NaN
1962-03-10	NaN	NaN	NaN	NaN	NaN	NaN	NaN	NaN	NaN	NaN	NaN	NaN	NaN	NaN	NaN
1962-03-11	NaN	NaN	NaN	NaN	NaN	NaN	NaN	NaN	NaN	NaN	NaN	NaN	NaN	NaN	NaN
1962-03-12	NaN	NaN	NaN	NaN	NaN	NaN	NaN	NaN	NaN	NaN	NaN	NaN	NaN	NaN	NaN
1962-03-13	NaN	NaN	NaN	NaN	NaN	NaN	NaN	NaN	NaN	NaN	NaN	NaN	NaN	NaN	NaN
1962-03-14	NaN	NaN	NaN	NaN	NaN	NaN	NaN	NaN	NaN	NaN	NaN	NaN	NaN	NaN	NaN
1962-03-15	NaN	NaN	NaN	NaN	NaN	NaN	NaN	NaN	NaN	NaN	NaN	NaN	NaN	NaN	NaN
1962-03-16	NaN	NaN	NaN	NaN	NaN	NaN	NaN	NaN	NaN	NaN	NaN	NaN	NaN	NaN	NaN
1962-03-17	NaN	NaN	NaN	NaN	NaN	NaN	NaN	NaN	NaN	NaN	NaN	NaN	NaN	NaN	NaN
1962-03-18	NaN	NaN	NaN	NaN	NaN	NaN	NaN	NaN	NaN	NaN	NaN	NaN	NaN	NaN	NaN
1962-03-19	NaN	NaN	NaN	NaN	NaN	NaN	NaN	NaN	NaN	NaN	NaN	NaN	NaN	NaN	NaN
1962-03-20	NaN	NaN	NaN	NaN	NaN	NaN	NaN	NaN	NaN	NaN	NaN	NaN	NaN	NaN	NaN
1962-03-21	NaN	NaN	NaN	NaN	NaN	NaN	NaN	NaN	NaN	NaN	NaN	NaN	NaN	NaN	NaN
1962-03-22	NaN	NaN	NaN	NaN	NaN	NaN	NaN	NaN	NaN	NaN	NaN	NaN	NaN	NaN	NaN
1962-03-23	NaN	NaN	NaN	NaN	NaN	NaN	NaN	NaN	NaN	NaN	NaN	NaN	NaN	NaN	NaN
1962-03-24	NaN	NaN	NaN	NaN	NaN	NaN	NaN	NaN	NaN	NaN	NaN	NaN	NaN	NaN	NaN
1962-03-25	NaN	NaN	NaN	NaN	NaN	NaN	NaN	NaN	NaN	NaN	NaN	NaN	NaN	NaN	NaN
1962-03-26	NaN	NaN	NaN	NaN	NaN	NaN	NaN	NaN	NaN	NaN	NaN	NaN	NaN	NaN	NaN
1962-03-27	NaN	NaN	NaN	NaN	NaN	NaN	NaN	NaN	NaN	NaN	NaN	NaN	NaN	NaN	NaN
1962-03-28	NaN	NaN	NaN	NaN	NaN	NaN	NaN	NaN	NaN	NaN	NaN	NaN	NaN	NaN	NaN
1962-03-29	NaN	NaN	NaN	NaN	NaN	NaN	NaN	NaN	NaN	NaN	NaN	NaN	NaN	NaN	NaN
1962-03-30	NaN	NaN	NaN	NaN	NaN	NaN	NaN	NaN	NaN	NaN	NaN	NaN	NaN	NaN	NaN
1962-03-31	NaN	NaN	NaN	NaN	NaN	NaN	NaN	NaN	NaN	NaN	NaN	NaN	NaN	NaN	NaN
1962-04-01	NaN	NaN	NaN	NaN	NaN	NaN	NaN	NaN	NaN	NaN	NaN	NaN	NaN	NaN	NaN
1962-04-02	NaN	NaN	NaN	NaN	NaN	NaN	NaN	NaN	NaN	NaN	NaN	NaN	NaN	NaN	NaN
1962-04-03	NaN	NaN	NaN	NaN	NaN	NaN	NaN	NaN	NaN	NaN	NaN	NaN	NaN	NaN	NaN
1962-04-04	NaN	NaN	NaN	NaN	NaN	NaN	NaN	NaN	NaN	NaN	NaN	NaN	NaN	NaN	NaN
1962-04-05	NaN	NaN	NaN	NaN	NaN	NaN	NaN	NaN	NaN	NaN	NaN	NaN	NaN	NaN	NaN
1962-04-06	NaN	NaN	NaN	NaN	NaN	NaN	NaN	NaN	NaN	NaN	NaN	NaN	NaN	NaN	NaN
1962-04-07	NaN	NaN	NaN	NaN	NaN	NaN	NaN	NaN	NaN	NaN	NaN	NaN	NaN	NaN	NaN
1962-04-08	NaN	NaN	NaN	NaN	NaN	NaN	NaN	NaN	NaN	NaN	NaN	NaN	NaN	NaN	NaN
1962-04-09	NaN	NaN	NaN	NaN	NaN	NaN	NaN	NaN	NaN	NaN	NaN	NaN	NaN	NaN	NaN
1962-04-10	NaN	NaN	NaN	NaN	NaN	NaN	NaN	NaN	NaN	NaN	NaN	NaN	NaN	NaN	NaN
1962-04-11	NaN	NaN	NaN	NaN	NaN	NaN	NaN	NaN	NaN	NaN	NaN	NaN	NaN	NaN	NaN
1962-04-12	NaN	NaN	NaN	NaN	NaN	NaN	NaN	NaN	NaN	NaN	NaN	NaN	NaN	NaN	NaN
1962-04-13	NaN	NaN	NaN	NaN	NaN	NaN	NaN	NaN	NaN	NaN	NaN	NaN	NaN	NaN	NaN
1962-04-14	NaN	NaN	NaN	NaN	NaN	NaN	NaN	NaN	NaN	NaN	NaN	NaN	NaN	NaN	NaN
1962-04-15	NaN	NaN	NaN	NaN	NaN	NaN	NaN	NaN	NaN	NaN	NaN	NaN	NaN	NaN	NaN
1962-04-16	NaN	NaN	NaN	NaN	NaN	NaN	NaN	NaN	NaN	NaN	NaN	NaN	NaN	NaN	NaN
1962-04-17	NaN	NaN	NaN	NaN	NaN	NaN	NaN	NaN	NaN	NaN	NaN	NaN	NaN	NaN	NaN
1962-04-18	NaN	NaN	NaN	NaN	NaN	NaN	NaN	NaN	NaN	NaN	NaN	NaN	NaN	NaN	NaN
1962-04-19	NaN	NaN	NaN	NaN	NaN	NaN	NaN	NaN	NaN	NaN	NaN	NaN	NaN	NaN	NaN
1962-04-20	NaN	NaN	NaN	NaN	NaN	NaN	NaN	NaN	NaN	NaN	NaN	NaN	NaN	NaN	NaN
1962-04-21	NaN	NaN	NaN	NaN	NaN	NaN	NaN	NaN	NaN	NaN	NaN	NaN	NaN	NaN	NaN
1962-04-22	NaN	NaN	NaN	NaN	NaN	NaN	NaN	NaN	NaN	NaN	NaN	NaN	NaN	NaN	NaN
1962-04-23	NaN	NaN	NaN	NaN	NaN	NaN	NaN	NaN	NaN	NaN	NaN	NaN	NaN	NaN	NaN
1962-04-24	NaN	NaN	NaN	NaN	NaN	NaN	NaN	NaN	NaN	NaN	NaN	NaN	NaN	NaN	NaN
1962-04-25	NaN	NaN	NaN	NaN	NaN	NaN	NaN	NaN	NaN	NaN	NaN	NaN	NaN	NaN	NaN
1962-04-26	NaN	NaN	NaN	NaN	NaN	NaN	NaN	NaN	NaN	NaN	NaN	NaN	NaN	NaN	NaN
1962-04-27	NaN	NaN	NaN	NaN	NaN	NaN	NaN	NaN	NaN	NaN	NaN	NaN	NaN	NaN	NaN
1962-04-28	NaN	NaN	NaN	NaN	NaN	NaN	NaN	NaN	NaN	NaN	NaN	NaN	NaN	NaN	NaN
1962-04-29	NaN	NaN	NaN	NaN	NaN	NaN	NaN	NaN	NaN	NaN	NaN	NaN	NaN	NaN	NaN
1962-04-30	NaN	NaN	NaN	NaN	NaN	NaN	NaN	NaN	NaN	NaN	NaN	NaN	NaN	NaN	NaN
1962-05-01	NaN	NaN	NaN	NaN	NaN	NaN	NaN	NaN	NaN	NaN	NaN	NaN	NaN	NaN	NaN
1962-05-02	NaN	NaN	NaN	NaN	NaN	NaN	NaN	NaN	NaN	NaN	NaN	NaN	NaN	NaN	NaN
1962-05-03	NaN	NaN	NaN	NaN	NaN	NaN	NaN	NaN	NaN	NaN	NaN	NaN	NaN	NaN	NaN
1962-05-04	NaN	NaN	NaN	NaN	NaN	NaN	NaN	NaN	NaN	NaN	NaN	NaN	NaN	NaN	NaN
1962-05-05	NaN	NaN	NaN	NaN	NaN	NaN	NaN	NaN	NaN	NaN	NaN	NaN	NaN	NaN	NaN
1962-05-06	NaN	NaN	NaN	NaN	NaN	NaN	NaN	NaN	NaN	NaN	NaN	NaN	NaN	NaN	NaN
1962-05-07	NaN	NaN	NaN	NaN	NaN	NaN	NaN	NaN	NaN	NaN	NaN	NaN	NaN	NaN	NaN
1962-05-08	NaN	NaN	NaN	NaN	NaN	NaN	NaN	NaN	NaN	NaN	NaN	NaN	NaN	NaN	NaN
1962-05-09	NaN	NaN	NaN	NaN	NaN	NaN	NaN	NaN	NaN	NaN	NaN	NaN	NaN	NaN	NaN
1962-05-10	NaN	NaN	NaN	NaN	NaN	NaN	NaN	NaN	NaN	NaN	NaN	NaN	NaN	NaN	NaN
1962-05-11	NaN	NaN	NaN	NaN	NaN	NaN	NaN	NaN	NaN	NaN	NaN	NaN	NaN	NaN	NaN
1962-05-12	NaN	NaN	NaN	NaN	NaN	NaN	NaN	NaN	NaN	NaN	NaN	NaN	NaN	NaN	NaN
1962-05-13	NaN	NaN	NaN	NaN	NaN	NaN	NaN	NaN	NaN	NaN	NaN	NaN	NaN	NaN	NaN
1962-05-14	NaN	NaN	NaN	NaN	NaN	NaN	NaN	NaN	NaN	NaN	NaN	NaN	NaN	NaN	NaN
1962-05-15	NaN	NaN	NaN	NaN	NaN	NaN	NaN	NaN	NaN	NaN	NaN	NaN	NaN	NaN	NaN
1962-05-16	NaN	NaN	NaN	NaN	NaN	NaN	NaN	NaN	NaN	NaN	NaN	NaN	NaN	NaN	NaN
1962-05-17	NaN	NaN	NaN	NaN	NaN	NaN	NaN	NaN	NaN	NaN	NaN	NaN	NaN	NaN	NaN
1962-05-18	NaN	NaN	NaN	NaN	NaN	NaN	NaN	NaN	NaN	NaN	NaN	NaN	NaN	NaN	NaN
1962-05-19	NaN	NaN	NaN	NaN	NaN	NaN	NaN	NaN	NaN	NaN	NaN	NaN	NaN	NaN	NaN
1962-05-20	NaN	NaN	NaN	NaN	NaN	NaN	NaN	NaN	NaN	NaN	NaN	NaN	NaN	NaN	NaN
1962-05-21	NaN	NaN	NaN	NaN	NaN	NaN	NaN	NaN	NaN	NaN	NaN	NaN	NaN	NaN	NaN
1962-05-22	NaN	NaN	NaN	NaN	NaN	NaN	NaN	NaN	NaN	NaN	NaN	NaN	NaN	NaN	NaN
1962-05-23	NaN	NaN	NaN	NaN	NaN	NaN	NaN	NaN	NaN	NaN	NaN	NaN	NaN	NaN	NaN
1962-05-24	NaN	NaN	NaN	NaN	NaN	NaN	NaN	NaN	NaN	NaN	NaN	NaN	NaN	NaN	NaN
1962-05-25	NaN	NaN	NaN	NaN	NaN	NaN	NaN	NaN	NaN	NaN	NaN	NaN	NaN	NaN	NaN
1962-05-26	NaN	NaN	NaN	NaN	NaN	NaN	NaN	NaN	NaN	NaN	NaN	NaN	NaN	NaN	NaN
1962-05-27	NaN	NaN	NaN	NaN	NaN	NaN	NaN	NaN	NaN	NaN	NaN	NaN	NaN	NaN	NaN
1962-05-28	NaN	NaN	NaN	NaN	NaN	NaN	NaN	NaN	NaN	NaN	NaN	NaN	NaN	NaN	NaN
1962-05-29	NaN	NaN	NaN	NaN	NaN	NaN	NaN	NaN	NaN	NaN	NaN	NaN	NaN	NaN	NaN
1962-05-30	NaN	NaN	NaN	NaN	NaN	NaN	NaN	NaN	NaN	NaN	NaN	NaN	NaN	NaN	NaN
1962-05-31	NaN	NaN	NaN	NaN	NaN	NaN	NaN	NaN	NaN	NaN	NaN	NaN	NaN	NaN	NaN
1962-06-01	NaN	NaN	NaN	NaN	NaN	NaN	NaN	NaN	NaN	NaN	NaN	NaN	NaN	NaN	NaN
1962-06-02	NaN	NaN	NaN	NaN	NaN	NaN	NaN	NaN	NaN	NaN	NaN	NaN	NaN	NaN	NaN
1962-06-03	NaN	NaN	NaN	NaN	NaN	NaN	NaN	NaN	NaN	NaN	NaN	NaN	NaN	NaN	NaN
1962-06-04	NaN	NaN	NaN	NaN	NaN	NaN	NaN	NaN	NaN	NaN	NaN	NaN	NaN	NaN	NaN
1962-06-05	NaN	NaN	NaN	NaN	NaN	NaN	NaN	NaN	NaN	NaN	NaN	NaN	NaN	NaN	NaN
1962-06-06	NaN	NaN	NaN	NaN	NaN	NaN	NaN	NaN	NaN	NaN	NaN	NaN	NaN	NaN	NaN
1962-06-07	NaN	NaN	NaN	NaN	NaN	NaN	NaN	NaN	NaN	NaN	NaN	NaN	NaN	NaN	NaN
1962-06-08	NaN	NaN	NaN	NaN	NaN	NaN	NaN	NaN	NaN	NaN	NaN	NaN	NaN	NaN	NaN
1962-06-09	NaN	NaN	NaN	NaN	NaN	NaN	NaN	NaN	NaN	NaN	NaN	NaN	NaN	NaN	NaN
1962-06-10	NaN	NaN	NaN	NaN	NaN	NaN	NaN	NaN	NaN	NaN	NaN	NaN	NaN	NaN	NaN
1962-06-11	NaN	NaN	NaN	NaN	NaN	NaN	NaN	NaN	NaN	NaN	NaN	NaN	NaN	NaN	NaN
1962-06-12	NaN	NaN	NaN	NaN	NaN	NaN	NaN	NaN	NaN	NaN	NaN	NaN	NaN	NaN	NaN
1962-06-13	NaN	NaN	NaN	NaN	NaN	NaN	NaN	NaN	NaN	NaN	NaN	NaN	NaN	NaN	NaN
1962-06-14	NaN	NaN	NaN	NaN	NaN	NaN	NaN	NaN	NaN	NaN	NaN	NaN	NaN	NaN	NaN
1962-06-15	NaN	NaN	NaN	NaN	NaN	NaN	NaN	NaN	NaN	NaN	NaN	NaN	NaN	NaN	NaN
1962-06-16	NaN	NaN	NaN	NaN	NaN	NaN	NaN	NaN	NaN	NaN	NaN	NaN	NaN	NaN	NaN
1962-06-17	NaN	NaN	NaN	NaN	NaN	NaN	NaN	NaN	NaN	NaN	NaN	NaN	NaN	NaN	NaN
1962-06-18	NaN	NaN	NaN	NaN	NaN	NaN	NaN	NaN	NaN	NaN	NaN	NaN	NaN	NaN	NaN
1962-06-19	NaN	NaN	NaN	NaN	NaN	NaN	NaN	NaN	NaN	NaN	NaN	NaN	NaN	NaN	NaN
1962-06-20	NaN	NaN	NaN	NaN	NaN	NaN	NaN	NaN	NaN	NaN	NaN	NaN	NaN	NaN	NaN
1962-06-21	NaN	NaN	NaN	NaN	NaN	NaN	NaN	NaN	NaN	NaN	NaN	NaN	NaN	NaN	NaN
[truncated: 18,991 more rows]
