# Supplementary material for: Modelling the Mara River Basin with data uncertainty using water levels for calibration
Source: Copernicus journal article supplement (doi:10.5194/hess-2017-661), 2017-11-23
Supplement: Supplementary file 2 [file hess-2017-661-supplement.zip]

Archive with 3 entries (2 files):
- Supplements/
- Supplements/Supplements.pdf
- Supplements/Supporting data.xlsx
